# Supplementary material for: Synthesis, In Silico and In Vivo Toxicity Assessment of Functionalized Pyridophenanthridinones via Sequential MW-Assisted Intramolecular Friedel-Crafts Alkylation and Direct C–H Arylation
Source: MDPI journal article supplement (doi:10.3390/molecules27238112), 2022-11-22

## Synthesis, *in silico* and *in vivo* toxicity assessment of functionalized pyridophenanthridinones obtained via sequential MW-assisted intramolecular Friedel-Crafts alkylation and direct C–H arylation

Marlyn C. Ortiz Villamizar<sup>1</sup>, Carlos E. Puerto Galvis<sup>1</sup>, Silvia A. Pedraza Rodríguez<sup>1</sup>, Fedor I. Zubkov<sup>2</sup> and Vladimir V. Kouznetsov<sup>1,\*</sup>

<sup>1</sup> *Laboratorio de Química Orgánica y Biomolecular, CMN, Universidad Industrial de Santander. Parque Tecnológico Guatiguará, Km 2 Vía Refugio, Piedecuesta 681011, Colombia.*

<sup>2</sup> *Department of Organic Chemistry, Faculty of Science, RUDN University, 6 Miklukho-Maklaya St., Moscow 117198, Russian Federation*

\* *kouznet@uis.edu.co.*

### SUPPORTING INFORMATION

| List of contents                                                                                                                                                     | Pages |
|----------------------------------------------------------------------------------------------------------------------------------------------------------------------|-------|
| 1. Optimization of reaction conditions for the synthesis of <i>N</i> -arylcinnamamides <b>8a-f</b>                                                                   | SI-2  |
| 2. Characterization data of all synthesized <i>N</i> -arylcinnamamides <b>8a-f</b>                                                                                   | SI-2  |
| 3. Characterization data of all synthesized <i>N</i> -(2-bromobenzyl)- <i>N</i> -phenylcinnamamide <b>7a-f</b>                                                       | SI-5  |
| 4. Optimization of reaction conditions for the synthesis of <i>N</i> -benzyl-4-phenyl-3,4-dihydroquinolin-2(1 <i>H</i> )-ones <b>6a-f</b>                            | SI-8  |
| 5. Characterization data of all synthesized <i>N</i> -benzyl-4-phenyl-3,4-dihydroquinolin-2(1 <i>H</i> )-ones <b>6a-f</b>                                            | SI-9  |
| 6. Characterization data of all synthesized pyrido[3,2,1- <i>de</i> ]phenanthridin-6-ones <b>4a-f</b>                                                                | SI-12 |
| 7. <sup>1</sup> H and <sup>13</sup> C NMR spectra of all synthesized <i>N</i> -arylcinnamamides <b>8a-f</b> (Figures S1-S16)                                         | SI-16 |
| 8. <sup>1</sup> H and <sup>13</sup> C NMR spectra of all synthesized <i>N</i> -(2-bromobenzyl)- <i>N</i> -phenylcinnamamide <b>7a-f</b> (Figures S17-S32)            | SI-24 |
| 9. <sup>1</sup> H and <sup>13</sup> C NMR spectra of all synthesized <i>N</i> -benzyl-4-phenyl-3,4-dihydroquinolin-2(1 <i>H</i> )-ones <b>6a-f</b> (Figures S33-S48) | SI-32 |
| 10. <sup>1</sup> H and <sup>13</sup> C NMR spectra of all synthesized pyrido[3,2,1- <i>de</i> ]phenanthridin-6-ones <b>4a-f</b> (Figures S49-S65)                    | SI-40 |

## 1. Optimization of reaction conditions for the synthesis of *N*-arylcinnamamides **8a-f**

**Table S1.** Optimization of reaction conditions for the synthesis of *N*-arylcinnamamides **8a-f**<sup>a</sup>

Cc1ccc(N)cc1 (**11b**) + OC(=O)/C=C/c1ccccc1 (**10a**)  $\xrightarrow[\text{Temp., Time, Solvent}]{\text{Coupling agent, Base}}$  Cc1ccc(NC(=O)/C=C/c2ccccc2)cc1 (**8b**)

| Entry                 | Solvent (mL)          | Coupling agent (equiv) | Base (equiv)          | Time (h/min) | Temp. (°C) | Yield (%) <sup>b</sup> |
|-----------------------|-----------------------|------------------------|-----------------------|--------------|------------|------------------------|
| <b>1</b> <sup>c</sup> | DMF (15)              | TBTU (1)               | Et <sub>3</sub> N (1) | 48 h         | r.t.       | 36                     |
| <b>2</b> <sup>d</sup> | -                     | SiO <sub>2</sub> (5)   | -                     | 80 min       | 130        | NR <sup>e</sup>        |
| <b>3</b> <sup>d</sup> | -                     | SiO <sub>2</sub> (5)   | -                     | 10 min       | 160        | 28                     |
| <b>4</b> <sup>d</sup> | [Bmim]PF <sub>6</sub> | -                      | -                     | 15 min       | 240        | NR <sup>e</sup>        |
| <b>5</b> <sup>d</sup> | DMF (8)               | DCC (1)                | -                     | 1 min        | 145        | 27                     |
| <b>6</b> <sup>d</sup> | DMF (8)               | DCC (1)                | -                     | 10 min       | 145        | 45                     |
| <b>7</b> <sup>d</sup> | DMF (8)               | TBTU (1)               | Et <sub>3</sub> N (1) | 10 min       | 80         | 77                     |
| <b>8</b> <sup>d</sup> | DMF (8)               | TBTU (1)               | Et <sub>3</sub> N (1) | 10 min       | 100        | 93                     |

<sup>a</sup> Reaction conditions: **11b** (1 equiv), **10** (1 equiv), coupling agent, Base, temperature, time, solvent. <sup>b</sup> Isolated yield after column chromatography over SiO<sub>2</sub>. <sup>c</sup> Reaction performed under conventional conditions. <sup>d</sup> Reaction assisted by microwave irradiation on a Biotage® Initiator+. <sup>e</sup> NR: No Reaction.

## 2. Characterization data of all synthesized *N*-arylcinnamamides **8a-f**

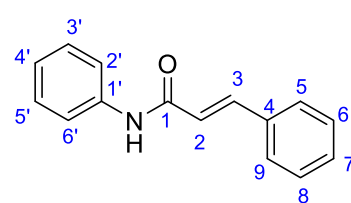

***N*-Phenylcinnamamide (8a)** was prepared according to the general procedure from aniline **11a** (93.13 mg, 1 mmol) and cinnamic acid **10** (148.16 mg, 1 mmol) in DMF. 198.71 mg (0.89 mmol) of a white solid was obtained, with a yield of 89 %.

$R_f = 0.27$  (5: 1 petroleum ether / ethyl acetate); m.p. = 156 °C. **IR** (KBr,  $\nu_{\text{max}}/\text{cm}^{-1}$ ): 3270  $\nu$ (N-H), 3054  $\nu$ (=C-H), 1650  $\nu$ (C=O), 1604  $\nu$ (C=C), 1342  $\nu$ (C-N). **<sup>1</sup>H NMR** (400 MHz, CDCl<sub>3</sub>)  $\delta$  (ppm): 7.90 (s, 1H, NH), 7.75 (d,  $J = 15.5$  Hz, 1H, 3-CH), 7.66 (d,  $J = 7.1$  Hz, 2H, 2'- and 6'-H<sub>Ar</sub>), 7.47 (dd,  $J = 7.2, 2.4$  Hz, 5- and 9-H<sub>Ar</sub>), 7.37–7.28 (m, 5H, 3-, 5-, 6-, 7- and 8-H<sub>Ar</sub>), 7.12 (t,  $J = 7.4$  Hz, 1H, 4'-H<sub>Ar</sub>), 6.62 (d,  $J = 15.5$  Hz, 1H, 2-CH). **<sup>13</sup>C NMR** (101 MHz, CDCl<sub>3</sub>)  $\delta$  (ppm): 164.5 (1-CO), 142.3 (3-CH), 138.2 (1'-C<sub>Ar</sub>), 134.6 (4-C<sub>Ar</sub>), 129.9 (3'- and 5'-C<sub>Ar</sub>), 129.1 (6- and 8-C<sub>Ar</sub>), 128.9 (5- and 9-C<sub>Ar</sub>), 128.0 (7-C<sub>Ar</sub>), 124.5 (4'-C<sub>Ar</sub>), 121.1 (2-CH), 120.3 (2'- and 6'-C<sub>Ar</sub>). **HRMS** (ESI<sup>+</sup>):  $m/z$ : calcd for C<sub>15</sub>H<sub>13</sub>NO ([M+H]<sup>+</sup>) 224.1069, found: 224.1073.

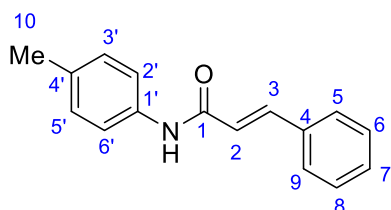

***N*-(*p*-Methylphenyl)cinnamamide (8b)** was prepared according to the general procedure from *p*-toluidine **11b** (107.17 mg, 1 mmol), and cinnamic acid **10** (148.16 mg, 1 mmol) in DMF. 220.69 mg (0.93 mmol) of a white solid was obtained, with a yield of 93%;  $R_f = 0.33$  (5: 1 petroleum ether / ethyl acetate); m.p. = 168–170 °C. **IR**

(KBr,  $\nu_{\max}/\text{cm}^{-1}$ ): 3255  $\nu(\text{N-H})$ , 3054  $\nu(\text{C-H})$ , 1666  $\nu(\text{C=O})$ , 1604  $\nu(\text{C=C})$ , 1342  $\nu(\text{C-N})$ .  **$^1\text{H NMR}$**  (400 MHz,  $\text{CDCl}_3$ )  $\delta(\text{ppm})$ : 7.88 (s, 1H, NH), 7.73 (d,  $J = 15.5$  Hz, 1H, 3-CH), 7.53 (d,  $J = 7.5$  Hz, 2H, 2'- and 6'- $\text{H}_{\text{Ar}}$ ), 7.46 (dd,  $J = 7.1, 2.4$  Hz, 2H, 5- and 9- $\text{H}_{\text{Ar}}$ ), 7.36–7.28 (m, 3H, 6-, 7- and 8- $\text{H}_{\text{Ar}}$ ), 7.12 (d,  $J = 8.2$  Hz, 2H, 3'- and 5'- $\text{H}_{\text{Ar}}$ ), 6.61 (d,  $J = 15.5$  Hz, 1H, 2-CH), 2.31 (s, 3H, 10- $\text{CH}_3$ ).  **$^{13}\text{C NMR}$**  (101 MHz,  $\text{CDCl}_3$ )  $\delta(\text{ppm})$ : 164.2 (1-CO), 142.1 (3-CH), 135.6 (1'- $\text{C}_{\text{Ar}}$ ), 134.8 (4- $\text{C}_{\text{Ar}}$ ), 134.1 (4'- $\text{C}_{\text{Ar}}$ ), 129.9 (3'- and 5'- $\text{C}_{\text{Ar}}$ ), 129.6 (7- $\text{C}_{\text{Ar}}$ ), 128.9 (6- and 8- $\text{C}_{\text{Ar}}$ ), 128.0 (5- and 9- $\text{C}_{\text{Ar}}$ ), 121.2 (2-CH), 120.3 (2'- and 6'- $\text{C}_{\text{Ar}}$ ), 21.0 (10- $\text{CH}_3$ ). **DEPT 135** (101 MHz,  $\text{CDCl}_3$ )  $\delta(\text{ppm})$ : 142.0 (3-CH), 129.8 (3'- and 5'- $\text{C}_{\text{Ar}}$ ), 129.6 (7- $\text{C}_{\text{Ar}}$ ), 128.8 (5- and 9- $\text{C}_{\text{Ar}}$ ), 128.0 (6- and 8- $\text{C}_{\text{Ar}}$ ), 121.2 (2'- and 6'- $\text{C}_{\text{Ar}}$ ), 120.4 (2-CH), 21.0 (10- $\text{CH}_3$ ). Correlation **COSY** [ $\delta\text{H}/\delta\text{H}$ ]: 7.73/6.61 [3-CH/2-CH], 7.53/7.12 [2'- and 6'- $\text{H}_{\text{Ar}}$  / 3'- and 5'- $\text{H}_{\text{Ar}}$ ], 7.46/7.36–7.28 [5- and 9- $\text{H}_{\text{Ar}}$  / 6-, 7- and 8- $\text{H}_{\text{Ar}}$ ]. Correlation **HSQC**, [ $\delta\text{H}/\delta\text{C}$ ]: 7.73/142.1 [3-CH/3-CH], 7.53/ 120.3 [2'- and 6'- $\text{H}_{\text{Ar}}$  / 2'- and 6'- $\text{C}_{\text{Ar}}$ ], 7.46/128.0 [5- and 9- $\text{H}_{\text{Ar}}$  / 5- and 9- $\text{C}_{\text{Ar}}$ ], 7.36–7.28/128.9/129.6 [6, 7 and 8- $\text{H}_{\text{Ar}}$  / 6-, 7- and 8- $\text{C}_{\text{Ar}}$ ], 7.12/129.9 [3'- and 5'- $\text{H}_{\text{Ar}}$  / 3'- and 5'- $\text{C}_{\text{Ar}}$ ], 6.61/121.2 [2-CH/2-CH], 2.31/21.0 [10- $\text{CH}_3$  / 10- $\text{CH}_3$ ]. Correlation **HMBC** [ $\delta\text{H}/\delta\text{C}$ ]: 2.31/129.9/134.1 [10- $\text{CH}_3$  / 3' and 5'- $\text{C}_{\text{Ar}}$  / 4'- $\text{C}_{\text{Ar}}$ ], 6.61/134.8/142.1/164.2 [2-CH/4- $\text{C}_{\text{Ar}}$  / 3-CH / 1-CO], 7.12/21.0/129.9 / 135.6 [3' and 5'- $\text{H}_{\text{Ar}}$  / 10- $\text{CH}_3$  / 3'- and 5'- $\text{C}_{\text{Ar}}$  / 1'- $\text{C}_{\text{Ar}}$ ], 7.36–7.28/128.9/134.8 [6-, 7- and 8- $\text{H}_{\text{Ar}}$  / 5- and 9- $\text{C}_{\text{Ar}}$  / 4- $\text{C}_{\text{Ar}}$ ], 7.46/129.6/142.1 / 128.0 [5 and 9- $\text{H}_{\text{Ar}}$  / 7- $\text{C}_{\text{Ar}}$  / 3-CH / 6- and 8- $\text{C}_{\text{Ar}}$ ], 7.53/134.1 [2'- and 6'- $\text{H}_{\text{Ar}}$  / 4- $\text{C}_{\text{Ar}}$ ], 7.73/121.2/128.9/134.8/164.2 [3-CH/2-CH/5- and 9- $\text{C}_{\text{Ar}}$  / 4- $\text{C}_{\text{Ar}}$  / 1-CO], 7.88/121.2/142.1/164.2 [NH/2-CH/3-CH/1-CO]. **HRMS** (ESI<sup>+</sup>):  $m/z$ : calcd for  $\text{C}_{16}\text{H}_{15}\text{NO}$  ( $[\text{M}+\text{H}]^+$ ) 238.1226, found: 238.1231.

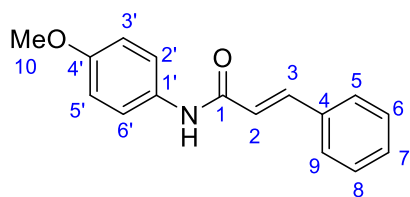

***N*-(4-Methoxyphenyl)cinnamamide (8c)** was prepared according to the general procedure from anisidine **11c** (123.15 mg, 1 mmol) and cinnamic acid **10** (148.16 mg, 1 mmol) in DMF. 222.90 mg (0.88 mmol) of a white solid were obtained, with a yield of 88%;  $R_f = 0.20$  (5:1

petroleum ether/ethyl acetate); m.p. = 155–156 °C. **IR** (KBr,  $\nu_{\max}/\text{cm}^{-1}$ ): 3301  $\nu(\text{N-H})$ , 3054  $\nu(\text{C-H})$ , 1666  $\nu(\text{C=O})$ , 1619  $\nu(\text{C=C})$ , 1342  $\nu(\text{C-N})$ , 1234  $\nu(\text{C-O})$ .  **$^1\text{H NMR}$**  (400 MHz,  $\text{CDCl}_3$ )  $\delta(\text{ppm})$ : 8.16 (s, 1H, NH), 7.71 (d,  $J = 15.6$  Hz, 1H, 3-CH), 7.55 (d,  $J = 8.8$  Hz, 2H, 2'- and 6'- $\text{H}_{\text{Ar}}$ ), 7.45–7.38 (m, 2H, 5- and 9- $\text{H}_{\text{Ar}}$ ), 7.34–7.26 (m, 3H, 6-, 7- and 8- $\text{H}_{\text{Ar}}$ ), 6.83 (d,  $J = 8.9$  Hz, 2H, 3'- and 5'- $\text{H}_{\text{Ar}}$ ), 6.63 (d,  $J = 15.5$  Hz, 1H, 2-CH), 3.74 (s, 3H, 10- $\text{CH}_3$ ).  **$^{13}\text{C NMR}$**  (101 MHz,  $\text{CDCl}_3$ )  $\delta(\text{ppm})$ : 164.2 (1-CO), 156.5 (4'- $\text{C}_{\text{Ar}}$ ), 141.9 (3-CH), 134.8 (4- $\text{C}_{\text{Ar}}$ ), 131.3 (1'- $\text{C}_{\text{Ar}}$ ), 129.9 (7- $\text{C}_{\text{Ar}}$ ), 128.9 (6- and 8- $\text{C}_{\text{Ar}}$ ), 128.0 (5- and 9- $\text{C}_{\text{Ar}}$ ), 122.0 (2'- and 6'- $\text{C}_{\text{Ar}}$ ), 121.1 (2-CH), 114.2 (3'- and 5'- $\text{C}_{\text{Ar}}$ ), 55.5 (10- $\text{CH}_3$ ). **HRMS** (ESI<sup>+</sup>):  $m/z$ : calcd for  $\text{C}_{16}\text{H}_{15}\text{NO}_2$  ( $[\text{M}+\text{H}]^+$ ) 254.1175, found: 254.1180.

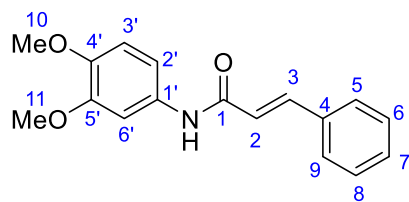

***N*-(3,4-Dimethoxyphenyl)cinnamamide (8d)** was prepared according to the general procedure from 3,4-dimethoxyaniline **1e** (153.18 mg, 1 mmol) and cinnamic acid (148.16 mg, 1 mmol) in DMF. 229.5 mg (0.81 mmol) of a white solid were obtained, with a yield of 81%;  $R_f$  = 0.50 (5:1 petroleum ether/ethyl acetate); m.p. = 147–150 °C. **IR** (KBr,  $\nu_{\max}/\text{cm}^{-1}$ ): 3311  $\nu$ (N-H), 3055  $\nu$ (C-H), 1665  $\nu$ (C=O), 1617  $\nu$ (C=C), 1343  $\nu$ (C-N), 1235  $\nu$ (C-O).  **$^1\text{H}$  NMR** (400 MHz,  $\text{CDCl}_3$ )  $\delta_{\text{(ppm)}}$ : 8.24 (s, 1H, NH), 7.73 (d,  $J$  = 15.6 Hz, 1H, 3-CH), 7.50 (s, 1H, 6'-H<sub>Ar</sub>), 7.44–7.41 (m, 2H, 5- and 9-H<sub>Ar</sub>), 7.32–7.29 (m, 3H, 6-, 7-, and 8-H<sub>Ar</sub>), 7.06 (d,  $J$  = 7.9 Hz, 1H, 3'-H<sub>Ar</sub>), 6.77 (d,  $J$  = 8.7 Hz, 1H, 2'-H<sub>Ar</sub>), 6.64 (d,  $J$  = 15.6 Hz, 1H, 2-CH), 3.82 (s, 6H, 10- and 11-CH<sub>3</sub>).  **$^{13}\text{C}$  NMR** (101 MHz,  $\text{CDCl}_3$ )  $\delta_{\text{(ppm)}}$ : 164.3 (1-CO), 149.1 (4'-C<sub>Ar</sub>), 145.9 (5'-C<sub>Ar</sub>), 142.0 (3-CH), 134.7 (4-C<sub>Ar</sub>), 132.0 (1'-C<sub>Ar</sub>), 129.9 (7-C<sub>Ar</sub>), 128.9 (6- and 8-C<sub>Ar</sub>), 127.9 (5- and 9-C<sub>Ar</sub>), 121.1 (2-CH), 112.2 (6'-C<sub>Ar</sub>), 111.4 (3'-C<sub>Ar</sub>), 105.1 (2'-C<sub>Ar</sub>), 56.1 (11-CH<sub>3</sub>), 55.9 (10-CH<sub>3</sub>). **HRMS** (ESI<sup>+</sup>):  $m/z$ : calcd for  $\text{C}_{17}\text{H}_{17}\text{NO}_3$  ( $[\text{M}+\text{H}]^+$ ) 284.1281, found: 284.1287.

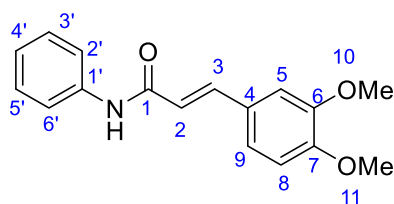

**(*E*)-3-(3,4-Dimethoxyphenyl)-*N*-phenylacrylamide (8e)** was prepared according to the general procedure from aniline **1a** (93.13 mg, 1 mmol) and 3,4-dimethoxybenzoic acid (182.17 mg, 1 mmol) in DMF. 240.85 mg (0.85 mmol) of a white solid were obtained, with a yield of 85%;  $R_f$  = 0.20 (5:1 petroleum ether/ethyl acetate); m.p. = 120–124 °C. **IR** (KBr,  $\nu_{\max}/\text{cm}^{-1}$ ): 3303  $\nu$ (N-H), 3056  $\nu$ (C-H), 1666  $\nu$ (C=O), 1618  $\nu$ (C=C), 1343  $\nu$ (C-N), 1234  $\nu$ (C-O).  **$^1\text{H}$  NMR** (400 MHz,  $\text{CDCl}_3$ )  $\delta_{\text{(ppm)}}$ : 9.09 (s, 1H, NH), 7.73 (d,  $J$  = 8.2 Hz, 2H, 2'- and 6'-H<sub>Ar</sub>), 7.67 (d,  $J$  = 15.5 Hz, 1H, 3-CH), 7.30–7.22 (m, 2H, 3'- and 5'-H<sub>Ar</sub>), 7.08–7.03 (m, 1H, 4'-H<sub>Ar</sub>), 6.92 (dd,  $J$  = 8.4, 2.1 Hz, 1H, 9-H<sub>Ar</sub>), 6.86 (d,  $J$  = 2.0 Hz, 1H, 5-H<sub>Ar</sub>), 7.67 (d,  $J$  = 15.5 Hz, 1H, 2-CH), 6.68 (d,  $J$  = 8.4 Hz, 1H, 8-H<sub>Ar</sub>), 3.80 (s, 3H, 11-CH<sub>3</sub>), 3.65 (s, 3H, 10-CH<sub>3</sub>).  **$^{13}\text{C}$  NMR** (101 MHz,  $\text{CDCl}_3$ )  $\delta_{\text{(ppm)}}$ : 165.1 (1-CO), 150.5 (7-C<sub>Ar</sub>), 148.8 (6-C<sub>Ar</sub>), 141.7 (3-CH), 138.5 (4-C<sub>Ar</sub>), 128.9 (2'- and 6'-C<sub>Ar</sub>), 127.6 (1'-C<sub>Ar</sub>), 124.1 (5-C<sub>Ar</sub>), 121.8 (2-CH), 120.1 (8-C<sub>Ar</sub>), 119.2 (9-C<sub>Ar</sub>), 111.0 (3'- and 5'-C<sub>Ar</sub>), 109.9 (4'-C<sub>Ar</sub>), 55.7 (11-CH<sub>3</sub>), 55.5 (10-CH<sub>3</sub>). **HRMS** (ESI<sup>+</sup>):  $m/z$ : calcd for  $\text{C}_{17}\text{H}_{17}\text{NO}_3$  ( $[\text{M}+\text{H}]^+$ ) 284.1281, found: 284.1290.

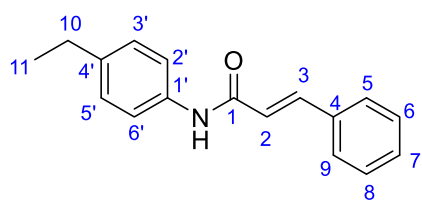

***N*-(4-Ethylphenyl)cinnamamide (8f)** was prepared according to the general procedure from 4-ethylaniline **1d** (121.18 mg, 1 mmol) and cinnamic acid (148.16 mg, 1 mmol) in DMF. 223.68 mg (0.89 mmol) of a white solid were obtained, with a yield of 89%;  $R_f$  = 0.37 (5:1 petroleum ether/ethyl acetate); m.p. = 146–147 °C. **IR** (KBr,  $\nu_{\max}/\text{cm}^{-1}$ ): 3286  $\nu$ (N-H), 3054  $\nu$ (C-H), 2962  $\nu$ (C-C), 1666  $\nu$ (C=O), 1619  $\nu$ (C=C), 1342  $\nu$ (C-N).  **$^1\text{H}$  NMR** (400 MHz,  $\text{CDCl}_3$ )  $\delta_{\text{(ppm)}}$ : 8.07 (s, 1H, NH), 7.73 (d,  $J$  = 15.5 Hz, 1H, 3-CH), 7.57 (d,  $J$  = 7.6 Hz, 2H,

2'- and 6'-H<sub>Ar</sub>), 7.47–7.38 (m, 2H, 5- and 9-H<sub>Ar</sub>), 7.35–7.27 (m, 3H, 6-, 7- and 8-H<sub>Ar</sub>), 7.14 (d,  $J = 8.3$  Hz, 2H, 3- and 5'-H<sub>Ar</sub>), 6.64 (d,  $J = 15.5$  Hz, 1H, 2-CH), 2.60 (q,  $J = 7.6$  Hz, 2H, 10-CH<sub>2</sub>), 1.21 (t,  $J = 7.6$  Hz, 3H, 11-CH<sub>3</sub>). **<sup>13</sup>C NMR** (101 MHz, CDCl<sub>3</sub>)  $\delta_{\text{ppm}}$ : 164.3 (1-CO), 142.1 (3-CH), 140.6 (4'-C<sub>Ar</sub>), 135.8 (1'-C<sub>Ar</sub>), 134.8 (4-C<sub>Ar</sub>), 129.9 (7-C<sub>Ar</sub>), 128.9 (6- and 8-C<sub>Ar</sub>), 128.4 (5- and 9-C<sub>Ar</sub>), 128.0 (3'- and 5'-C<sub>Ar</sub>), 121.2 (2-CH), 120.4 (2'- and 6'-C<sub>Ar</sub>), 28.4 (10-CH<sub>2</sub>), 15.7 (11-CH<sub>3</sub>). **HRMS** (ESI<sup>+</sup>):  $m/z$ : calcd for C<sub>17</sub>H<sub>17</sub>NO ([M+H]<sup>+</sup>) 252.1383, found: 252.1388.

### 3. Characterization data of all synthesized *N*-(2-bromobenzyl)-*N*-phenylcinnamamide 7a-f

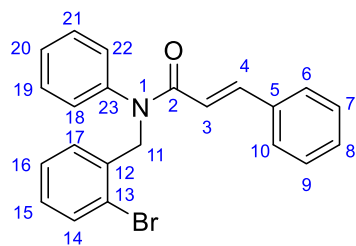

***N*-(2-Bromobenzyl)-*N*-phenylcinnamamide (7a)** was prepared according to the general procedure from *N*-phenylcinnamamide **8a**, (223.27 mg, 1 mmol) and 2-bromobenzyl bromide, **12**, (374.89 mg, 1.5 mmol) in THF. 364.83 mg (0.93 mmol) of a white solid were obtained, with a yield of 93%.  $R_f = 0.47$  (5:1 petroleum ether/ethyl acetate); m.p. = 125 °C. **IR** (KBr,  $\nu_{\text{max}}/\text{cm}^{-1}$ ): 3054  $\nu$ (=C-H), 2915  $\nu$ (C-

C), 1650  $\nu$ (C=O), 1604  $\nu$ (C=C), 1388  $\nu$ (C-N). **<sup>1</sup>H NMR** (400 MHz, CDCl<sub>3</sub>)  $\delta_{\text{ppm}}$ : 7.77 (d,  $J = 15.5$  Hz, 1H, 4-CH), 7.49 (dd,  $J = 8.0, 1.1$  Hz, 1H, 14-H<sub>Ar</sub>), 7.43 (dd,  $J = 7.7, 1.5$  Hz, 1H, 18-H<sub>Ar</sub>), 7.38–7.24 (m, 9H, 6-, 7-, 8-, 9-, 10-, 19-, 20-, 21- and 22-H<sub>Ar</sub>), 7.17–7.14 (m, 2H, 16- and 17-H<sub>Ar</sub>), 7.10 (td,  $J = 7.9, 1.7$  Hz, 1H, 15-H<sub>Ar</sub>), 6.42 (d,  $J = 15.5$  Hz, 1H, 3-CH), 5.19 (s, 2H, 11-CH). **<sup>13</sup>C NMR** (101 MHz, CDCl<sub>3</sub>)  $\delta_{\text{ppm}}$ : 166.3 (2-CO), 142.7 (4-CH), 141.9 (12-C<sub>Ar</sub>), 136.4 (23-C<sub>Ar</sub>), 135.1 (5-C<sub>Ar</sub>), 132.8 (14-C<sub>Ar</sub>), 129.8 (8-C<sub>Ar</sub>), 129.7 (7- and 9-C<sub>Ar</sub>), 129.6 (18- and 22-C<sub>Ar</sub>), 128.8 (16-C<sub>Ar</sub>), 128.8 (6- and 10-C<sub>Ar</sub>), 128.1 (15-C<sub>Ar</sub>), 128.0 (19- and 21-C<sub>Ar</sub>), 128.0 (17-C<sub>Ar</sub>), 127.6 (20-C<sub>Ar</sub>), 123.6 (13-C<sub>Ar</sub>), 118.5 (3-CH), 53.1 (11-CH<sub>2</sub>). **HRMS** (ESI<sup>+</sup>):  $m/z$ : calcd for C<sub>22</sub>H<sub>18</sub>BrNO ([M+H]<sup>+</sup>) 392.0644, found: 392.0652.

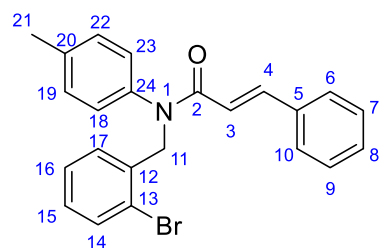

***N*-(2-Bromobenzyl)-*N*-(*p*-tolyl)cinnamamide (7b)** was prepared according to the general procedure from *N*-phenylcinnamamide **8b**, (237.30 mg, 1 mmol) and 2-bromobenzyl bromide, **12**, (374.89 mg, 1.5 mmol) in THF. 337.25 mg (0.83 mmol) of a white solid were obtained, with a yield of 83%.  $R_f = 0.50$  (5:1 petroleum ether/ethyl acetate); m.p. = 153 - 155 °C. **IR** (KBr,  $\nu_{\text{max}}/\text{cm}^{-1}$ ): 3054  $\nu$ (=C-H),

2915  $\nu$ (C-C), 1650  $\nu$ (C=O), 1619  $\nu$ (C=C), 1388  $\nu$ (C-N), 570.84  $\nu$ (C-Br). **<sup>1</sup>H NMR** (400 MHz, CDCl<sub>3</sub>)  $\delta_{\text{ppm}}$ : 7.79 (d,  $J = 15.6$  Hz, 1H, 4-CH), 7.51 (d,  $J = 8.0$  Hz, 1H, 14-H<sub>Ar</sub>), 7.44 (dd,  $J = 7.7, 1.3$  Hz, 1H, 17-H<sub>Ar</sub>), 7.40–7.24 (m, 6H, 6-, 7-, 8-, 9-, 10- and 16-H<sub>Ar</sub>), 7.17 (d,  $J = 8.3$  Hz, 2H, 18- and 23-H<sub>Ar</sub>), 7.12 (td,  $J = 7.8, 1.5$  Hz, 1H, 15-H<sub>Ar</sub>), 7.05 (d,  $J = 8.2$  Hz, 2H, 19- and 22-H<sub>Ar</sub>), 6.47 (d,  $J = 15.6$  Hz, 1H, 3-CH), 5.18 (s, 2H, 11-CH<sub>2</sub>), 2.39 (s, 3H, 21-CH<sub>3</sub>). **<sup>13</sup>C NMR** (101 MHz, CDCl<sub>3</sub>)  $\delta_{\text{ppm}}$ : 166.4 (2-CO), 142.5 (4-CH), 139.3 (12-C<sub>Ar</sub>), 137.8 (20-C<sub>Ar</sub>), 136.5 (24-C<sub>Ar</sub>), 135.2 (5-C<sub>Ar</sub>), 132.8 (14-C<sub>Ar</sub>), 130.2 (17-, 18- and 23-C<sub>Ar</sub>),

129.8 (8-CAr), 129.7 (7- and 9-CAr), 128.8 (6- and 10-CAr), 128.0 (16-CAr), 127.8 (15-CAr), 127.6 (19- and 22-CAr), 123.6 (13-CAr), 118.6 (3-CH), 53.1 (11-CH<sub>2</sub>), 21.2 (21-CH<sub>3</sub>). **DEPT 135** (101 MHz, CDCl<sub>3</sub>)  $\delta_{\text{(ppm)}}$ : 142.5 (4-CH), 132.7 (17-CAr), 130.2 (18- and 23-CAr), 129.7 (8-CAr), 129.7 (7- and 9-CAr), 128.78 (6- and 10-CAr), 128.0 (16-CAr), 127.8 (15-CAr), 127.6 (19- and 22-CAr), 118.6 (3-CH), 53.1 (11-CH<sub>2</sub>), 21.2 (21-CH<sub>3</sub>). Correlation **COSY** [ $\delta\text{H}/\delta\text{H}$ ]: 6.47/7.79 [3-CH/4-CH], 7.05/7.17 [18- and 23-H<sub>Ar</sub>/19- and 22-H<sub>Ar</sub>], 7.12/7.51 [15-H<sub>Ar</sub>/14-H<sub>Ar</sub>], 7.44/7.40–7.24 [17-H<sub>Ar</sub>/16-H<sub>Ar</sub>]. Correlation **HSQC** [ $\delta\text{H}/\delta\text{C}$ ]: 2.39/21.2 [21-CH<sub>3</sub>/21-CH<sub>3</sub>], 5.18/53.1 [11-CH<sub>2</sub>], 6.47/118.6 [3-CH/3-CH], 7.05/127.6 [19 and 22-H<sub>Ar</sub>/19- and 22-CAr], 7.12/127.8 [15-H<sub>Ar</sub>/15-CAr], 7.17/130.2 [18- and 23-H<sub>Ar</sub>/19 and 22-CAr], 7.40 – 7.24/129.7/128.0 [7-, 9- and 16-H<sub>Ar</sub>/7- and 9-CAr/16-CAr], 7.44/130.2 [17-H<sub>Ar</sub>/17-CAr], 7.51/132.8 [14-H<sub>Ar</sub>/14-CAr], 7.79/142.5 [4-CH/4-CH]. Correlation **HMBC** [ $\delta\text{H}/\delta\text{C}$ ]: 2.39/130.21/137.88 [21-CH<sub>3</sub>/18 and 23-CAr/20-CAr], 5.18/123.6/130.2/136.5/139.3/166.4 [11-CH<sub>2</sub>/13-CAr/18 and 23-CAr/24-CAr/12-CAr/2-CO], 6.47/135.2/166.4 [3-CH/5-CAr/2-CO], 7.05/127.6/137.8 [19- and 22-H<sub>Ar</sub>/19- and 22-CAr/20-CAr], 7.12/123.6/130.2 [15-H<sub>Ar</sub>/13-CAr/17-CAr], 7.17/21.2/130.2/137.8 [18- and 23-H<sub>Ar</sub>/21-CH<sub>3</sub>/18- and 23-CAr/20-CAr], 7.40 – 7.24/127.8/132.8/135.2/129.7 [6, 7, 8, 9, 10 and 16-H<sub>Ar</sub>/15-CAr/14-CAr/5-CAr/7- and 9-CAr], 7.44/53.1/123.6/128.0 [17-H<sub>Ar</sub>/11-CH<sub>2</sub>/13-CAr/16-CAr], 7.51/127.8/123.6 [14-H<sub>Ar</sub>/15-CAr/13-CAr], 7.79/118.6/128.8/166.4/135.2 [4-CH/3-CH/6 and 10-CAr/2-CO/5-CAr]. **HRMS** (ESI<sup>+</sup>):  $m/z$ : calcd for C<sub>23</sub>H<sub>20</sub>BrNO ([M+H]<sup>+</sup>) 406.0801, found: 406.0809.

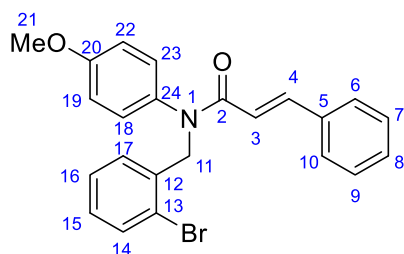

***N*-(2-Bromobenzyl)-*N*-(4-methoxyphenyl)cinnamamide**

(**7c**) was prepared according to the general procedure from *N*-phenylcinnamamide **8c**, (253.30 mg, 1 mmol) and 2-bromobenzyl bromide, **12**, (374.89 mg, 1.5 mmol) in THF. 413.87 mg (0.98 mmol) of a white solid were obtained, with a yield of 98%.  $R_f$  = 0.50 (5:1 petroleum ether/ethyl acetate); m.p. = 101–105 °C. **IR** (KBr,

$\nu_{\text{max}}/\text{cm}^{-1}$ ): 3054  $\nu$ (=C-H), 2962  $\nu$ (C-C), 1650  $\nu$ (C=O), 1619  $\nu$ (C=C), 1388  $\nu$ (C-N). **<sup>1</sup>H NMR** (400 MHz, CDCl<sub>3</sub>)  $\delta_{\text{(ppm)}}$ : 7.75 (d,  $J$  = 15.6 Hz, 1H, 4-CH), 7.48 (dd,  $J$  = 8.0, 0.9 Hz, 1H, 14-H<sub>Ar</sub>), 7.41 (dd,  $J$  = 7.7, 1.5 Hz, 1H, 17-H<sub>Ar</sub>), 7.36–7.23 (m, 6H, 6, 7, 8, 9, 10, 16-H<sub>Ar</sub>), 7.09 (td,  $J$  = 7.8, 1.6 Hz, 1H, 15-H<sub>Ar</sub>), 7.04 (d,  $J$  = 8.9 Hz, 2H, 18- and 23-H<sub>Ar</sub>), 6.85 (d,  $J$  = 8.9 Hz, 2H, 19- and 22-H<sub>Ar</sub>), 6.41 (d,  $J$  = 15.6 Hz, 1H, 3-CH), 5.14 (s, 2H, 11-CH<sub>2</sub>), 3.81 (s, 3H, 21-CH<sub>3</sub>). **<sup>13</sup>C NMR** (101 MHz, CDCl<sub>3</sub>)  $\delta_{\text{(ppm)}}$ : 166.5 (2-CO), 159.0 (20-CAr), 142.5 (4-CH), 136.5 (12-CAr), 135.2 (5-CAr), 134.5 (24-CAr), 132.8 (14-CAr), 130.1 (17-CAr), 129.7 (8-CAr), 129.4 (7- and 9-CAr), 128.8 (16-CAr), 128.8 (6- and 10-CAr), 128.0 (18- and 23-CAr), 127.6 (15-CAr), 123.8 (13-CAr), 118.5 (3-CH), 114.6 (19- and 22-CAr), 55.5 (21-CH<sub>3</sub>), 53.1 (11-CH<sub>2</sub>). **HRMS** (ESI<sup>+</sup>):  $m/z$ : calcd for C<sub>23</sub>H<sub>20</sub>BrNO<sub>2</sub> ([M+H]<sup>+</sup>) 422.0750, found: 422.0758.



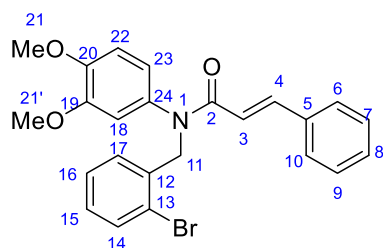***N*-(2-bromobenzyl)-*N*-(3,4-dimethoxyphenyl)**

**cinnamamide (7d)** was prepared according to the general procedure from *N*-(3,4-dimethoxyphenyl)cinnamamide **8d**, (283.33 mg, 1 mmol) and 2-bromobenzyl bromide, **12**, (374.89 mg, 1.5 mmol) in THF. 425.19 mg (0.94 mmol) of a non-color solid were obtained, with a yield of 94%.  $R_f$  = 0.56 (5:1 petroleum ether/ethyl acetate); m.p. = 115–117

°C. **IR** (KBr,  $\nu_{\max}/\text{cm}^{-1}$ ): 3053  $\nu(\text{C-H})$ , 2964  $\nu(\text{C-C})$ , 1655  $\nu(\text{C=O})$ , 1620  $\nu(\text{C=C})$ , 1386  $\nu(\text{C-N})$ .  **$^1\text{H NMR}$**  (400 MHz,  $\text{CDCl}_3$ )  $\delta(\text{ppm})$ : 7.75 (d,  $J$  = 15.6 Hz, 1H, 4-CH), 7.48 (dd,  $J$  = 8.0, 1.4 Hz, 1H, 17- $\text{H}_{\text{Ar}}$ ), 7.42 (dd,  $J$  = 7.7, 1.7 Hz, 1H, 14- $\text{H}_{\text{Ar}}$ ), 7.36–7.27 (m, 5H, 7, 8, 9, 10, and 16- $\text{H}_{\text{Ar}}$ ), 7.25 (dd,  $J$  = 7.6, 1.3 Hz, 1H, 6- $\text{H}_{\text{Ar}}$ ), 7.09 (td,  $J$  = 7.5, 1.7 Hz, 1H, 15- $\text{H}_{\text{Ar}}$ ), 6.79 (d,  $J$  = 8.5 Hz, 1H, 22- $\text{H}_{\text{Ar}}$ ), 6.68 (dd,  $J$  = 8.4, 2.4 Hz, 1H, 23- $\text{H}_{\text{Ar}}$ ), 6.56 (d,  $J$  = 2.4 Hz, 1H, 18- $\text{H}_{\text{Ar}}$ ), 6.42 (d,  $J$  = 15.6 Hz, 1H, 3-CH), 5.16 (s, 2H, 11- $\text{CH}_2$ ), 3.89 (s, 3H, 21'- $\text{CH}_3$ ), 3.73 (s, 3H, 21- $\text{CH}_3$ ).  **$^{13}\text{C NMR}$**  (101 MHz,  $\text{CDCl}_3$ )  $\delta(\text{ppm})$ : 166.4 (2-CO), 149.3 (20- $\text{C}_{\text{Ar}}$ ), 148.7 (19- $\text{C}_{\text{Ar}}$ ), 142.5 (4-CH), 136.7 (12- $\text{C}_{\text{Ar}}$ ), 135.2 (5- $\text{C}_{\text{Ar}}$ ), 134.5 (24- $\text{C}_{\text{Ar}}$ ), 132.7 (14- $\text{C}_{\text{Ar}}$ ), 130.5 (17- $\text{C}_{\text{Ar}}$ ), 129.7 (8- $\text{C}_{\text{Ar}}$ ), 128.9 (16- $\text{C}_{\text{Ar}}$ ), 128.8 (6- and 10- $\text{C}_{\text{Ar}}$ ), 128.0 (7- and 9- $\text{C}_{\text{Ar}}$ ), 127.6 (15- $\text{C}_{\text{Ar}}$ ), 124.0 (13- $\text{C}_{\text{Ar}}$ ), 120.8 (18- $\text{C}_{\text{Ar}}$ ), 118.5 (3-CH), 111.5 (22- $\text{C}_{\text{Ar}}$ ), 111.1 (23- $\text{C}_{\text{Ar}}$ ), 56.0 (21'- and 21- $\text{CH}_3$ ), 52.8 (11- $\text{CH}_2$ ). **HRMS** (ESI<sup>+</sup>):  $m/z$ : calcd for  $\text{C}_{24}\text{H}_{22}\text{BrNO}_3$  ( $[\text{M}+\text{H}]^+$ ) 452.0855, found: 452.0864.

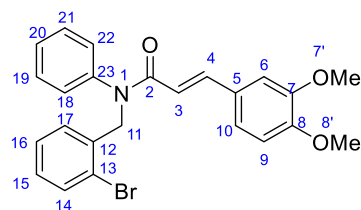***(E)*-*N*-(2-bromobenzyl)-3-(3,4-dimethoxyphenyl)-*N*-phenylacrylamide (7e)**

was prepared according to the general procedure from *(E)*-3-(3,4-dimethoxyphenyl)-*N*-phenylacrylamide **8e**, (253.30 mg, 1 mmol) and 2-bromobenzyl bromide, **12**, (374.89 mg, 1.5 mmol) in THF.

413.87 mg (0.98 mmol) of a yellow liquid were obtained, with a yield of 98%.  $R_f$  = 0.50 (5:1 petroleum ether/ethyl acetate). **IR** (KBr,  $\nu_{\max}/\text{cm}^{-1}$ ): 3056  $\nu(\text{C-H})$ , 2964  $\nu(\text{C-C})$ , 1658  $\nu(\text{C=O})$ , 1621  $\nu(\text{C=C})$ , 1385  $\nu(\text{C-N})$ .  **$^1\text{H NMR}$**  (400 MHz,  $\text{CDCl}_3$ )  $\delta(\text{ppm})$ : 7.69 (d,  $J$  = 15.4 Hz, 1H, 4-CH), 7.48 (dd,  $J$  = 8.0, 1.4 Hz, 1H, 14- $\text{H}_{\text{Ar}}$ ), 7.42 (dd,  $J$  = 7.7, 1.9 Hz, 1H, 17- $\text{H}_{\text{Ar}}$ ), 7.38–7.23 (m, 5H, 10, 16, 19, 20 and 21- $\text{H}_{\text{Ar}}$ ), 7.16 (dd,  $J$  = 8.2, 1.6 Hz, 2H, 18- and 22- $\text{H}_{\text{Ar}}$ ), 7.09 (td,  $J$  = 7.6, 1.8 Hz, 1H, 15- $\text{H}_{\text{Ar}}$ ), 6.95 (dd,  $J$  = 8.6, 2.1 Hz, 1H, 9- $\text{H}_{\text{Ar}}$ ), 6.80 (d,  $J$  = 3.0 Hz, 1H, 6- $\text{H}_{\text{Ar}}$ ), 6.27 (d,  $J$  = 15.4 Hz, 1H, 3-CH), 5.18 (s, 2H, 11- $\text{CH}_2$ ), 3.86 (s, 3H, 24'- $\text{CH}_3$ ), 3.80 (s, 3H, 24- $\text{CH}_3$ ).  **$^{13}\text{C NMR}$**  (101 MHz,  $\text{CDCl}_3$ )  $\delta(\text{ppm})$ : 166.6 (2-CO), 150.7 (8- $\text{C}_{\text{Ar}}$ ), 149.1 (7- $\text{C}_{\text{Ar}}$ ), 142.6 (4-CH), 142.2 (13- $\text{C}_{\text{Ar}}$ ), 136.6 (12- $\text{C}_{\text{Ar}}$ ), 132.8 (14- $\text{C}_{\text{Ar}}$ ), 129.8 (17- $\text{C}_{\text{Ar}}$ ), 129.5 (18- and 22- $\text{C}_{\text{Ar}}$ ), 128.8 (19- and 21- $\text{C}_{\text{Ar}}$ ), 128.2 (23- $\text{C}_{\text{Ar}}$ ), 128.2 (16- $\text{C}_{\text{Ar}}$ ), 127.8 (20- $\text{C}_{\text{Ar}}$ ), 127.6 (15- $\text{C}_{\text{Ar}}$ ), 123.6 (13- $\text{C}_{\text{Ar}}$ ), 121.8 (6- $\text{C}_{\text{Ar}}$ ), 116.6 (3-CH), 111.2 (9- $\text{C}_{\text{Ar}}$ ), 110.5 (10- $\text{C}_{\text{Ar}}$ ), 56.0 (7'- $\text{C}_{\text{Ar}}$ ), 55.9 (8'- $\text{C}_{\text{Ar}}$ ), 53.1 (11- $\text{CH}_2$ ). **HRMS** (ESI<sup>+</sup>):  $m/z$ : calcd for  $\text{C}_{24}\text{H}_{22}\text{BrNO}_3$  ( $[\text{M}+\text{H}]^+$ ) 452.0855, found: 452.0869.

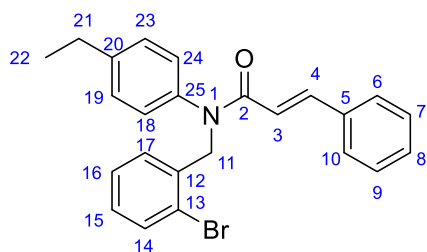

***N*-(2-Bromobenzyl)-*N*-(4-ethylphenyl)cinnamamide (7f)** was prepared according to the general procedure from *N*-(4-Ethylphenyl)cinnamamide **8f**, (251.32 mg, 1 mmol) and 2-bromobenzyl bromide, **12**, (374.89 mg, 1.5 mmol) in THF. 361.50 mg (0.86 mmol) of a white solid were obtained, with a yield of 86%.  $R_f$  = 0.53 (5:1 petroleum ether/ethyl acetate); m.p. = 136–137 °C. **IR**

(KBr,  $\nu_{\max}/\text{cm}^{-1}$ ): 3054  $\nu(\text{C-H})$ , 2962  $\nu(\text{C-C})$ , 1650  $\nu(\text{C=O})$ , 1619  $\nu(\text{C=C})$ , 1388  $\nu(\text{C-N})$ .  **$^1\text{H}$  NMR** (400 MHz,  $\text{CDCl}_3$ )  $\delta_{\text{(ppm)}}$ : 7.77 (d,  $J$  = 15.6 Hz, 1H, 4-CH), 7.49 (dd,  $J$  = 8.0, 1.1 Hz, 1H, 14- $\text{H}_{\text{Ar}}$ ), 7.41 (dd,  $J$  = 7.7, 1.5 Hz, 1H, 17- $\text{H}_{\text{Ar}}$ ), 7.37–7.28 (m, 5H, 6-, 7-, 8-, 9-, 10- $\text{H}_{\text{Ar}}$ ), 7.26 (dd,  $J$  = 7.6, 1.1 Hz, 1H, 16- $\text{H}_{\text{Ar}}$ ), 7.17 (d,  $J$  = 8.5 Hz, 2H, 18- and 24- $\text{H}_{\text{Ar}}$ ), 7.10 (dd,  $J$  = 7.7, 1.5 Hz, 1H, 15- $\text{H}_{\text{Ar}}$ ), 7.06 (d,  $J$  = 8.4 Hz, 2H, 19- and 23- $\text{H}_{\text{Ar}}$ ), 6.46 (d,  $J$  = 15.6 Hz, 1H, 3-CH), 5.16 (s, 2H, 11- $\text{CH}_2$ ), 2.67 (q,  $J$  = 7.6 Hz, 2H, 21- $\text{CH}_2$ ), 1.25 (t,  $J$  = 7.6 Hz, 3H, 22- $\text{CH}_3$ ).  **$^{13}\text{C}$  NMR** (101 MHz,  $\text{CDCl}_3$ )  $\delta_{\text{(ppm)}}$ : 166.4 (2-CO), 144.1 (4-CH), 142.6 (20- $\text{C}_{\text{Ar}}$ ), 139.5 (12- $\text{C}_{\text{Ar}}$ ), 136.5 (25- $\text{C}_{\text{Ar}}$ ), 135.2 (5- $\text{C}_{\text{Ar}}$ ), 132.8 (14- $\text{C}_{\text{Ar}}$ ), 129.7 (7- and 9- $\text{C}_{\text{Ar}}$ ), 129.6 (8- $\text{C}_{\text{Ar}}$ ), 128.9 (19- and 23- $\text{C}_{\text{Ar}}$ ), 128.8 (6- and 10- $\text{C}_{\text{Ar}}$ ), 128.7 (17- $\text{C}_{\text{Ar}}$ ), 128.0 (16- $\text{C}_{\text{Ar}}$ ), 127.8 (15- $\text{C}_{\text{Ar}}$ ), 127.6 (18- and 24- $\text{C}_{\text{Ar}}$ ), 123.5 (13- $\text{C}_{\text{Ar}}$ ), 118.6 (3-CH), 53.3 (11- $\text{CH}_2$ ), 28.5 (21- $\text{CH}_2$ ), 15.4 (22- $\text{CH}_3$ ). **HRMS** (ESI<sup>+</sup>):  $m/z$ : calcd for  $\text{C}_{24}\text{H}_{22}\text{BrNO}$  ( $[\text{M}+\text{H}]^+$ ) 420.0957, found: 420.0965.

#### 4. Optimization of reaction conditions for the synthesis of *N*-benzyl-4-phenyl-3,4-dihydroquinolin-2(1*H*)-ones **6a-f**

**Table S2.** Optimization of reaction conditions for the synthesis of *N*-benzyl-4-phenyl-3,4-dihydroquinolin-2(1*H*)-ones **6a-f**<sup>a</sup>

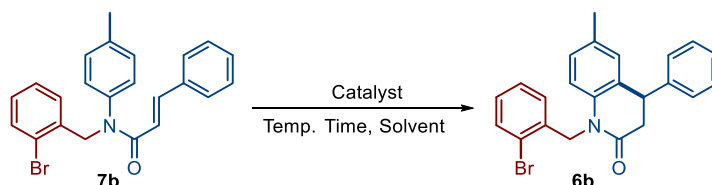

| Entry                 | Catalyst<br>(1 mL/mmol) | Solvent (mL)        | Time (h/min) | Temp. (°C) | Yield (%) <sup>b</sup> |
|-----------------------|-------------------------|---------------------|--------------|------------|------------------------|
| <b>1</b> <sup>c</sup> | TfOH                    | $\text{CHCl}_3$ (5) | 24 h         | 65         | 22                     |
| <b>2</b> <sup>d</sup> | TfOH                    | $\text{CHCl}_3$ (5) | 5 min        | 150        | 18                     |
| <b>3</b> <sup>d</sup> | TFA                     | -                   | 10 min       | 80         | NR <sup>e</sup>        |
| <b>4</b> <sup>d</sup> | TFA                     | -                   | 10 min       | 100        | NR <sup>e</sup>        |
| <b>5</b> <sup>d</sup> | TFA                     | -                   | 60 min       | 100        | Traces                 |
| <b>6</b> <sup>d</sup> | TFA                     | -                   | 30 min       | 120        | 24                     |
| <b>7</b> <sup>d</sup> | TFA                     | -                   | 30 min       | 130        | 38                     |
| <b>8</b> <sup>d</sup> | TFA                     | -                   | 40 min       | 140        | 63                     |

<sup>a</sup> Reaction conditions: **7b** (1 mmol), Catalyst (4 mL/mmol), temperature, time, solvent. <sup>b</sup> Isolated yield after column chromatography over  $\text{SiO}_2$ . <sup>c</sup> Reaction performed under conventional conditions. <sup>d</sup> Reaction assisted by microwave irradiation on a Biotage® Initiator+. <sup>e</sup> NR: No Reaction.



## 5. Characterization data of all synthesized *N*-benzyl-4-phenyl-3,4-dihydroquinolin-2(1*H*)-ones 6a-f

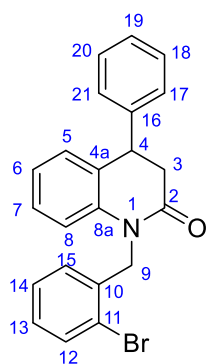

**1-(2-Bromobenzyl)-4-phenyl-3,4-dihydroquinolin-2(1*H*)-one (6a)** was prepared according to the general procedure from *N*-(2-bromobenzyl)-*N*-phenylcinnamamide **7a**, (392.29 mg, 1mmol) and TFA (4 mL). 274.60 mg (0.70 mmol) of a white solid were obtained, with a yield of 70%;  $R_f = 0.37$  (5:1 petroleum ether/ethyl acetate); m.p. = 122–124 °C. **IR** (KBr,  $\nu_{\max}/\text{cm}^{-1}$ ): 3023  $\nu(\text{C-H})$ , 1681  $\nu(\text{C=O})$ , 1373  $\nu(\text{C-N})$ , 694  $\nu(\text{C-Br})$ .  **$^1\text{H}$  NMR** (400 MHz,  $\text{CDCl}_3$ )  $\delta(\text{ppm})$ : 7.59 (dd,  $J = 7.5, 1.6$  Hz, 1H, 12- $\text{H}_{\text{Ar}}$ ), 7.39–7.33 (m, 2H, 21- and 17- $\text{H}_{\text{Ar}}$ ), 7.32–7.27 (m, 1H, 19- $\text{H}_{\text{Ar}}$ ), 7.24–7.19 (m, 2H, 20- and 18- $\text{H}_{\text{Ar}}$ ), 7.19–7.07 (m, 3H, 6-, 7- and 13- $\text{H}_{\text{Ar}}$ ), 7.03–6.96 (m, 2H, 14- and 15- $\text{H}_{\text{Ar}}$ ), 6.85 (dd,  $J = 7.4, 1.9$  Hz, 1H, 5- $\text{H}_{\text{Ar}}$ ), 6.77 (d,  $J = 8.1$  Hz, 1H, 8- $\text{H}_{\text{Ar}}$ ), 5.22 (q,  $J = 17.1$  Hz, 2H, 9- $\text{CH}_2$ ), 4.35 (dd,  $J = 7.6, 6.1$  Hz, 1H, 4-CH), 3.16 (dq,  $J = 15.8, 6.9$  Hz, 2H, 3- $\text{CH}_2$ ).  **$^{13}\text{C}$  NMR** (101 MHz,  $\text{CDCl}_3$ )  $\delta(\text{ppm})$ : 169.5 (2-CO), 140.9 (16- $\text{C}_{\text{Ar}}$ ), 139.3 (8a- $\text{C}_{\text{Ar}}$ ), 135.2 (10- $\text{C}_{\text{Ar}}$ ), 132.9 (12- $\text{C}_{\text{Ar}}$ ), 129.1 (4a- $\text{C}_{\text{Ar}}$ ), 129.0 (18 and 20- $\text{C}_{\text{Ar}}$ ), 128.7 (15- $\text{C}_{\text{Ar}}$ ), 128.5 (13- $\text{C}_{\text{Ar}}$ ), 128.2 (7- $\text{C}_{\text{Ar}}$ ), 127.9 (17- and 21- $\text{C}_{\text{Ar}}$ ), 127.8 (5- $\text{C}_{\text{Ar}}$ ), 127.3 (14- $\text{C}_{\text{Ar}}$ ), 127.2 (19- $\text{C}_{\text{Ar}}$ ), 123.4 (6- $\text{C}_{\text{Ar}}$ ), 122.6 (11- $\text{C}_{\text{Ar}}$ ), 115.7 (8- $\text{C}_{\text{Ar}}$ ), 46.7 (9- $\text{CH}_2$ ), 41.5 (4-CH), 38.8 (3- $\text{CH}_2$ ). **HRMS** (ESI<sup>+</sup>):  $m/z$ : calcd for  $\text{C}_{22}\text{H}_{18}\text{BrNO}$  ( $[\text{M}+\text{H}]^+$ ) 392.0644, found: 392.0652.

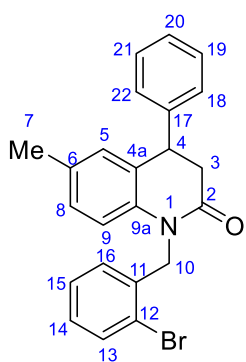

**1-(2-Bromobenzyl)-6-methyl-4-phenyl-3,4-dihydroquinolin-2(1*H*)-one (6b)** was prepared according to the general procedure from *N*-(2-bromobenzyl)-*N*-(*p*-tolyl)cinnamamide (**7b**) (406.32 mg, 1 mmol) and TFA (4 mL). 268.17 mg (0.66 mmol) of a white solid were obtained, with a yield of 66%;  $R_f = 0.38$  (5:1 petroleum ether/ethyl acetate); m.p. = 135 °C. **IR** (KBr,  $\nu_{\max}/\text{cm}^{-1}$ ): 3023  $\nu(\text{C-H})$ , 1681  $\nu(\text{C=O})$ , 1373  $\nu(\text{C-N})$ , 694  $\nu(\text{C-Br})$ .  **$^1\text{H}$  NMR** (400 MHz,  $\text{CDCl}_3$ )  $\delta(\text{ppm})$ : 7.58 (dd,  $J = 7.5, 1.7$  Hz, 1H, 13- $\text{H}_{\text{Ar}}$ ), 7.39–7.33 (m, 2H, 22- and 18- $\text{H}_{\text{Ar}}$ ), 7.32–7.27 (m, 1H, 20- $\text{H}_{\text{Ar}}$ ), 7.23–7.18 (m, 2H, 21 and 19- $\text{H}_{\text{Ar}}$ ), 7.11 (pd,  $J = 7.3, 1.7$  Hz, 2H, 14- and 16- $\text{H}_{\text{Ar}}$ ), 6.96 (dd,  $J = 8.3, 1.9$  Hz, 1H, 8- $\text{H}_{\text{Ar}}$ ), 6.84 (dd,  $J = 6.1, 1.5$  Hz, 2H, 5- and 15- $\text{H}_{\text{Ar}}$ ), 6.67 (d,  $J = 8.3$  Hz, 1H, 9- $\text{H}_{\text{Ar}}$ ), 5.29–5.11 (m, 2H, 10- $\text{CH}_2$ ), 4.30 (t,  $J = 6.7$  Hz, 1H, 4-CH), 3.14 (dq,  $J = 15.8, 6.7$  Hz, 2H, 3- $\text{CH}_2$ ), 2.22 (s, 3H, 7- $\text{CH}_3$ ).  **$^{13}\text{C}$  NMR** (101 MHz,  $\text{CDCl}_3$ )  $\delta(\text{ppm})$ : 169.4 (2-CO), 141.1 (17- $\text{C}_{\text{Ar}}$ ), 136.9 (9a- $\text{C}_{\text{Ar}}$ ), 135.4 (11- $\text{C}_{\text{Ar}}$ ), 133.1 (6- $\text{C}_{\text{Ar}}$ ), 132.9 (13- $\text{C}_{\text{Ar}}$ ), 129.2 (14- $\text{C}_{\text{Ar}}$ ), 129.0 (21- and 19- $\text{C}_{\text{Ar}}$ ), 128.9 (4a- $\text{C}_{\text{Ar}}$ ), 128.7 (16- $\text{C}_{\text{Ar}}$ ), 128.6 (15- $\text{C}_{\text{Ar}}$ ), 127.9 (22 and 18- $\text{C}_{\text{Ar}}$ ), 127.7 (5- $\text{C}_{\text{Ar}}$ ), 127.3 (8- $\text{C}_{\text{Ar}}$ ), 127.2 (20- $\text{C}_{\text{Ar}}$ ), 122.6 (12- $\text{C}_{\text{Ar}}$ ), 115.6 (9- $\text{C}_{\text{Ar}}$ ), 46.7 (10- $\text{CH}_2$ ), 41.5 (4-CH), 39.0 (3- $\text{CH}_2$ ), 20.7 (7- $\text{CH}_3$ ). **HRMS** (ESI<sup>+</sup>):  $m/z$ : calcd for  $\text{C}_{23}\text{H}_{20}\text{BrNO}$  ( $[\text{M}+\text{H}]^+$ ) 406.0801, found: 406.0809.

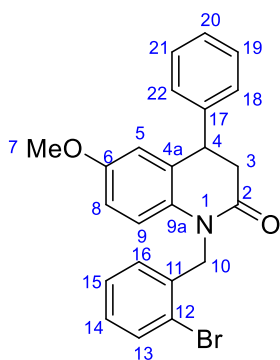

**1-(2-Bromobenzyl)-6-methoxy-4-phenyl-3,4-dihydroquinolin-2(1H)-one. (6c)** was prepared according to the general procedure from *N*-(2-bromobenzyl)-*N*-(4-methoxyphenyl)cinnamamide (**7c**) (422.32 mg, 1 mmol) and TFA (4 mL). 198.49 mg (0.47 mmol) of a white solid was obtained with a yield of 47%;  $R_f$  = 0.27 (5:1 petroleum ether/ethyl acetate); m.p. = 125–127 °C. **IR** (KBr,  $\nu_{\max}/\text{cm}^{-1}$ ): 3023  $\nu(\text{C-H})$ , 2931  $\nu(\text{C-H})$ , 1681  $\nu(\text{C=O})$ , 1296  $\nu(\text{C-N})$ , 740  $\nu(\text{C-Br})$ .  **$^1\text{H NMR}$**  (400 MHz,  $\text{CDCl}_3$ )  $\delta(\text{ppm})$ : 7.58 (dd,  $J$  = 7.6, 1.5 Hz, 1H, 13- $\text{H}_{\text{Ar}}$ ), 7.36 (t,  $J$  = 7.3 Hz, 2H, 22- and 18- $\text{H}_{\text{Ar}}$ ), 7.32–7.27 (m, 1H, 20- $\text{H}_{\text{Ar}}$ ), 7.21 (d,  $J$  = 7.0 Hz, 2H, 21- and 19- $\text{H}_{\text{Ar}}$ ), 7.17–7.07 (m, 2H, 14- and 16- $\text{H}_{\text{Ar}}$ ), 6.85 (dd,  $J$  = 7.5, 1.7 Hz, 1H, 8- $\text{H}_{\text{Ar}}$ ), 6.73–6.65 (m, 2H, 5- and 15- $\text{H}_{\text{Ar}}$ ), 6.56 (d,  $J$  = 2.1 Hz, 1H, 9- $\text{H}_{\text{Ar}}$ ), 5.20 (q,  $J$  = 17.0 Hz, 2H, 10- $\text{CH}_2$ ), 4.30 (dd,  $J$  = 7.4, 6.4 Hz, 1H, 4-CH), 3.68 (s, 3H, 7- $\text{CH}_3$ ), 3.13 (dq,  $J$  = 15.8, 7.0 Hz, 2H, 3- $\text{CH}_2$ ).  **$^{13}\text{C NMR}$**  (101 MHz,  $\text{CDCl}_3$ )  $\delta(\text{ppm})$ : 169.2 (2-CO), 155.7 (6- $\text{C}_{\text{Ar}}$ ), 140.7 (17- $\text{C}_{\text{Ar}}$ ), 135.3 (11- $\text{C}_{\text{Ar}}$ ), 132.9 (13- $\text{C}_{\text{Ar}}$ ), 132.8 (9a- $\text{C}_{\text{Ar}}$ ), 130.7 (16- $\text{C}_{\text{Ar}}$ ), 129.0 (21 and 19- $\text{C}_{\text{Ar}}$ ), 128.7 (14- $\text{C}_{\text{Ar}}$ ), 127.9 (22- and 18- $\text{C}_{\text{Ar}}$ ), 127.8 (20- $\text{C}_{\text{Ar}}$ ), 127.4 (15- $\text{C}_{\text{Ar}}$ ), 127.3 (4a- $\text{C}_{\text{Ar}}$ ), 122.6 (12- $\text{C}_{\text{Ar}}$ ), 116.7 (9- $\text{C}_{\text{Ar}}$ ), 114.8 (8- $\text{C}_{\text{Ar}}$ ), 112.3 (5- $\text{C}_{\text{Ar}}$ ), 55.5 (7- $\text{CH}_3$ ), 46.7 (10- $\text{CH}_2$ ), 41.7 (4-CH), 38.8 (3- $\text{CH}_2$ ). **HRMS** (ESI<sup>+</sup>):  $m/z$ : calcd for  $\text{C}_{23}\text{H}_{20}\text{BrNO}_2$  ( $[\text{M}+\text{H}]^+$ ) 422.0750, found: 422.0758.

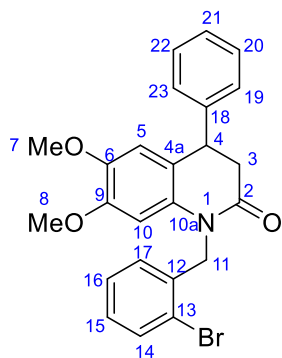

**1-(2-Bromobenzyl)-6,7-dimethoxy-4-phenyl-3,4-dihydroquinolin-2(1H)-one. (6d)** was prepared according to the general procedure from *N*-(2-bromobenzyl)-*N*-(3,4-dimethoxyphenyl)cinnamamide (**7d**) (452.35 mg, 1 mmol) and TFA (4 mL). 226.17 mg (0.50 mmol) of a yellow liquid was obtained with a yield of 50%;  $R_f$  = 0.23 (5:1 petroleum ether/ethyl acetate). **IR** (KBr,  $\nu_{\max}/\text{cm}^{-1}$ ): 3025  $\nu(\text{C-H})$ , 2931  $\nu(\text{C-H})$ , 1683  $\nu(\text{C=O})$ , 1295  $\nu(\text{C-N})$ , 742  $\nu(\text{C-Br})$ .  **$^1\text{H NMR}$**  (400 MHz,  $\text{CDCl}_3$ )  $\delta(\text{ppm})$ : 7.59 (dd,  $J$  = 7.6, 1.5 Hz, 1H, 14- $\text{H}_{\text{Ar}}$ ), 7.39–7.30 (m, 3H, 21, 16 and 15- $\text{H}_{\text{Ar}}$ ), 7.21–7.10 (m, 4H, 23, 22, 20 and 19- $\text{H}_{\text{Ar}}$ ), 6.90 (dd,  $J$  = 7.4, 1.8 Hz, 1H, 17- $\text{H}_{\text{Ar}}$ ), 6.56 (s, 1H, 10- $\text{H}_{\text{Ar}}$ ), 6.42 (s, 1H, 5- $\text{H}_{\text{Ar}}$ ), 5.30 (q,  $J$  = 17.0 Hz, 2H, 11- $\text{CH}_2$ ), 4.28 (t,  $J$  = 6.5 Hz, 1H, 4-CH), 3.74 (s, 3H, 7- $\text{CH}_3$ ), 3.74 (s, 3H, 8- $\text{CH}_3$ ), 3.16 (dd,  $J$  = 6.4, 2.6 Hz, 2H, 3- $\text{CH}_2$ ).  **$^{13}\text{C NMR}$**  (101 MHz,  $\text{CDCl}_3$ )  $\delta(\text{ppm})$ : 169.3 (2-CO), 148.5 (6- $\text{C}_{\text{Ar}}$ ), 144.8 (9- $\text{C}_{\text{Ar}}$ ), 141.3 (18- $\text{C}_{\text{Ar}}$ ), 135.6 (12- $\text{C}_{\text{Ar}}$ ), 132.8 (14- and 17- $\text{C}_{\text{Ar}}$ ), 132.6 (10a- $\text{C}_{\text{Ar}}$ ), 128.9 (22- and 20- $\text{C}_{\text{Ar}}$ ), 128.0 (15- $\text{C}_{\text{Ar}}$ ), 127.9 (21- $\text{C}_{\text{Ar}}$ ), 127.8 (23- and 19- $\text{C}_{\text{Ar}}$ ), 127.3 (16- $\text{C}_{\text{Ar}}$ ), 122.6 (13- $\text{C}_{\text{Ar}}$ ), 120.3 (4a- $\text{C}_{\text{Ar}}$ ), 112.2 (5- $\text{C}_{\text{Ar}}$ ), 101.1 (10- $\text{C}_{\text{Ar}}$ ), 56.2 (7- $\text{CH}_3$ ), 56.2 (8- $\text{CH}_3$ ), 45.8 (11- $\text{CH}_2$ ), 41.1 (4-CH), 39.3 (3- $\text{CH}_2$ ). **HRMS** (ESI<sup>+</sup>):  $m/z$ : calcd for  $\text{C}_{24}\text{H}_{22}\text{BrNO}_3$  ( $[\text{M}+\text{H}]^+$ ) 452.0855, found: 452.0864.

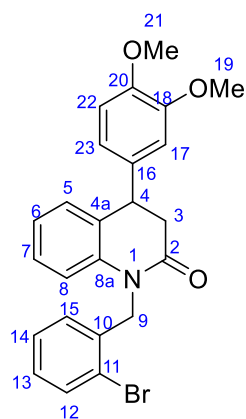

**1-(2-Bromobenzyl)-4-(3,4-dimethoxyphenyl)-3,4-dihydroquinolin-2(1H)-one (6e)** was prepared according to the general procedure from

(*E*)-*N*-(2-bromobenzyl)-3-(3,4-dimethoxyphenyl)-*N*-phenylacrylamide (**7e**) (452.35 mg, 1 mmol) and TFA (4 mL). 248.78 mg (0.55 mmol) of a yellow solid was obtained with a yield of 55%;  $R_f$  = 0.30 (5:1 petroleum ether/ethyl acetate); m.p. = 147–150 °C. **IR** (KBr,  $\nu_{\max}/\text{cm}^{-1}$ ): 3023  $\nu(\text{C-H})$ , 2930  $\nu(\text{C-H})$ , 1684  $\nu(\text{C=O})$ , 1298  $\nu(\text{C-N})$ , 742  $\nu(\text{C-Br})$ .  **$^1\text{H}$  NMR** (400 MHz,  $\text{CDCl}_3$ )  $\delta(\text{ppm})$ : 7.59 (dd,  $J$  = 7.6, 1.7 Hz, 1H, 12- $\text{H}_{\text{Ar}}$ ), 7.18–7.09 (m, 3H, 15-, 14, and 13- $\text{H}_{\text{Ar}}$ ), 7.01–6.99 (m, 2H, 8- and 5- $\text{H}_{\text{Ar}}$ ), 6.86–6.82 (m, 2H, 7- and 6- $\text{H}_{\text{Ar}}$ ), 6.78–6.74 (m, 2H, 22- and 23- $\text{H}_{\text{Ar}}$ ), 6.73 (s, 1H, 17- $\text{H}_{\text{Ar}}$ ), 5.22 (q,  $J$  = 17.0 Hz, 2H, 9- $\text{CH}_2$ ), 4.29 (dd,  $J$  = 8.3, 5.7 Hz, 1H, 4-CH), 3.89 (s, 3H, 21- $\text{CH}_3$ ), 3.82 (s, 3H, 19- $\text{CH}_3$ ), 3.21–3.06 (m, 2H, 3- $\text{CH}_2$ ).  **$^{13}\text{C}$  NMR** (101 MHz,  $\text{CDCl}_3$ )  $\delta(\text{ppm})$ : 169.7 (2-CO), 149.3 (20- $\text{C}_{\text{Ar}}$ ), 148.3 (18- $\text{C}_{\text{Ar}}$ ), 139.3 (8a- $\text{C}_{\text{Ar}}$ ), 135.3 (10- $\text{C}_{\text{Ar}}$ ), 133.3 (16- $\text{C}_{\text{Ar}}$ ), 133.0 (12- $\text{C}_{\text{Ar}}$ ), 129.5 (4a- $\text{C}_{\text{Ar}}$ ), 128.7 (15- $\text{C}_{\text{Ar}}$ ), 128.4 (7- $\text{C}_{\text{Ar}}$ ), 128.1 (13- $\text{C}_{\text{Ar}}$ ), 127.7 (14- $\text{C}_{\text{Ar}}$ ), 127.2 (5- $\text{C}_{\text{Ar}}$ ), 123.4 (6- $\text{C}_{\text{Ar}}$ ), 122.6 (11- $\text{C}_{\text{Ar}}$ ), 120.1 (17- $\text{C}_{\text{Ar}}$ ), 115.7 (8- $\text{C}_{\text{Ar}}$ ), 111.5 (23- $\text{C}_{\text{Ar}}$ ), 111.1 (22- $\text{C}_{\text{Ar}}$ ), 56.0 (21- $\text{CH}_3$ ), 56.0 (19- $\text{CH}_3$ ), 46.7 (9- $\text{CH}_2$ ), 41.1 (4-CH), 39.0 (3- $\text{CH}_2$ ). **HRMS** (ESI+):  $m/z$ : calcd for  $\text{C}_{24}\text{H}_{22}\text{BrNO}_3$  ( $[\text{M}+\text{H}]^+$ ) 452.0855, found: 452.0864.

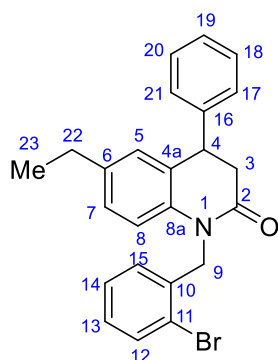

**1-(2-Bromobenzyl)-6-ethyl-4-phenyl-3,4-dihydroquinolin-2(1H)-one (6f)** was prepared according to the general procedure from *N*-(2-bromobenzyl)-*N*-(4-ethylphenyl)cinnamamide (**7f**) (420.35 mg,

1 mmol) and TFA (4 mL). 180.75 mg (0.68 mmol) of a white solid was obtained with a yield of 68%;  $R_f$  = 0.43 (5:1 petroleum ether/ethyl acetate); m.p. = 111–113 °C. **IR** (KBr,  $\nu_{\max}/\text{cm}^{-1}$ ): 3023  $\nu(\text{C-H})$ , 2962  $\nu(\text{C-H})$ , 1666  $\nu(\text{C=O})$ , 1373  $\nu(\text{C-N})$ , 740  $\nu(\text{C-Br})$ .  **$^1\text{H}$  NMR** (400 MHz,  $\text{CDCl}_3$ )  $\delta(\text{ppm})$ : 7.59 (dd,  $J$  = 7.6, 1.6 Hz, 1H, 12- $\text{H}_{\text{Ar}}$ ), 7.39–7.33 (m, 2H, 21- and 17- $\text{H}_{\text{Ar}}$ ), 7.32–7.27 (m, 1H, 19- $\text{H}_{\text{Ar}}$ ), 7.23–7.18 (m, 2H, 20- and 18- $\text{H}_{\text{Ar}}$ ), 7.12 (pd,  $J$  = 7.3, 1.7 Hz, 2H, 13- and 15- $\text{H}_{\text{Ar}}$ ), 7.00 (dd,  $J$  = 8.3, 1.9 Hz, 1H, 7- $\text{H}_{\text{Ar}}$ ), 6.85 (dd,  $J$  = 7.1, 1.6 Hz, 2H, 5- and 14- $\text{H}_{\text{Ar}}$ ), 6.70 (d,  $J$  = 8.3 Hz, 1H, 8- $\text{H}_{\text{Ar}}$ ), 5.27–5.13 (m, 2H, 9- $\text{CH}_2$ ), 4.32 (t,  $J$  = 6.6 Hz, 1H, 4-CH), 3.22–3.06 (m, 2H, 3- $\text{CH}_2$ ), 2.53 (q,  $J$  = 7.6 Hz, 2H, 22- $\text{CH}_2$ ), 1.15 (t,  $J$  = 7.6 Hz, 3H, 23- $\text{CH}_3$ ).  **$^{13}\text{C}$  NMR** (101 MHz,  $\text{CDCl}_3$ )  $\delta(\text{ppm})$ : 169.4 (2-CO), 141.1 (16- $\text{C}_{\text{Ar}}$ ), 139.5 (6- $\text{C}_{\text{Ar}}$ ), 137.1 (8a- $\text{C}_{\text{Ar}}$ ), 135.4 (10- $\text{C}_{\text{Ar}}$ ), 132.9 (12- $\text{C}_{\text{Ar}}$ ), 128.9 (20- and 18- $\text{C}_{\text{Ar}}$ ), 128.8 (4a- $\text{C}_{\text{Ar}}$ ), 128.6 (15- $\text{C}_{\text{Ar}}$ ), 128.1 (13- $\text{C}_{\text{Ar}}$ ), 127.9 (21- and 17- $\text{C}_{\text{Ar}}$ ), 127.7 (5- $\text{C}_{\text{Ar}}$ ), 127.4 (14- $\text{C}_{\text{Ar}}$ ), 127.3 (7- $\text{C}_{\text{Ar}}$ ), 127.2 (19- $\text{C}_{\text{Ar}}$ ), 122.6 (11- $\text{C}_{\text{Ar}}$ ), 115.7 (8- $\text{C}_{\text{Ar}}$ ), 46.7 (9- $\text{CH}_2$ ), 41.6 (4-CH), 39.0 (3- $\text{CH}_2$ ), 28.1 (22- $\text{CH}_2$ ), 15.6 (23- $\text{CH}_3$ ). **DEPT 135** (101 MHz,  $\text{CDCl}_3$ )  $\delta(\text{ppm})$ : 132.9 (12- $\text{C}_{\text{Ar}}$ ), 128.9 (20- and 18- $\text{C}_{\text{Ar}}$ ), 128.6 (15- $\text{C}_{\text{Ar}}$ ), 128.1 (13- $\text{C}_{\text{Ar}}$ ), 127.8 (21- and 17- $\text{C}_{\text{Ar}}$ ), 127.7 (5- $\text{C}_{\text{Ar}}$ ), 127.3 (14- $\text{C}_{\text{Ar}}$ ), 127.3 (7- $\text{C}_{\text{Ar}}$ ), 127.2 (19- $\text{C}_{\text{Ar}}$ ), 115.7 (8- $\text{C}_{\text{Ar}}$ ), 46.7 (9- $\text{CH}_2$ ), 41.5 (4-CH), 39.0 (3- $\text{CH}_2$ ), 28.1 (22- $\text{CH}_2$ ), 15.6 (23- $\text{CH}_3$ ). **COSY** Correlation [ $\delta\text{H}/\delta\text{H}$ ]: 1.15/2.53 [23- $\text{CH}_3$ /22- $\text{CH}_2$ ], 3.22–3.06/4.32 [3- $\text{CH}_2$ /4-CH], 6.70/7.00 [8- $\text{H}_{\text{Ar}}$ /15-

H<sub>Ar</sub>], 6.85/7.12 [14-H<sub>Ar</sub>/13- and 15-H<sub>Ar</sub>], 7.12/7.59 [13- and 15-H<sub>Ar</sub>/12-H<sub>Ar</sub>], 7.21/7.36 [20- and 18-H<sub>Ar</sub>/21 and 17-H<sub>Ar</sub>]. **HSQC** Correlation [ $\delta\text{H}/\delta\text{C}$ ]: 1.15/15.6 [23-CH<sub>3</sub>/23-CH<sub>3</sub>], 2.53/28.1 [22-CH<sub>2</sub>/22-CH<sub>2</sub>], 3.22–3.06/39.0 [3-CH<sub>2</sub>/3-CH<sub>2</sub>], 4.32/41.6 [4-CH/4-CH], 5.27 – 5.13/46.7 [9-CH<sub>2</sub>/9-CH<sub>2</sub>], 6.70/115.7 [8-H<sub>Ar</sub>/8-C<sub>Ar</sub>], 6.85/127.4 [5- and 14-H<sub>Ar</sub>/5- and/or 14-C<sub>Ar</sub>], 7.00/127.3 [7-H<sub>Ar</sub>/7-C<sub>Ar</sub>], 7.12/128.6 [15-H<sub>Ar</sub>/15-C<sub>Ar</sub>], 7.23–7.18/128.9 [20- and 18-H<sub>Ar</sub>/20 and 18-C<sub>Ar</sub>], 7.32–7.27/127.2 [19-H<sub>Ar</sub>/19-C<sub>Ar</sub>], 7.39–7.33/127.9 [21- and 17-H<sub>Ar</sub>/21 and 17-C<sub>Ar</sub>], 7.59/132.9 [12-H<sub>Ar</sub>/12-C<sub>Ar</sub>]. **HMBC** Correlation [ $\delta\text{H}/\delta\text{C}$ ]: 1.15/28.1/139.5 [23-CH<sub>3</sub>/22-CH<sub>2</sub>/6-C<sub>Ar</sub>], 2.53/15.6/127.7/139.5 [22-CH<sub>2</sub>/23-CH<sub>3</sub>/5-C<sub>Ar</sub>/6-C<sub>Ar</sub>], 3.22–3.06/41.6/ 128.8/141.1/169.4 [3-CH<sub>2</sub>/4-CH/4a-C<sub>Ar</sub>/16-C<sub>Ar</sub>/2-CO], 4.32/39.0/128.8/ 137.1/141.1/169.4 [4-CH/3-CH<sub>2</sub>/4a-C<sub>Ar</sub>/8a-C<sub>Ar</sub>/16-C<sub>Ar</sub>/2-CO], 5.27 – 5.13/122.6/135.4/169.4 [9-CH<sub>2</sub>/11-C<sub>Ar</sub>/10-C<sub>Ar</sub>/2-CO], 6.7/128.8/139.5 [8-H<sub>Ar</sub>/4a-C<sub>Ar</sub>/6-C<sub>Ar</sub>], 6.8/28.1/41.6/128.1/135.4 [5- and 14-H<sub>Ar</sub>/22-CH<sub>2</sub>/4-CH/13-C<sub>Ar</sub>/10-C<sub>Ar</sub>], 7.00/28.1/115.7/127.7/137.1 [7-H<sub>Ar</sub>/22-CH<sub>2</sub>/8-C<sub>Ar</sub>/5-C<sub>Ar</sub>/8a-C<sub>Ar</sub>], 7.12/122.6/ 127.4/132.9/135.4 [13 and 15-H<sub>Ar</sub>/11-C<sub>Ar</sub>/14-C<sub>Ar</sub>/12-C<sub>Ar</sub>/10-C<sub>Ar</sub>], 7.23–7.18/41.6/127.2 [20- and 18-H<sub>Ar</sub>/4-CH/19-C<sub>Ar</sub>], 7.32–7.27/127.9 [19-H<sub>Ar</sub>/21 and 17-C<sub>Ar</sub>], 7.39–7.33/128.9/141.1 [21- and 17-H<sub>Ar</sub>/20- and 18-C<sub>Ar</sub>/16-C<sub>Ar</sub>], 7.59/127.4/135.4/122.6 [12-H<sub>Ar</sub>/14-C<sub>Ar</sub>/10-C<sub>Ar</sub>/11-C<sub>Ar</sub>]. **HRMS** (ESI<sup>+</sup>):  $m/z$ : calcd for C<sub>24</sub>H<sub>22</sub>BrNO ([M+H]<sup>+</sup>) 420.0957, found: 420.965.

## 6. Characterization data of all synthesized pyrido[3,2,1-*de*]phenanthridin-6-ones 4a-f

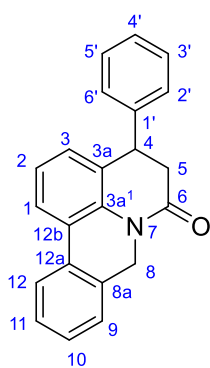

### 4-Phenyl-4,5-dihydro-6H,8H-pyrido[3,2,1-*de*]phenanthridin-6-one

(**4a**) was prepared according to the general procedure from 1-(2-bromobenzyl)-4-phenyl-3,4-dihydroquinolin-2(1*H*)-one **6a** (392.29 mg, 1 mmol). 289.58 mg (0.93 mmol) of a yellow solid was obtained with a yield 93%;  $R_f$  = 0.50 (4:1 petroleum ether/ethyl acetate); m.p. = 159–160 °C. **IR** (KBr,  $\nu_{\text{max}}/\text{cm}^{-1}$ ): 3023  $\nu$ (=C-H), 2854  $\nu$ (C-H), 1681  $\nu$ (C=O), 1388  $\nu$ (C-N). **<sup>1</sup>H NMR** (400 MHz, CDCl<sub>3</sub>)  $\delta$ (ppm): 7.76 (t,  $J$  = 7.0 Hz, 2H, 1- and 12-H<sub>Ar</sub>), 7.38–7.36 (m, 2H, 2'- and 6'-H<sub>Ar</sub>), 7.34 (s, 1H, 11-H<sub>Ar</sub>), 7.31–7.29 (m, 3H, 4'-, 9- and 10-H<sub>Ar</sub>), 7.23–7.17 (m, 2H, 3'- and 5'-H<sub>Ar</sub>), 7.09 (t,  $J$  = 7.7 Hz, 1H, 2-H<sub>Ar</sub>), 6.89 (d,  $J$  = 7.5 Hz, 1H, 3-H<sub>Ar</sub>), 5.11 (d,  $J$  = 15.6 Hz, 1H, 8-CH<sub>2</sub>), 5.00 (d,  $J$  = 15.6 Hz, 1H, 8-CH<sub>2</sub>), 4.28 (t,  $J$  = 7.3 Hz, 1H, 4-CH), 3.03–2.91 (m, 2H, 5-CH<sub>2</sub>). **<sup>13</sup>C NMR** (101 MHz, CDCl<sub>3</sub>)  $\delta$ (ppm): 168.3 (6-CO), 141.0 (1'-C<sub>Ar</sub>), 135.4 (3a<sup>1</sup>-C<sub>Ar</sub>), 131.5 (12a-C<sub>Ar</sub>), 130.6 (8a-C<sub>Ar</sub>), 129.8 (3a-C<sub>Ar</sub>), 129.0 (3'- and 5'-C<sub>Ar</sub>), 128.3 (10-C<sub>Ar</sub>), 128.2 (11-C<sub>Ar</sub>), 127.9 (3-C<sub>Ar</sub>), 127.8 (2'- and 6'-C<sub>Ar</sub>), 127.4 (9-C<sub>Ar</sub>), 126.7 (4'-C<sub>Ar</sub>), 124.1 (12b-C<sub>Ar</sub>), 124.0 (2-C<sub>Ar</sub>), 123.2 (1-C<sub>Ar</sub>), 122.6 (12-C<sub>Ar</sub>), 42.6 (8-CH<sub>2</sub>), 41.6 (4-CH), 38.7 (5-CH<sub>2</sub>). **HRMS** (ESI<sup>+</sup>):  $m/z$ : calcd for C<sub>22</sub>H<sub>17</sub>NO ([M+H]<sup>+</sup>) 312.1383, found: 312.1389.

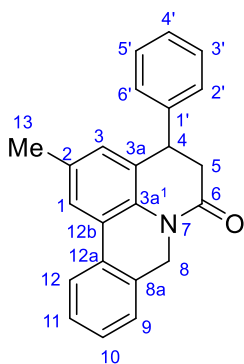

**2-Methyl-4-phenyl-4,5-dihydro-6H,8H-pyrido[3,2,1-de]phenanthridin-6-one (4b)** was prepared according to the general procedure from 1-(2-bromobenzyl)-6-methyl-4-phenyl-3,4-dihydroquinolin-2(1*H*)-one (**6b**) (406.32 mg, 1 mmol). 302.63 mg (0.93 mmol) of a yellow solid was obtained with a yield of 93%;  $R_f$  = 0.50 (4:1 petroleum ether/ethyl acetate); m.p. = 178–181 °C. **IR** (KBr,  $\nu_{\text{max}}/\text{cm}^{-1}$ ): 3023  $\nu(\text{C-H})$ , 2854  $\nu(\text{C-H})$ , 1666  $\nu(\text{C=O})$ , 1373  $\nu(\text{C-N})$ .  **$^1\text{H NMR}$**  (400 MHz,  $\text{CDCl}_3$ )  $\delta_{\text{(ppm)}}$ : 7.77 (d,  $J$  = 7.6 Hz, 1H, 12- $\text{H}_{\text{Ar}}$ ), 7.56 (s, 1H, 1- $\text{H}_{\text{Ar}}$ ), 7.40–7.32 (m, 3H, 2'-, 6'- and 11- $\text{H}_{\text{Ar}}$ ), 7.30–7.28 (m, 3H, 4'-, 9- and 10- $\text{H}_{\text{Ar}}$ ), 7.23–7.17 (m, 2H, 3'- and 5'- $\text{H}_{\text{Ar}}$ ), 6.72 (d,  $J$  = 0.8 Hz, 1H, 3- $\text{H}_{\text{Ar}}$ ), 5.04 (s, 2H, 8- $\text{CH}_2$ ), 4.24 (t,  $J$  = 7.0 Hz, 1H, 4-CH), 2.94 (d,  $J$  = 7.1 Hz, 2H, 5- $\text{CH}_2$ ), 2.32 (s, 3H, 13- $\text{CH}_3$ ).  **$^{13}\text{C NMR}$**  (101 MHz,  $\text{CDCl}_3$ )  $\delta_{\text{(ppm)}}$ : 168.1 (6-CO), 141.2 (1'- $\text{C}_{\text{Ar}}$ ), 133.5 (12a- $\text{C}_{\text{Ar}}$ ), 133.1 (3a<sup>1</sup>- $\text{C}_{\text{Ar}}$ ), 131.5 (8a- $\text{C}_{\text{Ar}}$ ), 130.6 (2- $\text{C}_{\text{Ar}}$ ), 129.5 (3a- $\text{C}_{\text{Ar}}$ ), 129.0 (3'- and 5'- $\text{C}_{\text{Ar}}$ ), 128.6 (9- $\text{C}_{\text{Ar}}$ ), 128.2 (11- $\text{C}_{\text{Ar}}$ ), 128.1 (10- $\text{C}_{\text{Ar}}$ ), 127.8 (2' and 6'- $\text{C}_{\text{Ar}}$ ), 127.3 (3- $\text{C}_{\text{Ar}}$ ), 126.7 (4'- $\text{C}_{\text{Ar}}$ ), 123.9 (12b- $\text{C}_{\text{Ar}}$ ), 123.2 (1- $\text{C}_{\text{Ar}}$ ), 123.0 (12- $\text{C}_{\text{Ar}}$ ), 42.7 (8- $\text{CH}_2$ ), 41.6 (4-CH), 38.9 (5- $\text{CH}_2$ ), 21.2 (13- $\text{CH}_3$ ). **HRMS** (ESI<sup>+</sup>):  $m/z$ : calcd for  $\text{C}_{23}\text{H}_{19}\text{NO}$  ( $[\text{M}+\text{H}]^+$ ) 326.1539, found: 326.1545.

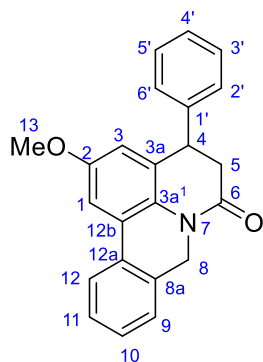

**2-Methoxy-4-phenyl-4,5-dihydro-6H,8H-pyrido[3,2,1-de]phenanthridin-6-one (4c)** was prepared according to the general procedure from 1-(2-bromobenzyl)-6-methoxy-4-phenyl-3,4-dihydroquinolin-2(1*H*)-one (**6c**) (422.32 mg, 1 mmol). 337.99 mg (0.9 mmol) of a yellow solid was obtained with a yield of 99%;  $R_f$  = 0.34 (4:1 petroleum ether/ethyl acetate); m.p. = 133–135 °C. **IR** (KBr,  $\nu_{\text{max}}/\text{cm}^{-1}$ ): 3055  $\nu(\text{C-H})$ , 2839  $\nu(\text{C-H})$ , 1666  $\nu(\text{C=O})$ , 1388  $\nu(\text{C-N})$ .  **$^1\text{H NMR}$**  (400 MHz,  $\text{CDCl}_3$ )  $\delta_{\text{(ppm)}}$ : 7.73 (d,  $J$  = 7.6 Hz, 1H, 12- $\text{H}_{\text{Ar}}$ ), 7.42–7.25 (m, 7H, 2'-, 4'-, 6'-, 1-, 9-, 10- and 11- $\text{H}_{\text{Ar}}$ ), 7.22–7.18 (m, 2H, 3'- and 5'- $\text{H}_{\text{Ar}}$ ), 6.47 (d,  $J$  = 2.7 Hz, 1H, 3- $\text{H}_{\text{Ar}}$ ), 5.07 (d,  $J$  = 15.7 Hz, 1H, 8- $\text{CH}_2$ ), 4.98 (d,  $J$  = 15.6 Hz, 1H, 8- $\text{CH}_2$ ), 4.24 (t,  $J$  = 7.1 Hz, 1H, 4-CH), 3.78 (s, 3H, 13- $\text{CH}_3$ ), 2.94 (d,  $J$  = 7.2 Hz, 2H, 5-CH).  **$^{13}\text{C NMR}$**  (101 MHz,  $\text{CDCl}_3$ )  $\delta_{\text{(ppm)}}$ : 167.9 (6-CO), 156.2 (2- $\text{C}_{\text{Ar}}$ ), 140.8 (1'- $\text{C}_{\text{Ar}}$ ), 131.8 (12a- $\text{C}_{\text{Ar}}$ ), 131.3 (8a- $\text{C}_{\text{Ar}}$ ), 130.5 (3a<sup>1</sup>- $\text{C}_{\text{Ar}}$ ), 129.16 (3a- $\text{C}_{\text{Ar}}$ ), 129.0 (3'- and 5'- $\text{C}_{\text{Ar}}$ ), 128.4 (11- $\text{C}_{\text{Ar}}$ ), 128.2 (10- $\text{C}_{\text{Ar}}$ ), 127.8 (2' and 6'- $\text{C}_{\text{Ar}}$ ), 127.4 (9- $\text{C}_{\text{Ar}}$ ), 126.7 (4'- $\text{C}_{\text{Ar}}$ ), 125.2 (12b- $\text{C}_{\text{Ar}}$ ), 123.3 (12- $\text{C}_{\text{Ar}}$ ), 114.1 (3- $\text{C}_{\text{Ar}}$ ), 107.2 (1- $\text{C}_{\text{Ar}}$ ), 55.6 (13- $\text{CH}_3$ ), 42.7 (8- $\text{CH}_2$ ), 41.8 (4-CH), 38.8 (5- $\text{CH}_2$ ). **HRMS** (ESI<sup>+</sup>):  $m/z$ : calcd for  $\text{C}_{23}\text{H}_{19}\text{NO}_2$  ( $[\text{M}+\text{H}]^+$ ) 342.1488, found: 342.1495.



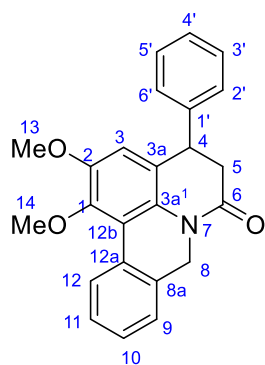

**1,2-Dimethoxy-4-phenyl-4,5-dihydro-6H,8H-pyrido[3,2,1-de]phenanthridin-6-one (4d)** was prepared according to the general procedure from 1-(2-bromobenzyl)-6,7-dimethoxy-4-phenyl-3,4-dihydroquinolin-2(1*H*)-one (**6d**) (452.35 mg, 1 mmol). 352.86 mg (0.95 mmol) of a yellow liquid was obtained with a yield of 95%;  $R_f$  = 0.30 (4:1 petroleum ether/ethyl acetate). **IR** (KBr,  $\nu_{\max}/\text{cm}^{-1}$ ): 3054  $\nu(\text{C-H})$ , 2838  $\nu(\text{C-H})$ , 1662  $\nu(\text{C=O})$ , 1387  $\nu(\text{C-N})$ .  **$^1\text{H}$  NMR** (400 MHz,  $\text{CDCl}_3$ )  $\delta(\text{ppm})$ : 8.49 (d,  $J$  = 8.1 Hz, 1H, 12- $\text{H}_{\text{Ar}}$ ), 7.38–7.33 (m, 3H, 9, 10 and 11- $\text{H}_{\text{Ar}}$ ), 7.32–7.28 (m, 3H, 2', 4' and 6'- $\text{H}_{\text{Ar}}$ ), 7.21–7.17 (m, 2H, 3'- and 5'- $\text{H}_{\text{Ar}}$ ), 6.49 (s, 1H, 3- $\text{H}_{\text{Ar}}$ ), 4.92 (s, 2H, 8- $\text{CH}_2$ ), 4.21 (t,  $J$  = 7.0 Hz, 1H, 4-CH), 3.81 (s, 3H, 13- $\text{CH}_3$ ), 3.75 (s, 3H, 14- $\text{CH}_3$ ), 2.92–2.89 (m, 2H, 5- $\text{CH}_2$ ).  **$^{13}\text{C}$  NMR** (101 MHz,  $\text{CDCl}_3$ )  $\delta(\text{ppm})$ : 167.6 (6-CO), 149.5 (2- $\text{C}_{\text{Ar}}$ ), 146.6 (1- $\text{C}_{\text{Ar}}$ ), 141.1 (1'- $\text{C}_{\text{Ar}}$ ), 132.5 (12a- $\text{C}_{\text{Ar}}$ ), 130.5 (3a'- $\text{C}_{\text{Ar}}$ ), 129.6 (3a- $\text{C}_{\text{Ar}}$ ), 129.1 (3'- and 5'- $\text{C}_{\text{Ar}}$ ), 128.2 (11- $\text{C}_{\text{Ar}}$ ), 128.1 (10- $\text{C}_{\text{Ar}}$ ), 127.8 (2'- and 6'- $\text{C}_{\text{Ar}}$ ), 127.5 (12- $\text{C}_{\text{Ar}}$ ), 127.4 (9- $\text{C}_{\text{Ar}}$ ), 126.4 (4'- $\text{C}_{\text{Ar}}$ ), 125.1 (12b- $\text{C}_{\text{Ar}}$ ), 119.2 (8a- $\text{C}_{\text{Ar}}$ ), 112.1 (3- $\text{C}_{\text{Ar}}$ ), 60.7 (13- $\text{CH}_3$ ), 56.4 (14- $\text{CH}_3$ ), 42.8 (8- $\text{CH}_2$ ), 41.9 (4-CH), 39.1 (5- $\text{CH}_2$ ). **HRMS** (ESI+):  $m/z$ : calcd for  $\text{C}_{24}\text{H}_{21}\text{NO}_3$  ( $[\text{M}+\text{H}]^+$ ) 372.1594, found: 372.1605

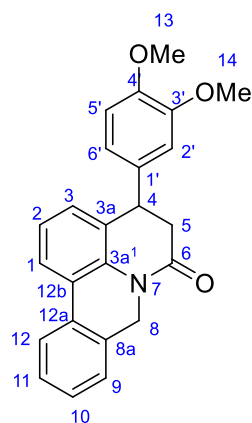

**4-(3,4-Dimethoxyphenyl)-4,5-dihydro-6H,8H-pyrido[3,2,1-de]phenanthridin-6-one (4e)** was prepared according to the general procedure from 1-(2-bromobenzyl)-4-(3,4-dimethoxyphenyl)-3,4-dihydroquinolin-2(1*H*)-one (**6e**) (452.35 mg, 1 mmol). 334.3 mg (0.90 mmol) of a yellow liquid was obtained with a yield of 90%;  $R_f$  = 0.26 (4:1 petroleum ether/ethyl acetate). **IR** (KBr,  $\nu_{\max}/\text{cm}^{-1}$ ): 3053  $\nu(\text{C-H})$ , 2837  $\nu(\text{C-H})$ , 1665  $\nu(\text{C=O})$ , 1388  $\nu(\text{C-N})$ .  **$^1\text{H}$  NMR** (400 MHz,  $\text{CDCl}_3$ )  $\delta(\text{ppm})$ : 7.75 (t,  $J$  = 7.6 Hz, 2H, 6'- and 5'- $\text{H}_{\text{Ar}}$ ), 7.40–7.35 (m, 1H, 12- $\text{H}_{\text{Ar}}$ ), 7.33–7.28 (m, 2H, 3- and 1- $\text{H}_{\text{Ar}}$ ), 7.09 (t,  $J$  = 7.7 Hz, 1H, 2- $\text{H}_{\text{Ar}}$ ), 6.91 (dt,  $J$  = 7.5, 1.2 Hz, 1H, 9- $\text{H}_{\text{Ar}}$ ), 6.83 (d,  $J$  = 8.0 Hz, 1H, 11- $\text{H}_{\text{Ar}}$ ), 6.75–6.71 (m, 2H, 10- and 2'- $\text{H}_{\text{Ar}}$ ), 5.04 (q, 1H, 8- $\text{CH}_2$ ), 4.22 (t,  $J$  = 7.4 Hz, 1H, 4-CH), 3.87 (s, 3H, 13- $\text{CH}_3$ ), 3.82 (s, 3H, 14- $\text{CH}_3$ ), 2.94 (d,  $J$  = 7.9 Hz, 1H, 5- $\text{CH}_2$ ).  **$^{13}\text{C}$  NMR** (101 MHz,  $\text{CDCl}_3$ )  $\delta(\text{ppm})$ : 168.4 (6-CO), 149.3 (4'- $\text{C}_{\text{Ar}}$ ), 148.3 (3'- $\text{C}_{\text{Ar}}$ ), 135.3 (1'- $\text{C}_{\text{Ar}}$ ), 133.4 (3a'- $\text{C}_{\text{Ar}}$ ), 131.5 (12a- $\text{C}_{\text{Ar}}$ ), 130.6 (8a- $\text{C}_{\text{Ar}}$ ), 130.1 (3a- $\text{C}_{\text{Ar}}$ ), 128.3 (12- and 9- $\text{C}_{\text{Ar}}$ ), 127.8 (11- $\text{C}_{\text{Ar}}$ ), 126.7 (10- $\text{C}_{\text{Ar}}$ ), 124.1 (12b- $\text{C}_{\text{Ar}}$ ), 124.0 (3- $\text{C}_{\text{Ar}}$ ), 123.2 (1- $\text{C}_{\text{Ar}}$ ), 122.6 (2- $\text{C}_{\text{Ar}}$ ), 120.0 (5'- $\text{C}_{\text{Ar}}$ ), 111.6 (6'- $\text{C}_{\text{Ar}}$ ), 110.9 (2'- $\text{C}_{\text{Ar}}$ ), 56.0 (13- $\text{CH}_3$ ), 56.0 (14- $\text{CH}_3$ ), 42.69 (8- $\text{CH}_2$ ), 41.3 (4-CH), 38.9 (5- $\text{CH}_2$ ). **HRMS** (ESI+):  $m/z$ : calcd for  $\text{C}_{24}\text{H}_{21}\text{NO}_3$  ( $[\text{M}+\text{H}]^+$ ) 372.1594, found: 372.1601.



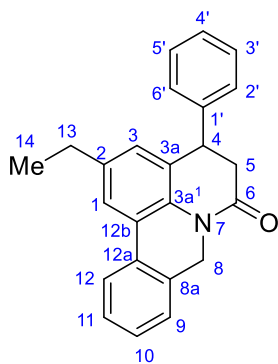

**2-Ethyl-4-phenyl-4,5-dihydro-6H,8H-pyrido[3,2,1-de]phenanthridin-6-one (4f)** was prepared according to the general procedure from 1-(2-bromobenzyl)-6-ethyl-4-phenyl-3,4-dihydroquinolin-2(1*H*)-one **6f** (420.35 mg, 1 mmol). 315.67 mg (0.93 mmol) of a yellow solid was obtained with a yield of 93%;  $R_f$  = 0.50 (4:1 petroleum ether/ethyl acetate); m.p. = 143–146 °C. **IR** (KBr,  $\nu_{\text{max}}/\text{cm}^{-1}$ ): 3023.89  $\nu(\text{C-H})$ , 2962.18  $\nu(\text{C-H})$ , 1666.23  $\nu(\text{C=O})$ , 1373.09  $\nu(\text{C-N})$ .  **$^1\text{H NMR}$**  (400 MHz,  $\text{CDCl}_3$ )  $\delta(\text{ppm})$ : 7.79 (d,  $J$  = 7.6 Hz, 1H, 12- $\text{H}_{\text{Ar}}$ ), 7.59 (d,  $J$  = 1.5 Hz, 1H, 1- $\text{H}_{\text{Ar}}$ ), 7.41–7.33 (m, 3H, 3'-, 5'- and 11- $\text{H}_{\text{Ar}}$ ), 7.33–7.26 (m, 3H, 4'-, 9- and 10- $\text{H}_{\text{Ar}}$ ), 7.23–7.17 (m, 2H, 2'- and 6'- $\text{H}_{\text{Ar}}$ ), 6.75 (d,  $J$  = 0.9 Hz, 1H, 3- $\text{H}_{\text{Ar}}$ ), 5.04 (s, 2H, 8- $\text{CH}_2$ ), 4.26 (t,  $J$  = 7.0 Hz, 1H, 4-CH), 2.95 (d,  $J$  = 7.0 Hz, 2H, 5- $\text{CH}_2$ ), 2.61 (q,  $J$  = 7.6 Hz, 2H, 13- $\text{CH}_2$ ), 1.22 (t,  $J$  = 7.6 Hz, 3H, 14- $\text{CH}_3$ ).  **$^{13}\text{C NMR}$**  (101 MHz,  $\text{CDCl}_3$ )  $\delta(\text{ppm})$ : 168.1 (6-CO), 141.2 (1'- $\text{C}_{\text{Ar}}$ ), 140.0 (2- $\text{C}_{\text{Ar}}$ ), 133.2 (3a'- $\text{C}_{\text{Ar}}$ ), 131.5 (12a- $\text{C}_{\text{Ar}}$ ), 130.7(8a- $\text{C}_{\text{Ar}}$ ), 129.6 (3a- $\text{C}_{\text{Ar}}$ ), 129.0 (3' and 5'- $\text{C}_{\text{Ar}}$ ), 128.1 (11- $\text{C}_{\text{Ar}}$ ), 128.1 (10- $\text{C}_{\text{Ar}}$ ), 127.8 (2'- and 6'- $\text{C}_{\text{Ar}}$ ), 127.5 (9- $\text{C}_{\text{Ar}}$ ), 127.3 (3- $\text{C}_{\text{Ar}}$ ), 126.7 (4'- $\text{C}_{\text{Ar}}$ ), 124.0 (12b- $\text{C}_{\text{Ar}}$ ), 123.2 (12- $\text{C}_{\text{Ar}}$ ), 121.8 (1- $\text{C}_{\text{Ar}}$ ), 42.6 (8- $\text{CH}_2$ ), 41.7 (4-CH), 38.9 (5- $\text{CH}_2$ ), 28.6 (13- $\text{CH}_2$ ), 15.8 (14- $\text{CH}_3$ ). **DEPT 135** (101 MHz,  $\text{CDCl}_3$ )  $\delta(\text{ppm})$ : 129.0 (3'- and 5'- $\text{C}_{\text{Ar}}$ ), 128.1 (11- $\text{C}_{\text{Ar}}$ ), 128.1 (10- $\text{C}_{\text{Ar}}$ ), 127.8 (2'- and 6'- $\text{C}_{\text{Ar}}$ ), 127.5 (9- $\text{C}_{\text{Ar}}$ ), 127.3 (3- $\text{C}_{\text{Ar}}$ ), 126.7 (4'- $\text{C}_{\text{Ar}}$ ), 123.2 (12- $\text{C}_{\text{Ar}}$ ), 121.8 (1- $\text{C}_{\text{Ar}}$ ), 42.6 (8- $\text{CH}_2$ ), 41.7 (4-CH), 38.9 (5- $\text{CH}_2$ ), 28.6 (13- $\text{CH}_2$ ), 15.8 (14- $\text{CH}_3$ ). **COSY** [ $\delta\text{H}/\delta\text{H}$ ]: 1.22/2.61 [14- $\text{CH}_3$ /13- $\text{CH}_2$ ], 2.95/4.26 [5- $\text{CH}_2$ /4-CH], 6.75/7.59 [3- $\text{H}_{\text{Ar}}$ /1- $\text{H}_{\text{Ar}}$ ], 7.23–7.17/7.41–7.33 [3'- and 5'- $\text{H}_{\text{Ar}}$ /2'- and 6'- $\text{H}_{\text{Ar}}$ ], 7.41–7.33/7.79 [11- $\text{H}_{\text{Ar}}$ /12- $\text{H}_{\text{Ar}}$ ]. **HSQC** [ $\delta\text{H}/\delta\text{C}$ ]: 1.22/15.8 [14- $\text{CH}_3$ /14- $\text{CH}_3$ ], 2.61/28.6 [13- $\text{CH}_2$ /13- $\text{CH}_2$ ], 2.95/38.9 [5- $\text{CH}_2$ /5- $\text{CH}_2$ ], 4.26/41.7 [4-CH/4-CH], 5.04/42.6 [8- $\text{CH}_2$ /8- $\text{CH}_2$ ], 6.75/127.3 [3- $\text{H}_{\text{Ar}}$ /3- $\text{C}_{\text{Ar}}$ ], 7.23–7.17/127.8 [2'- and 6'- $\text{H}_{\text{Ar}}$ /2'- and 6'- $\text{C}_{\text{Ar}}$ ], 7.33–7.26/126.7 [4'- $\text{H}_{\text{Ar}}$ /4'- $\text{C}_{\text{Ar}}$ ], 7.41–7.33/128.1/ 129.0 [3'-, 5'- and 11- $\text{H}_{\text{Ar}}$ /11'- $\text{C}_{\text{Ar}}$ /3'- and 5'- $\text{C}_{\text{Ar}}$ ], 7.59/121.8 [1- $\text{H}_{\text{Ar}}$ /1- $\text{C}_{\text{Ar}}$ ], 7.79/123.2 [12- $\text{H}_{\text{Ar}}$ /12- $\text{C}_{\text{Ar}}$ ]. **HMBC** [ $\delta\text{H}/\delta\text{C}$ ]: 1.22/28.63/140.0 [14- $\text{CH}_3$ /13- $\text{CH}_2$ /2- $\text{C}_{\text{Ar}}$ ], 2.61/15.8/121.8/127.3/ 140.0 [13- $\text{CH}_2$ /14- $\text{CH}_3$ /1- $\text{C}_{\text{Ar}}$ /3- $\text{C}_{\text{Ar}}$ /2- $\text{C}_{\text{Ar}}$ ], 2.95/ 41.7/129.6/141.2/168.1 [5- $\text{CH}_2$ /4-CH/3a- $\text{C}_{\text{Ar}}$ /1'- $\text{C}_{\text{Ar}}$ /6-CO], 4.26/38.9/ 129.0/133.2/141.2/ 168.1 [4-CH/5- $\text{CH}_2$ /2' and 6'- $\text{C}_{\text{Ar}}$ /3a'- $\text{C}_{\text{Ar}}$ /1'- $\text{C}_{\text{Ar}}$ /6-CO], 5.04/127.5/130.7/133.2/168.1[8- $\text{CH}_2$ /9- $\text{C}_{\text{Ar}}$ /8a- $\text{C}_{\text{Ar}}$ /3a'- $\text{C}_{\text{Ar}}$ /6-CO], 6.75/28.6/41.7/121.8/133.2 [3- $\text{H}_{\text{Ar}}$ /13- $\text{CH}_2$ /4-CH/1- $\text{C}_{\text{Ar}}$ /3a'- $\text{C}_{\text{Ar}}$ ], 7.23–7.17/41.7/127.3 [2'- and 6'- $\text{H}_{\text{Ar}}$ /4-CH/3- $\text{C}_{\text{Ar}}$ ], 7.33–7.26/41.7/123.2/128.1/ 130.7/141.2 [4'-, 9- and 10- $\text{H}_{\text{Ar}}$ /4-CH/12- $\text{C}_{\text{Ar}}$ /11- $\text{C}_{\text{Ar}}$ /8a- $\text{C}_{\text{Ar}}$ /1'- $\text{C}_{\text{Ar}}$ ], 7.41–7.33/127.8/141.2 [3', 5' and 11- $\text{H}_{\text{Ar}}$ /2'- and 6'- $\text{C}_{\text{Ar}}$ /1'- $\text{C}_{\text{Ar}}$ ], 7.59/28.6/127.3/131.5/133.2 [1- $\text{H}_{\text{Ar}}$ /13- $\text{CH}_2$ /12a- $\text{C}_{\text{Ar}}$ /3a'- $\text{C}_{\text{Ar}}$ ], 7.79/124.0/ 128.1/131.5 [12- $\text{H}_{\text{Ar}}$ /12b- $\text{C}_{\text{Ar}}$ /11- $\text{C}_{\text{Ar}}$ /12a- $\text{C}_{\text{Ar}}$ ]. **HRMS** (ESI+):  $m/z$ : calcd for  $\text{C}_{24}\text{H}_{21}\text{NO}$  ( $[\text{M}+\text{H}]^+$ ) 340.1695, found: 340.1702.

**7. Figures S1-S16 of the respective  $^1\text{H}$  and  $^{13}\text{C}$  NMR spectra of all synthesized *N*-arylcinnamamides 8a-f**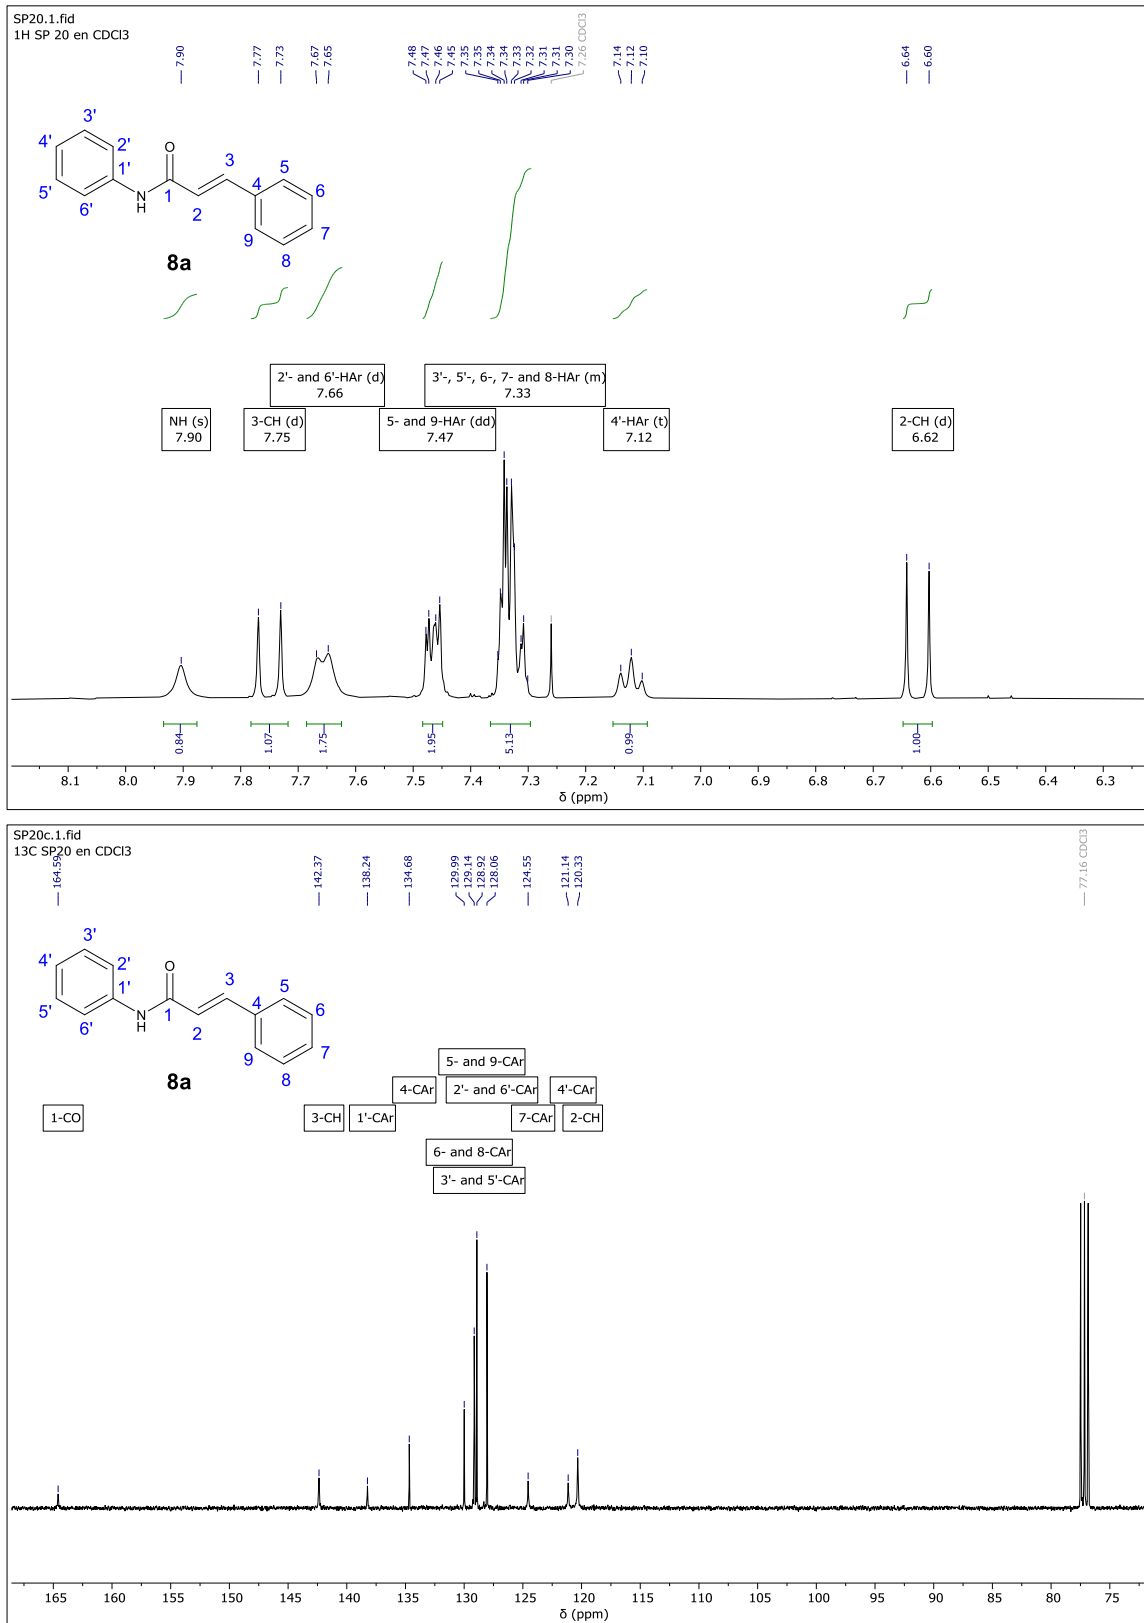

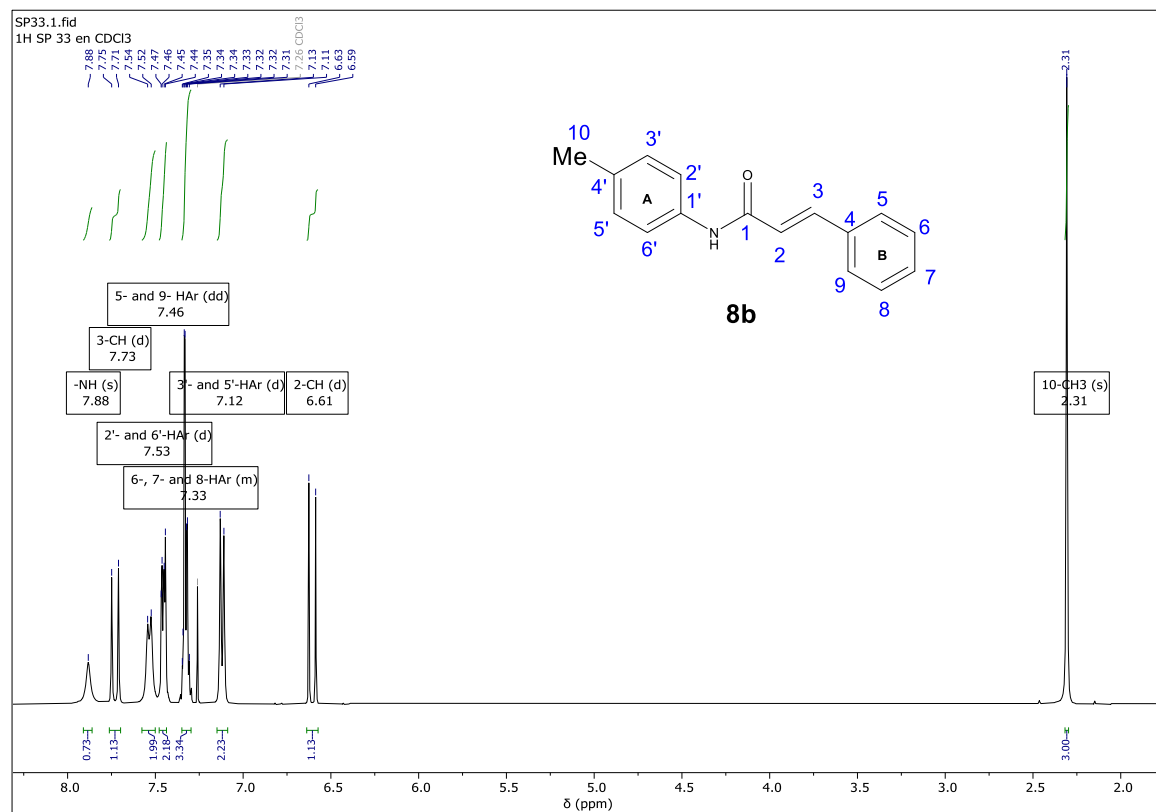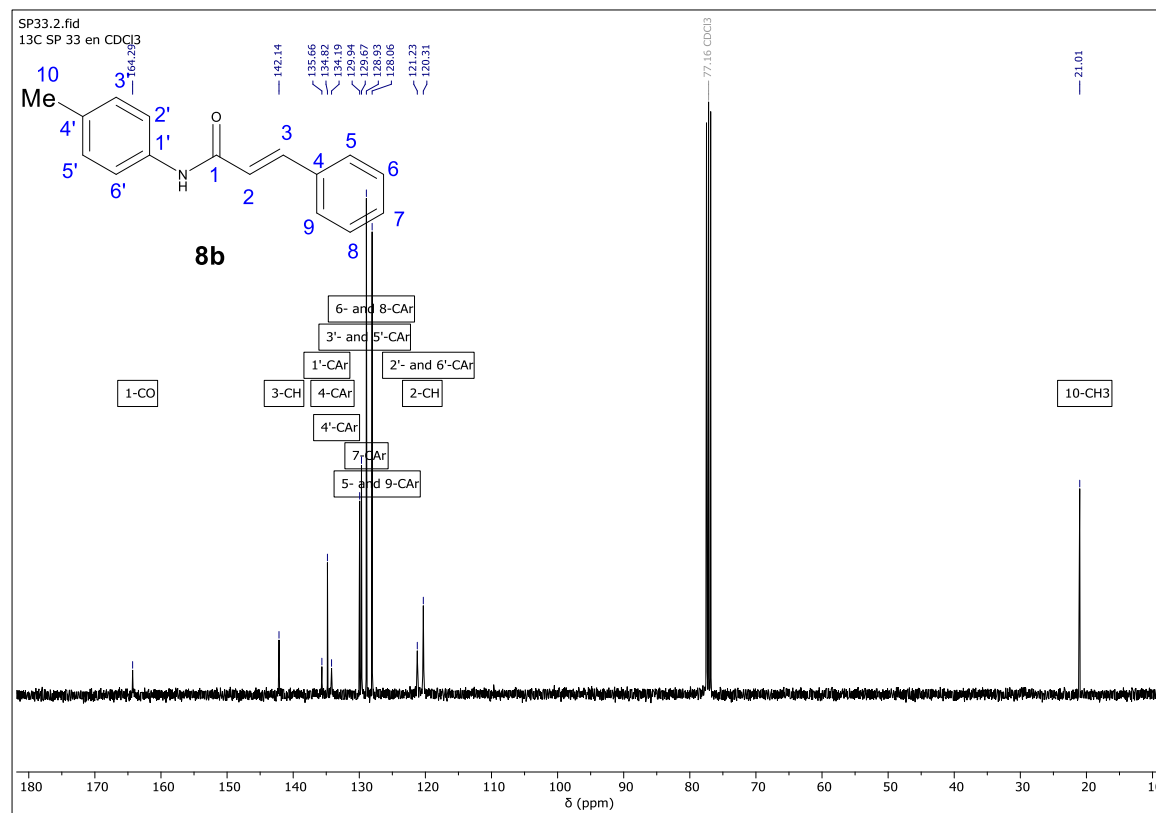

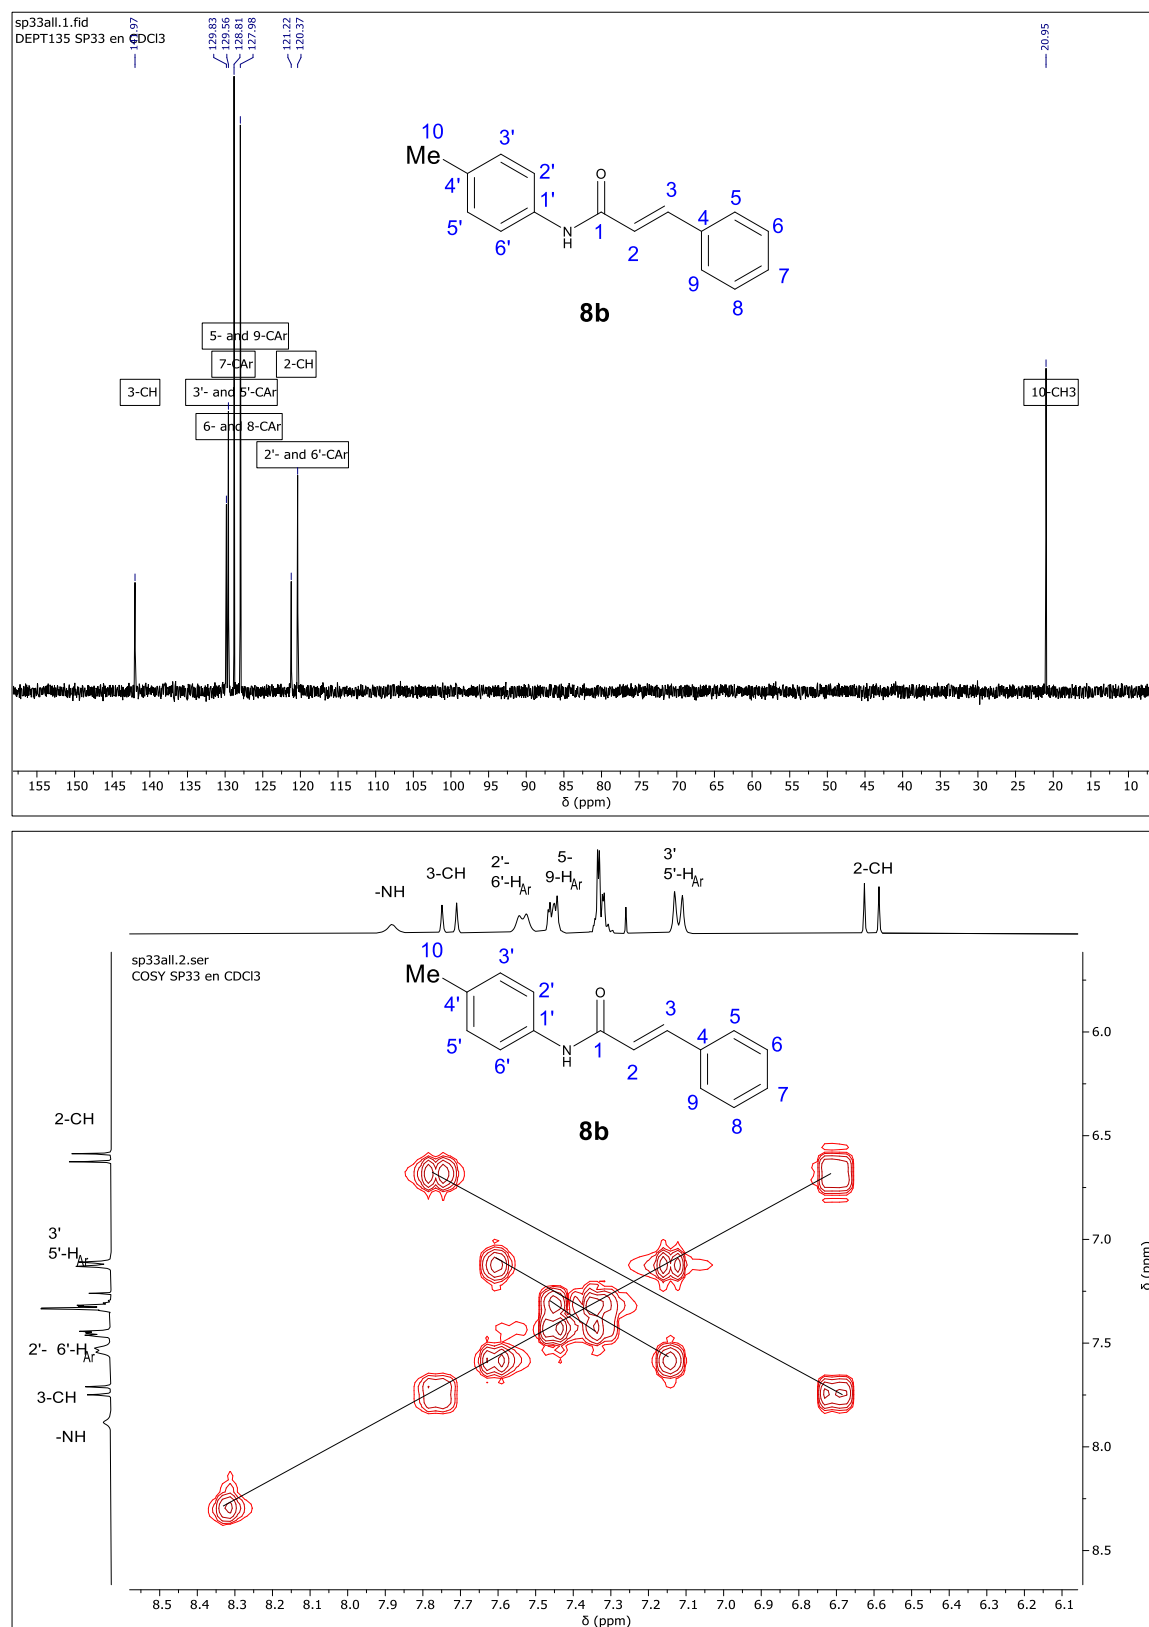

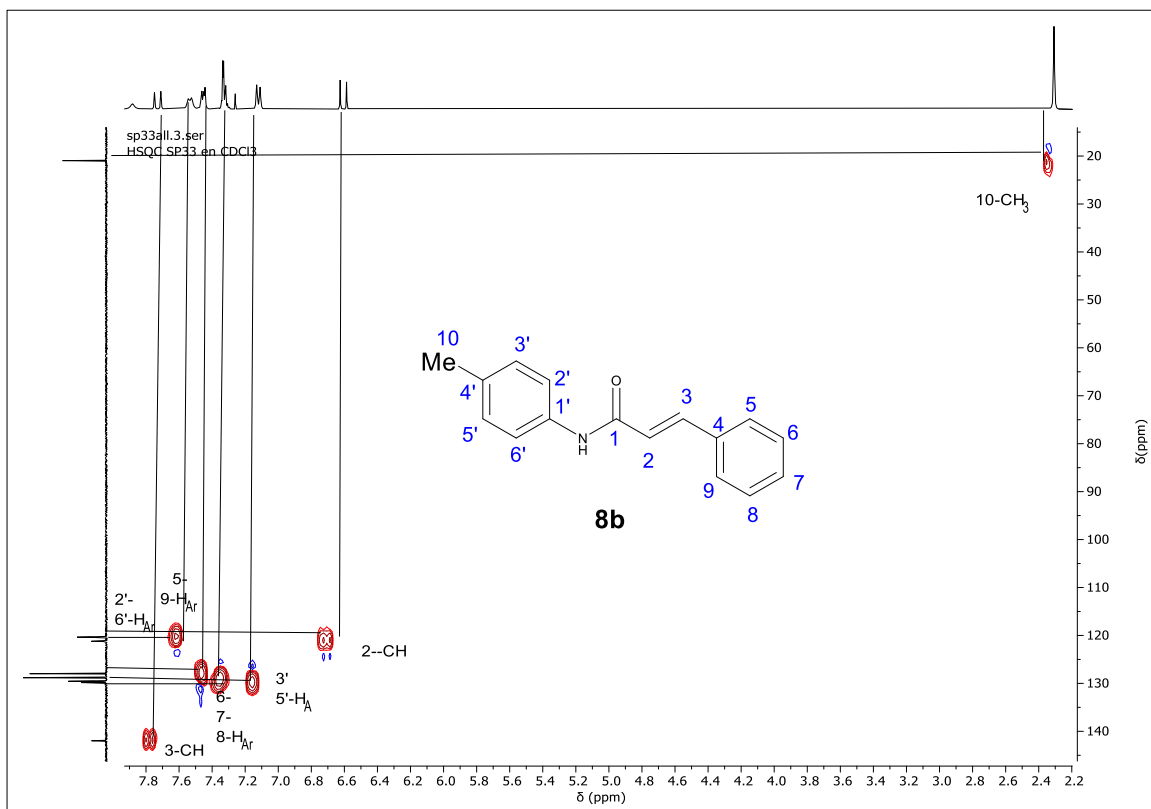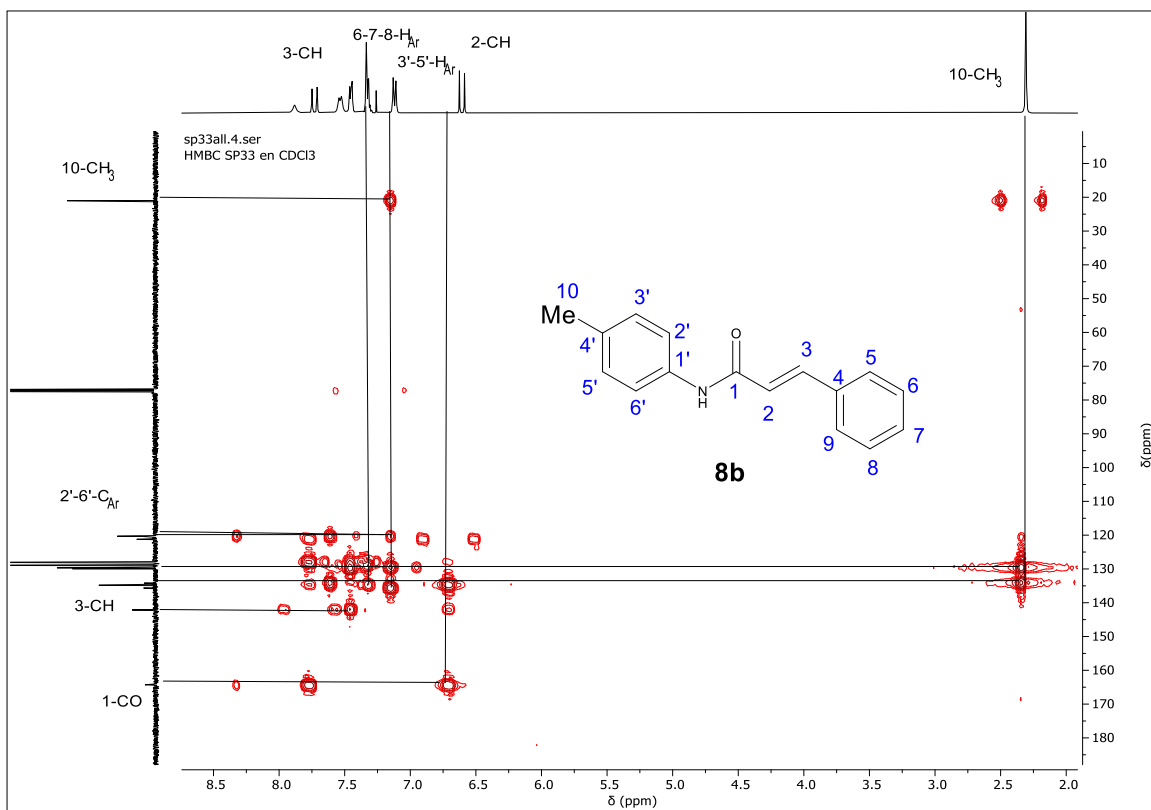

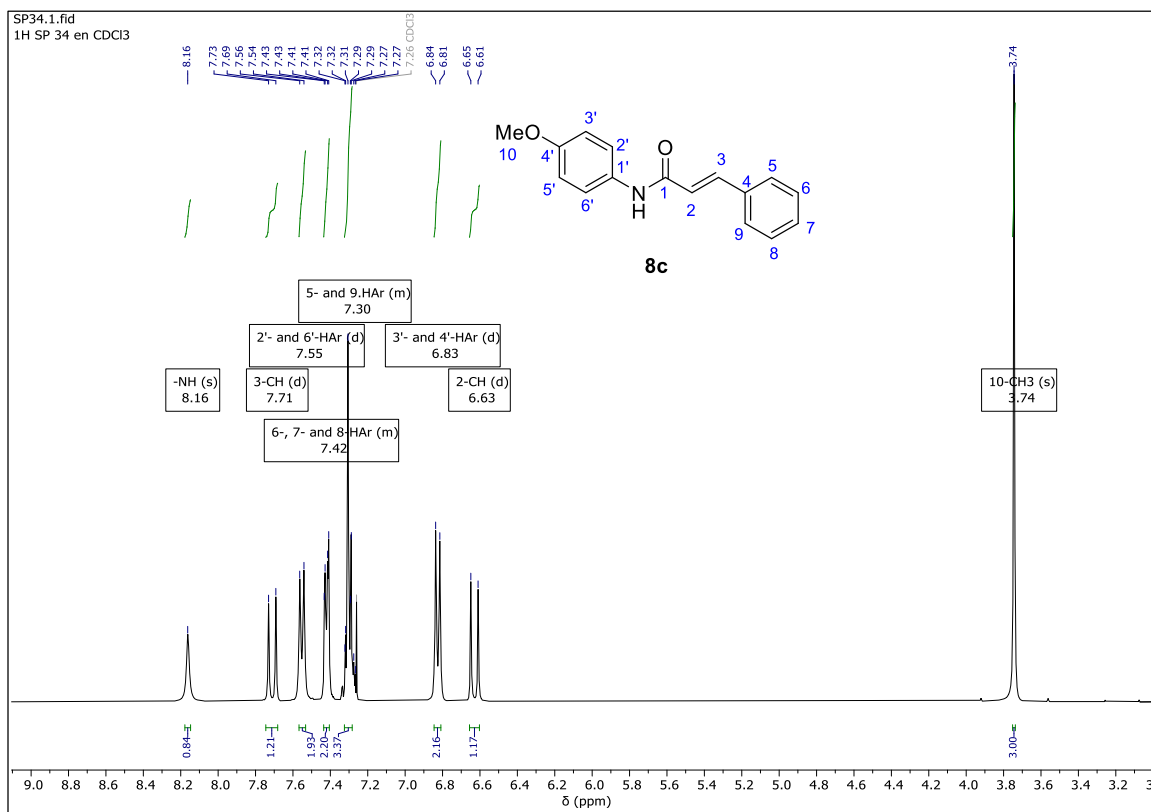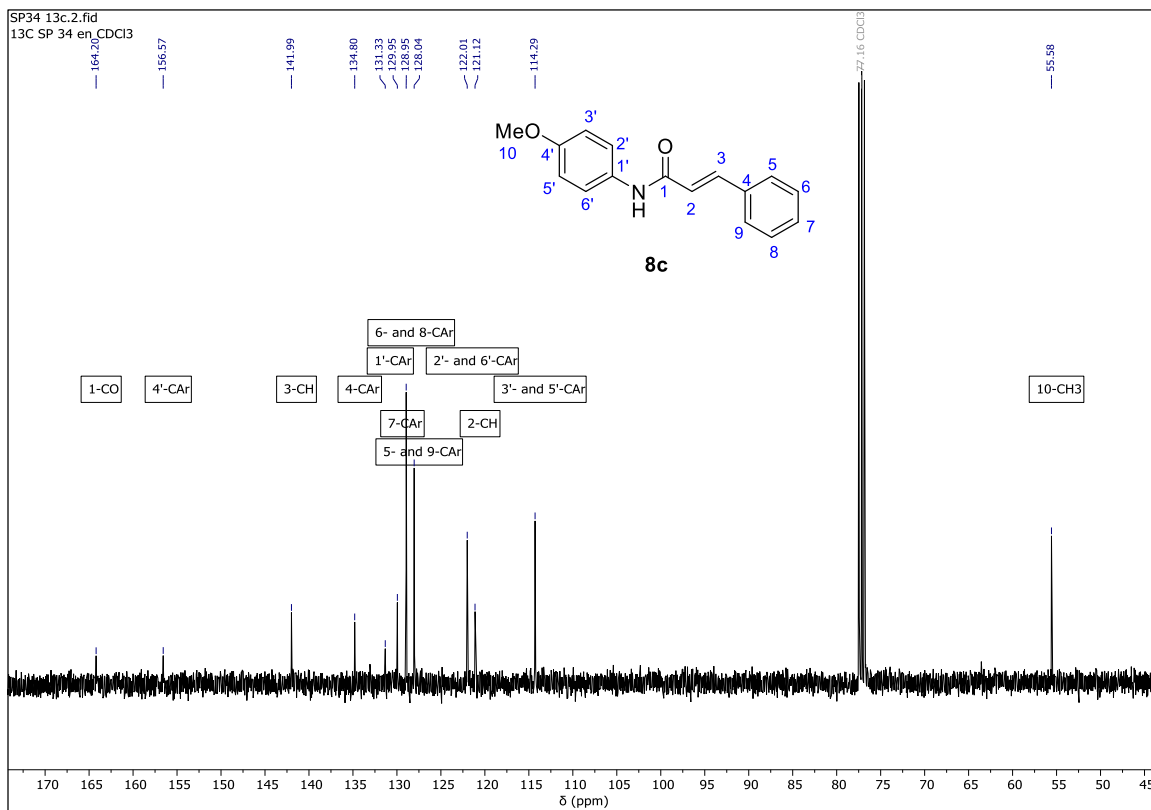



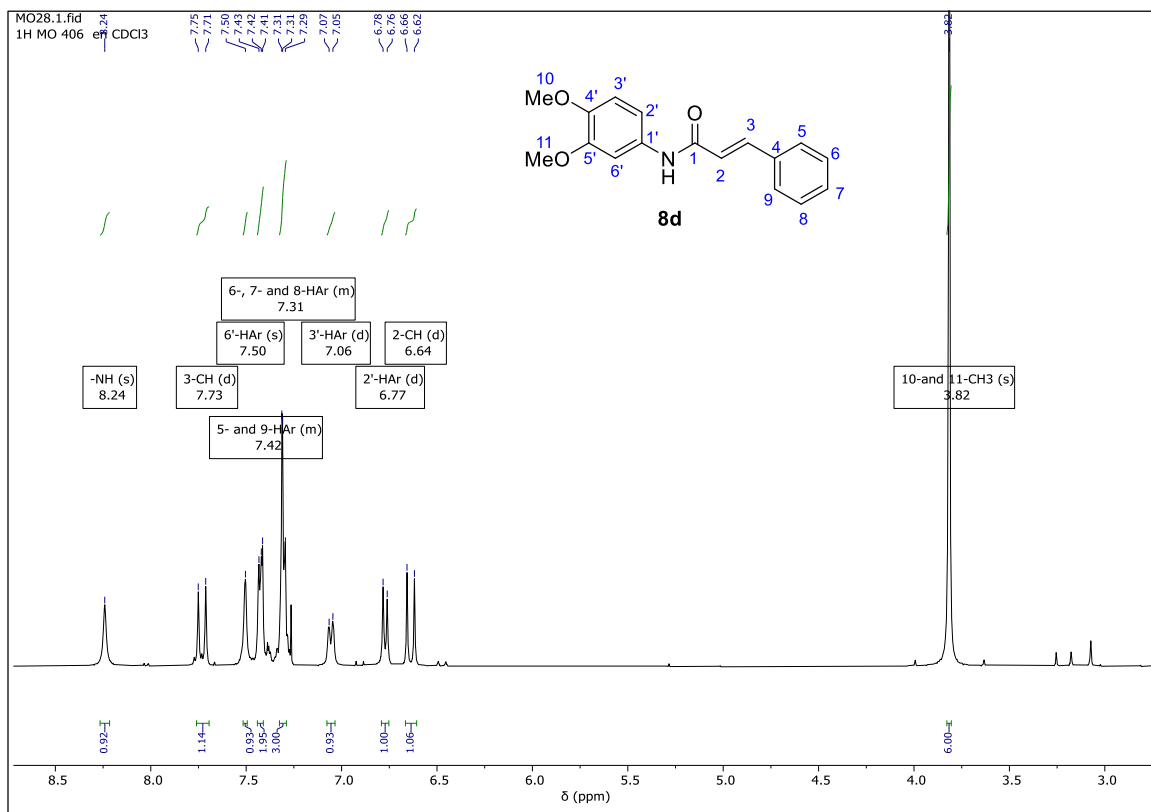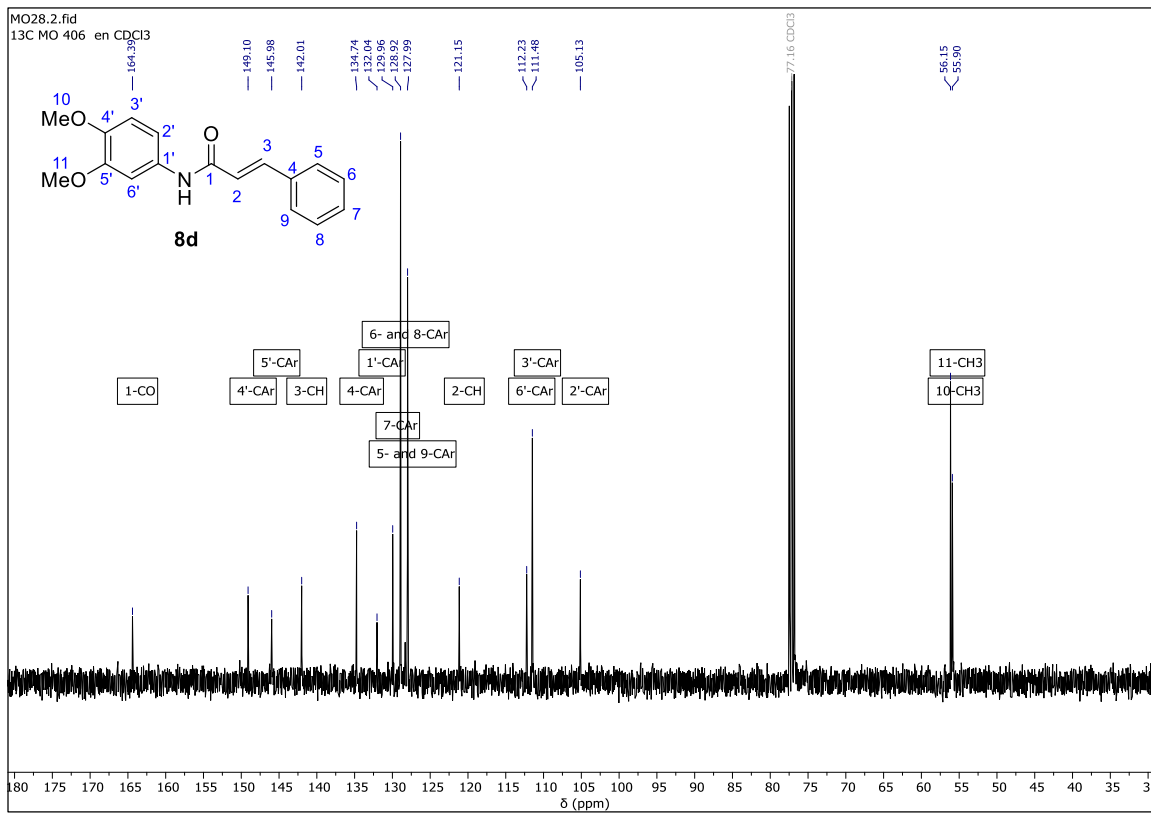

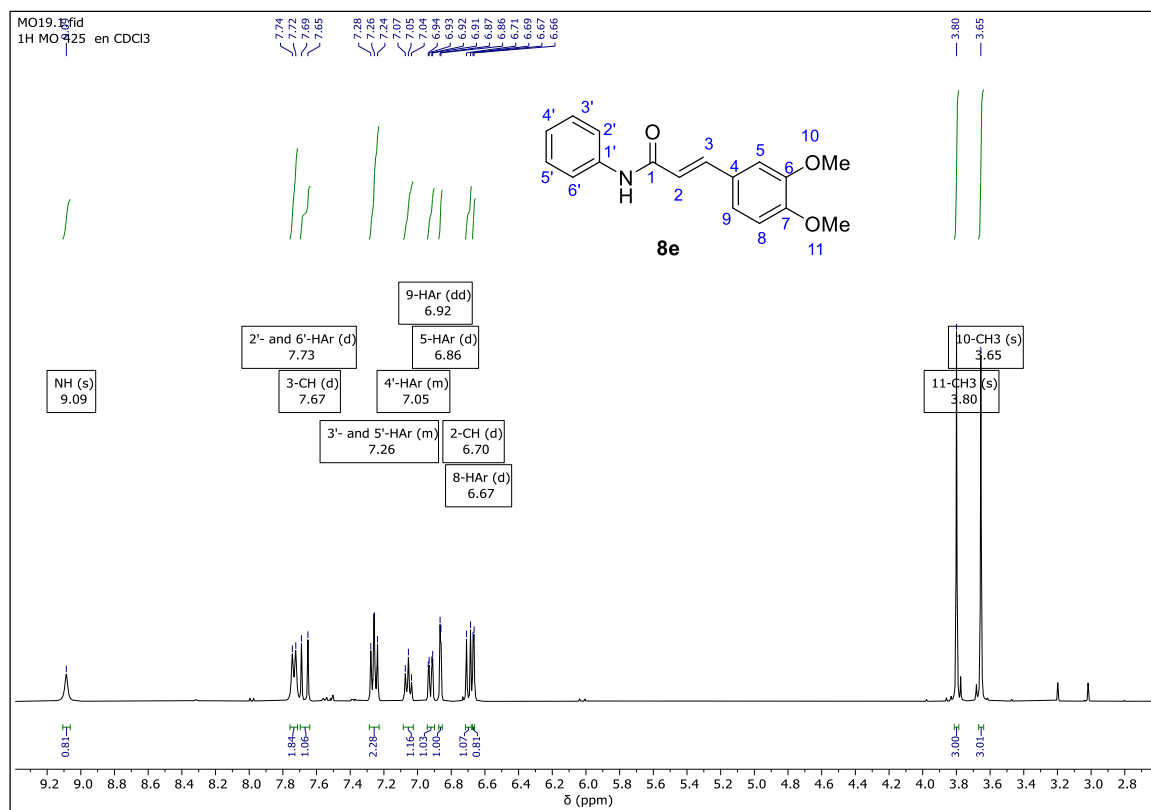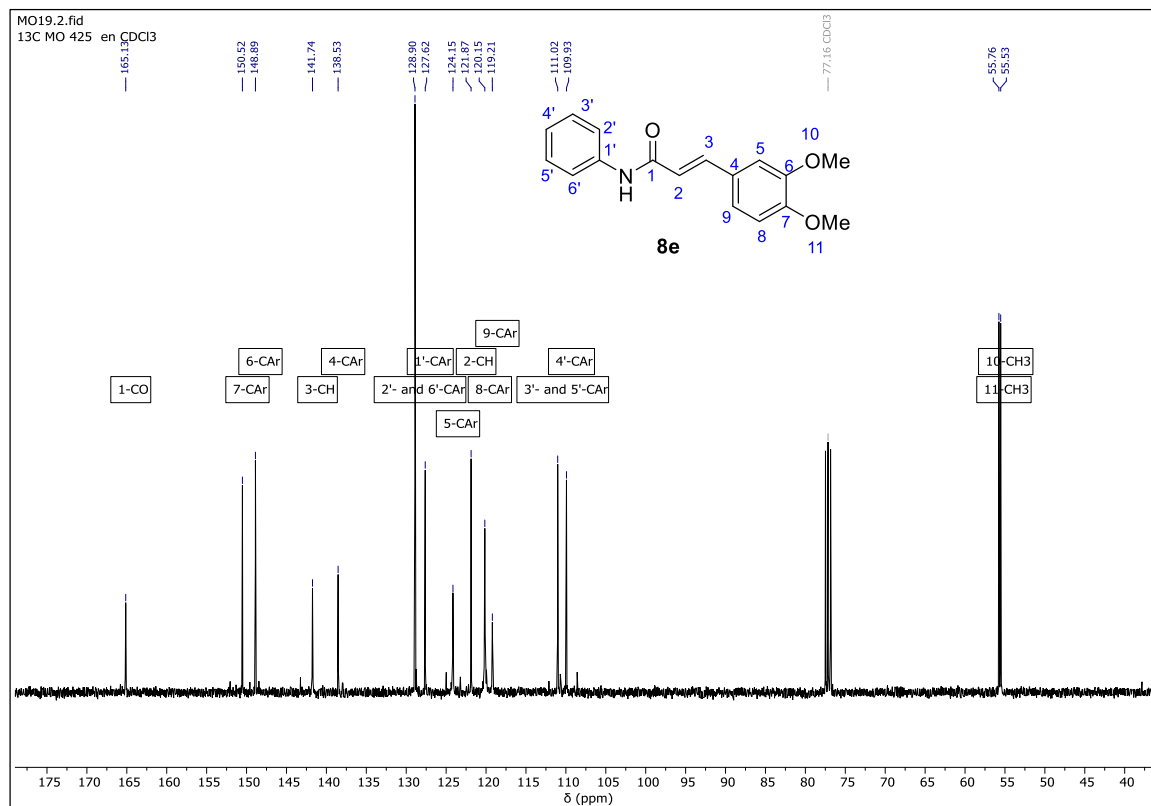

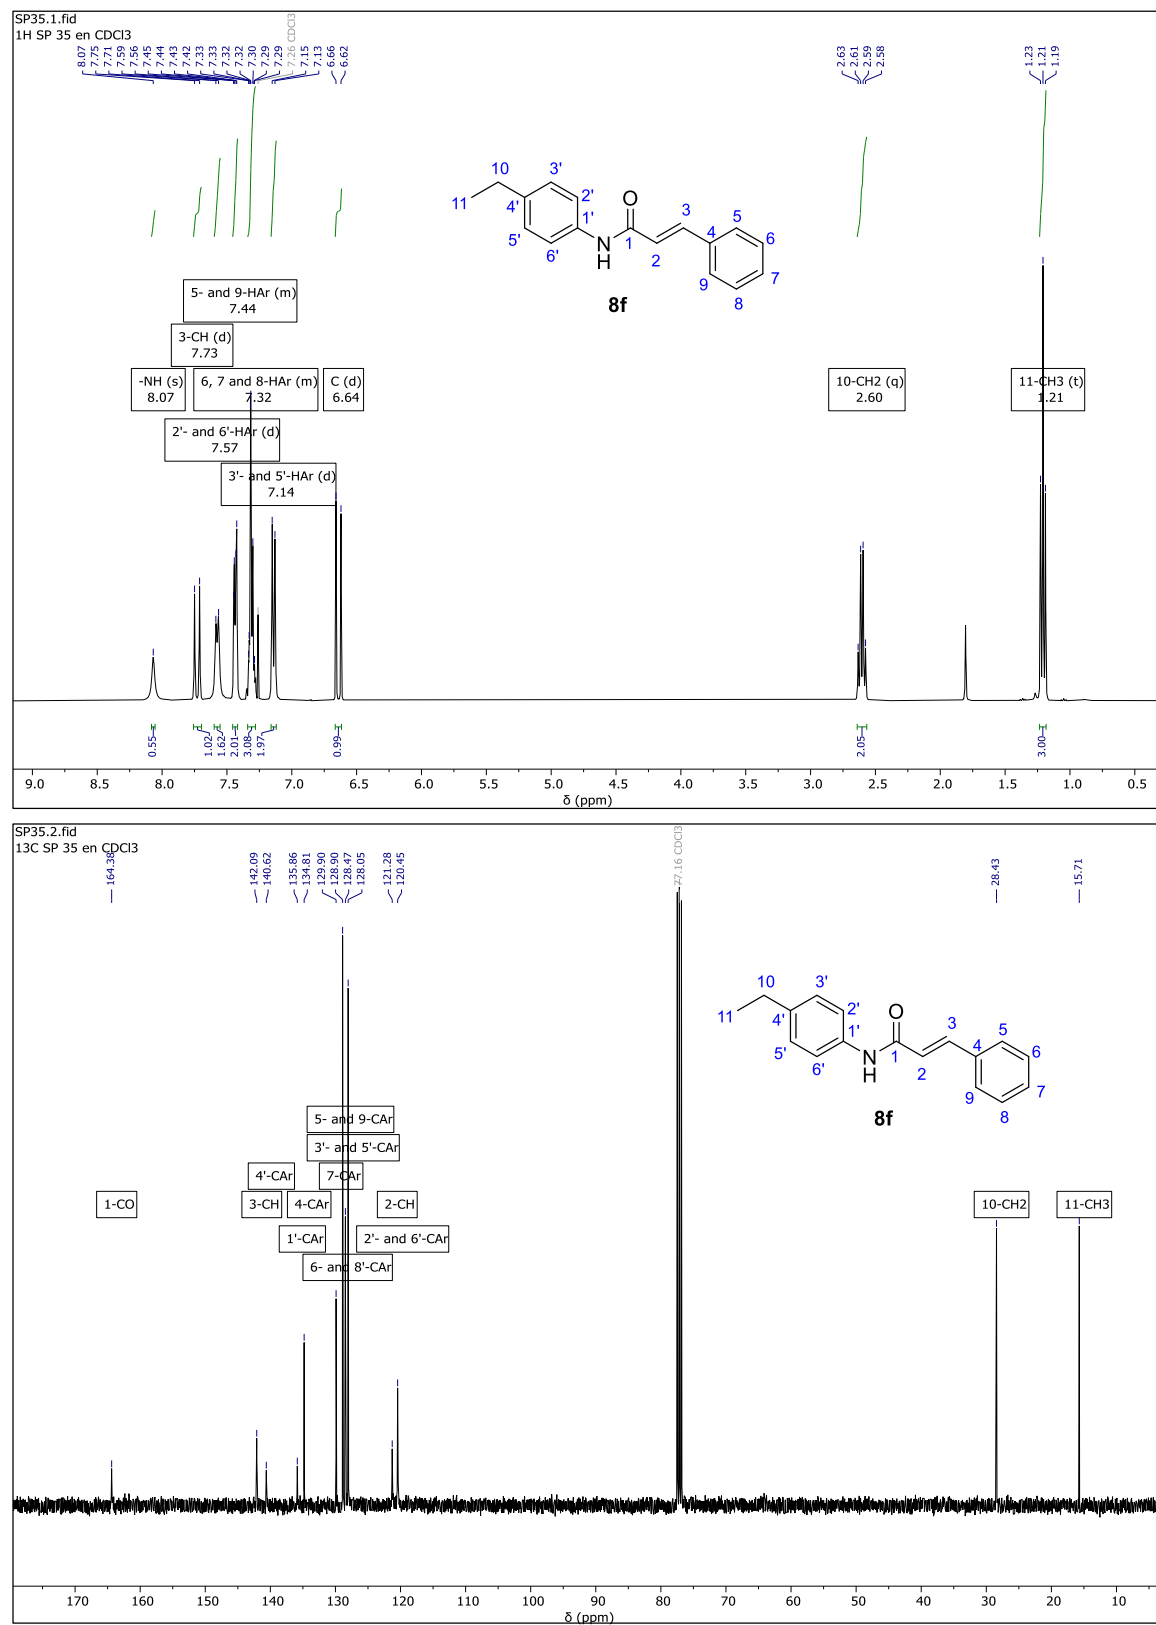

8. Figures S17-S32 of the respective  $^1\text{H}$  and  $^{13}\text{C}$  NMR spectra of all synthesized *N*-(2-bromobenzyl)-*N*-phenylcinnamamides **7a-f**

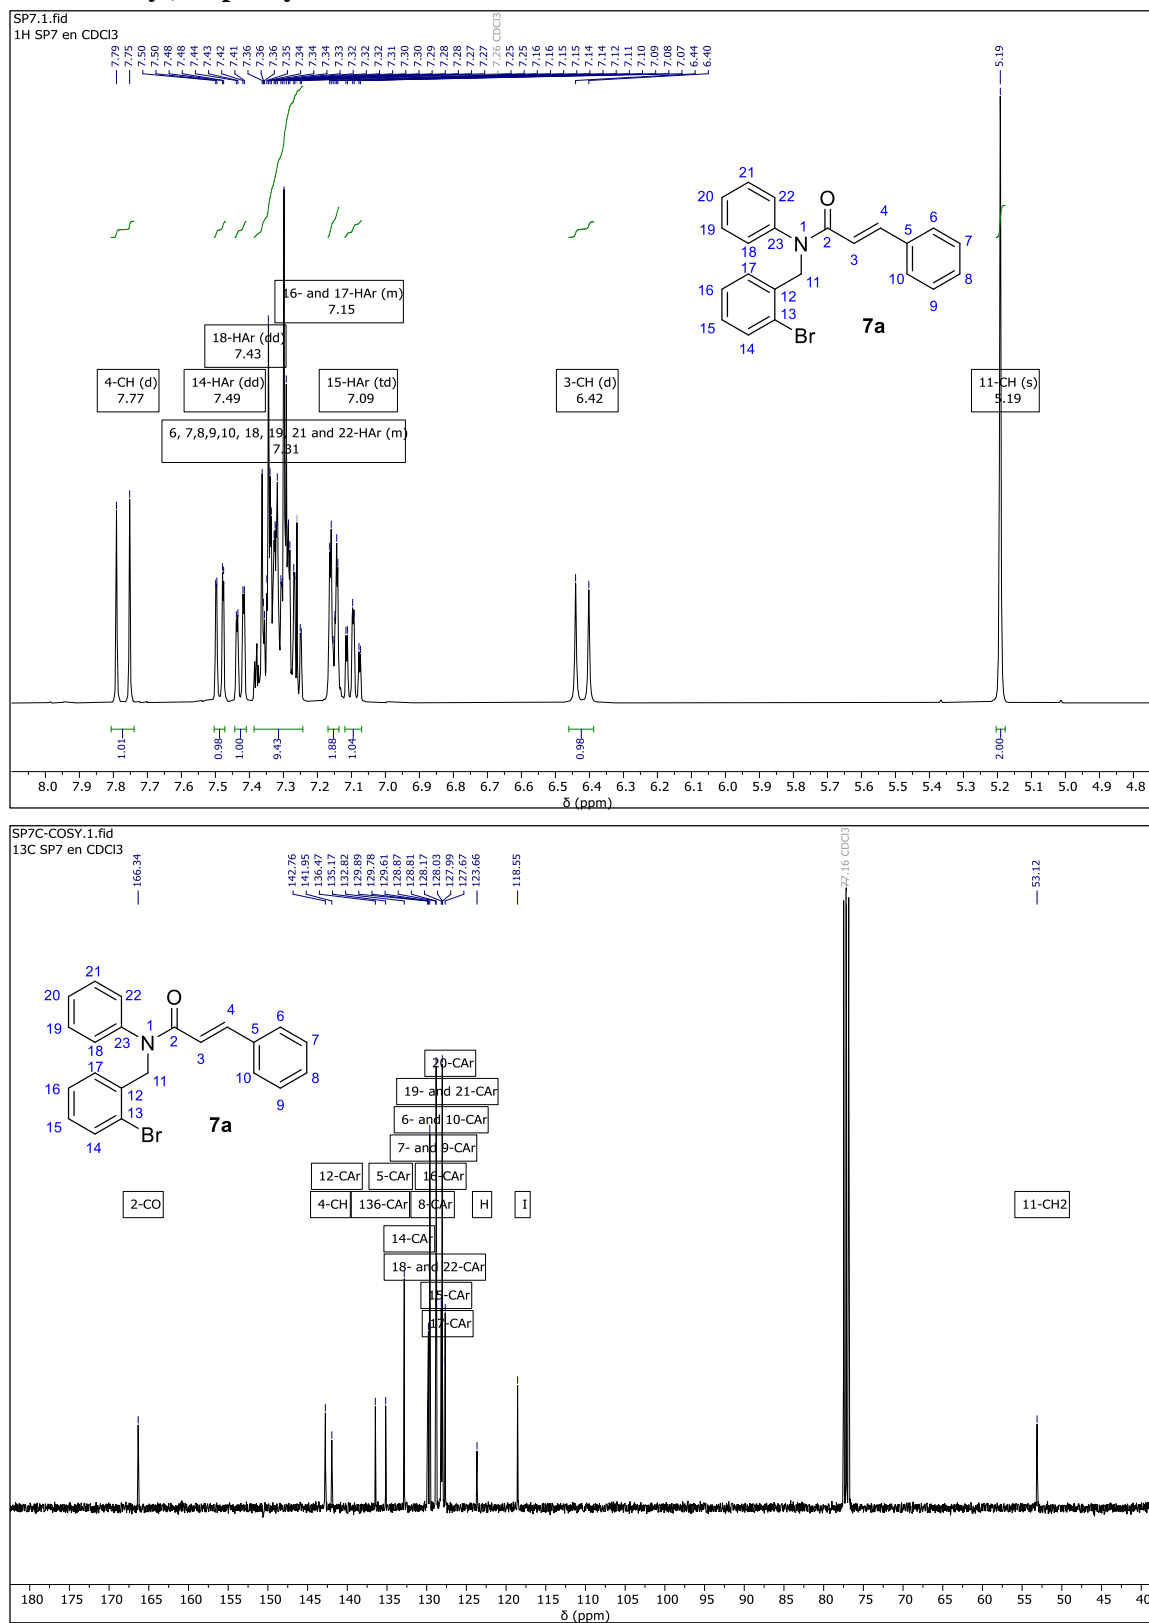

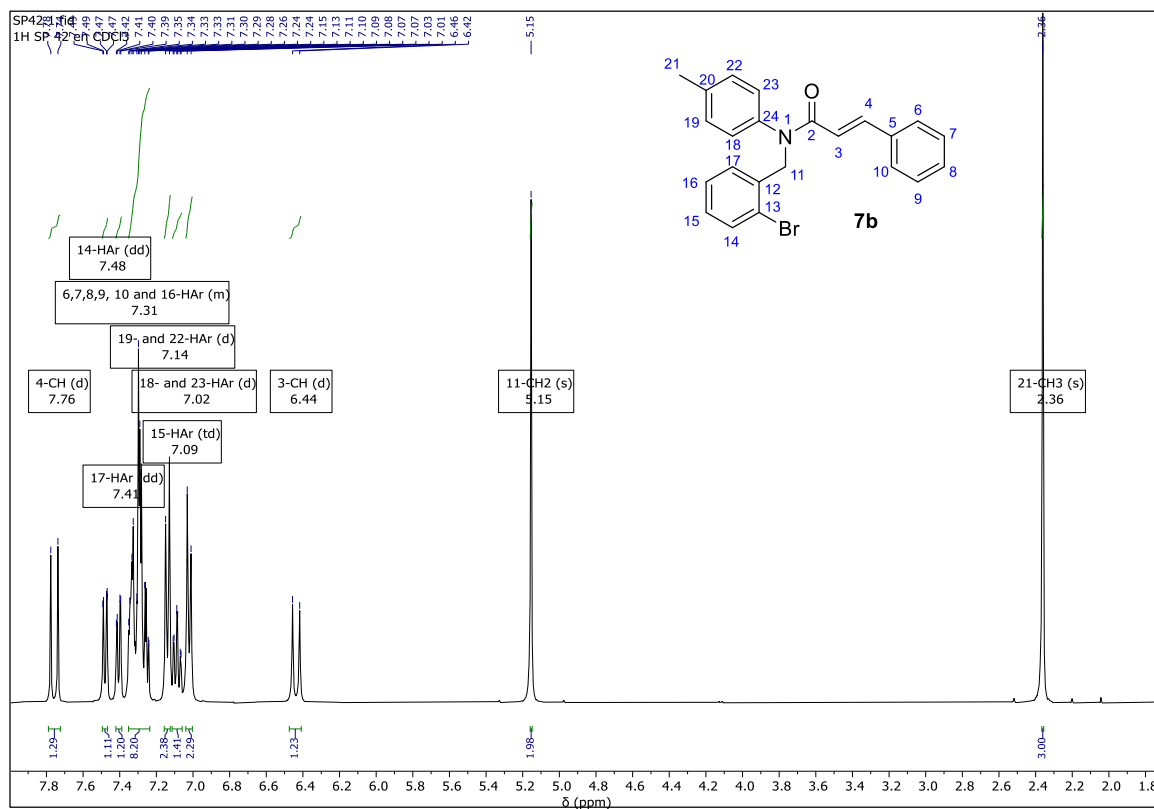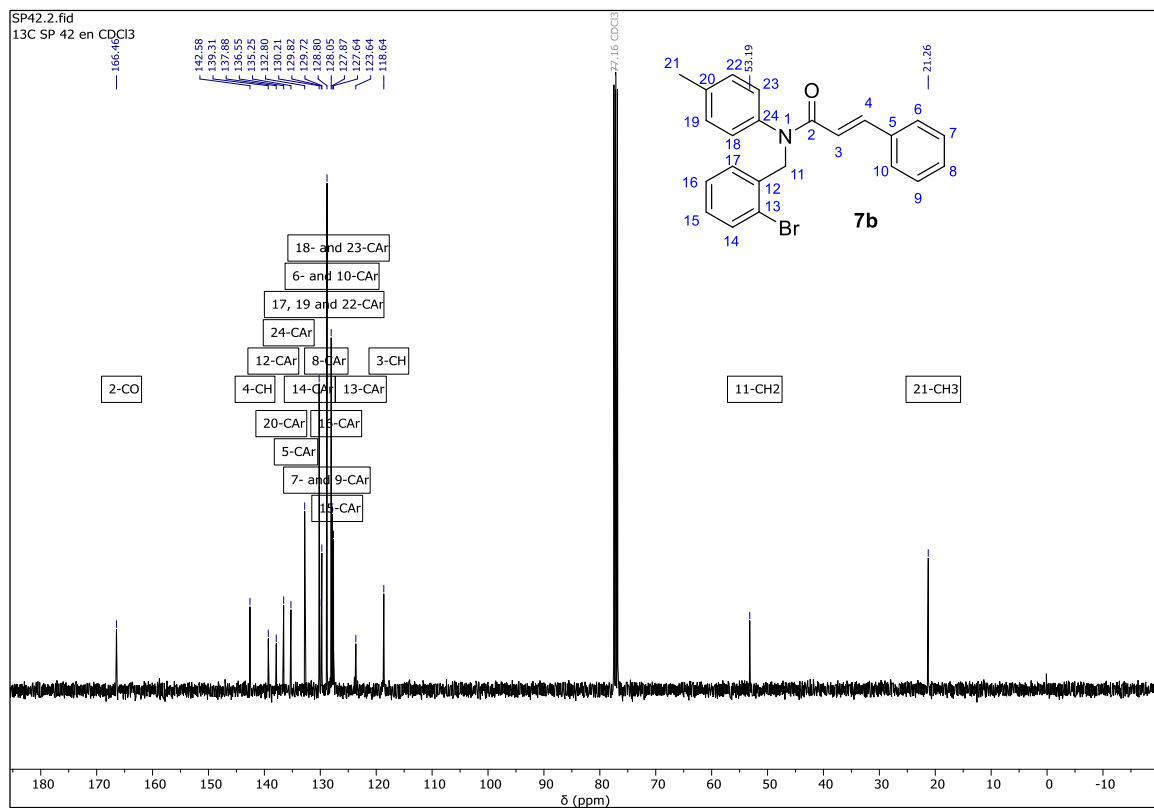

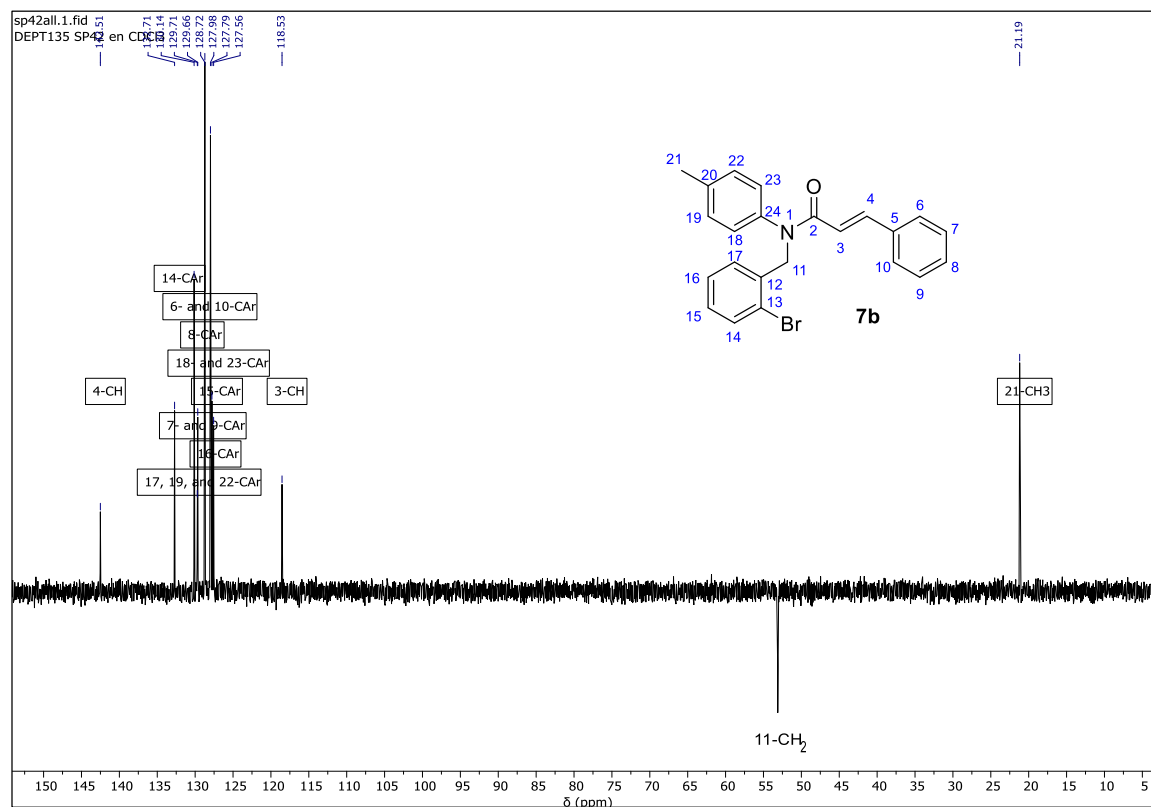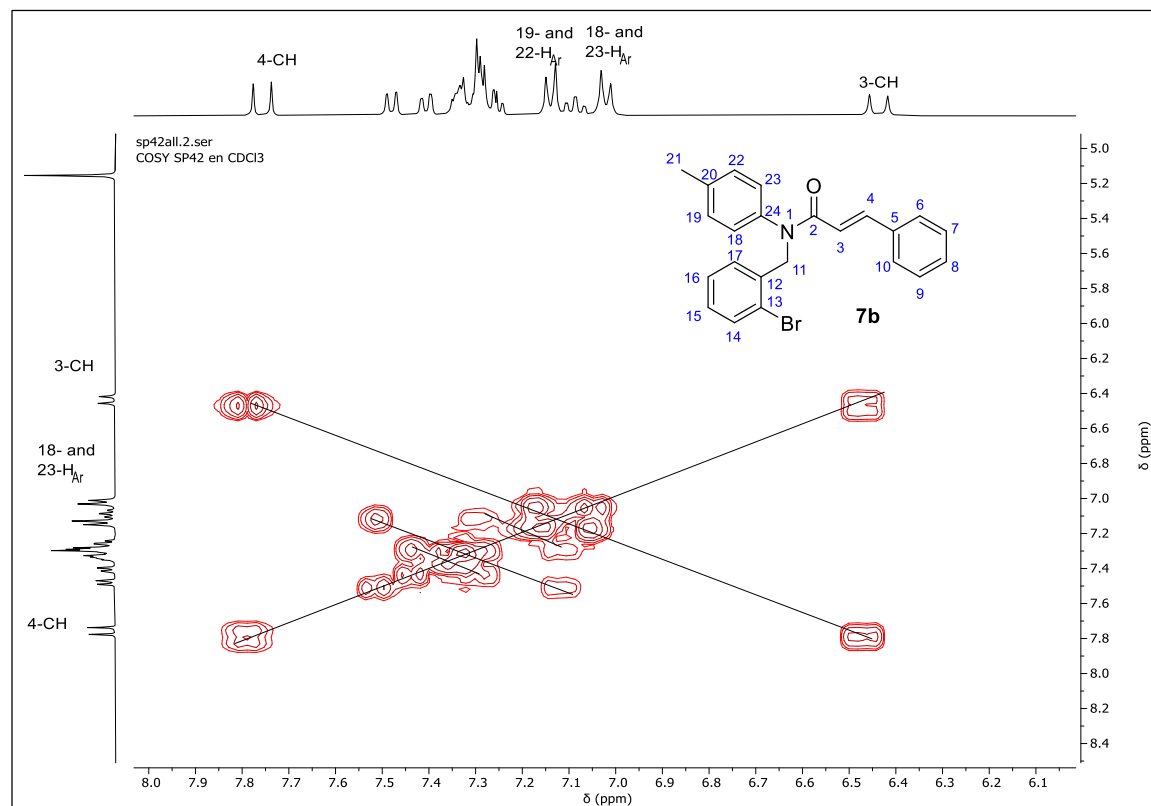



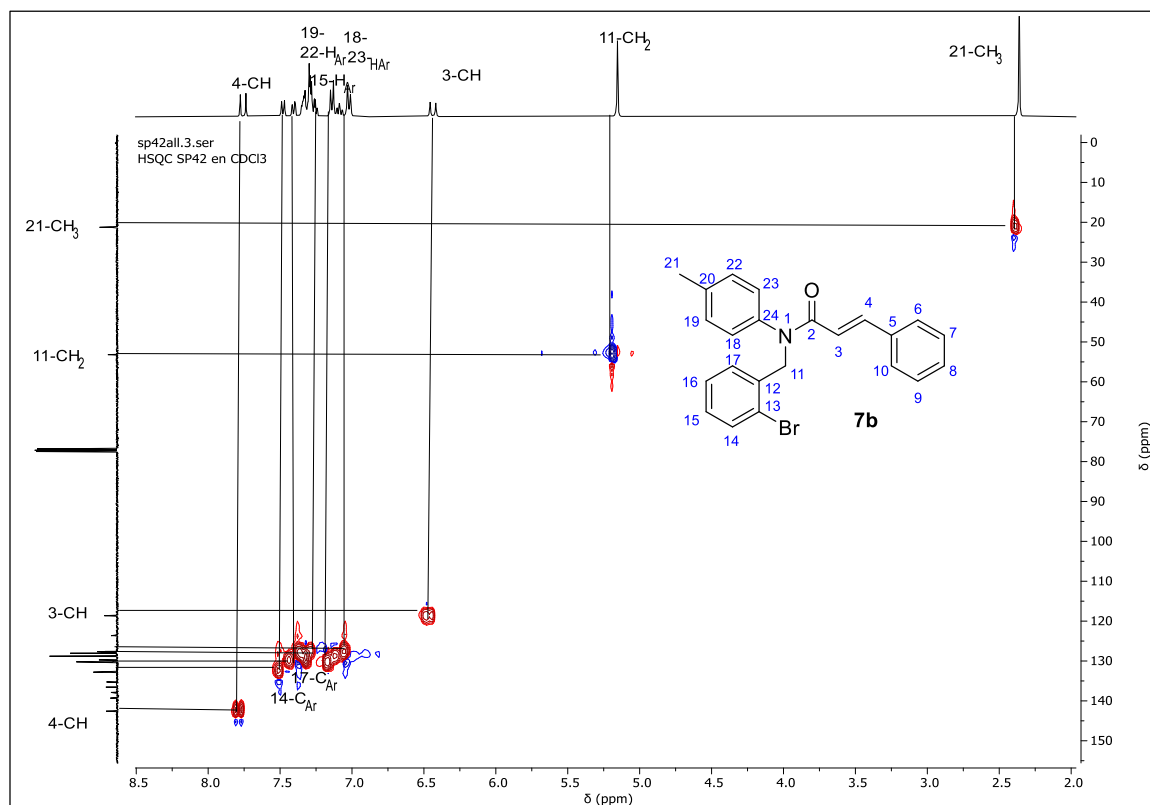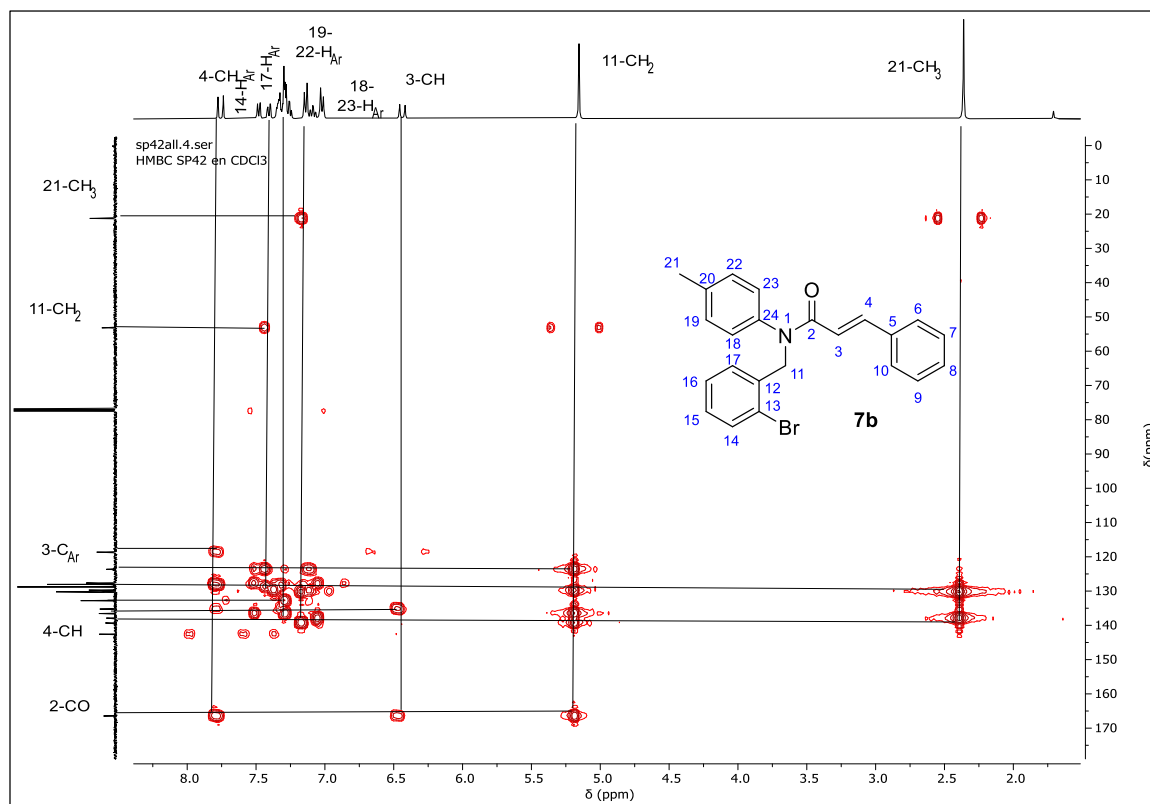

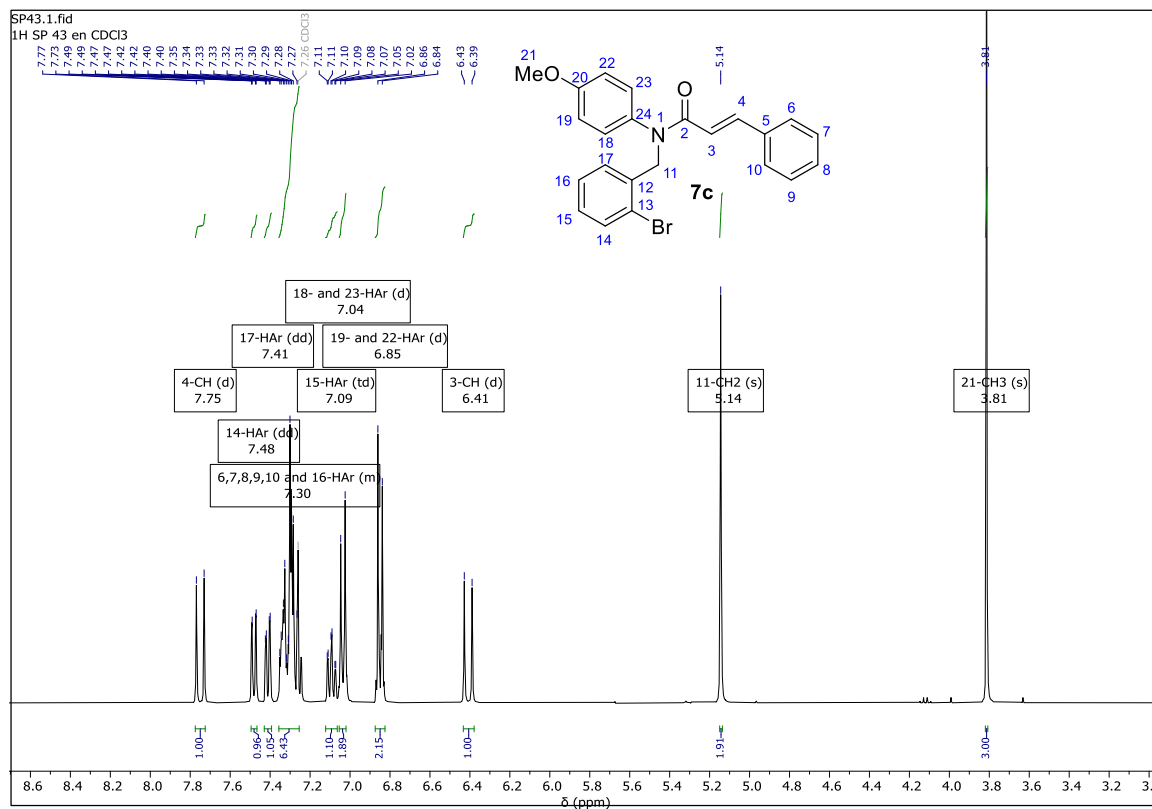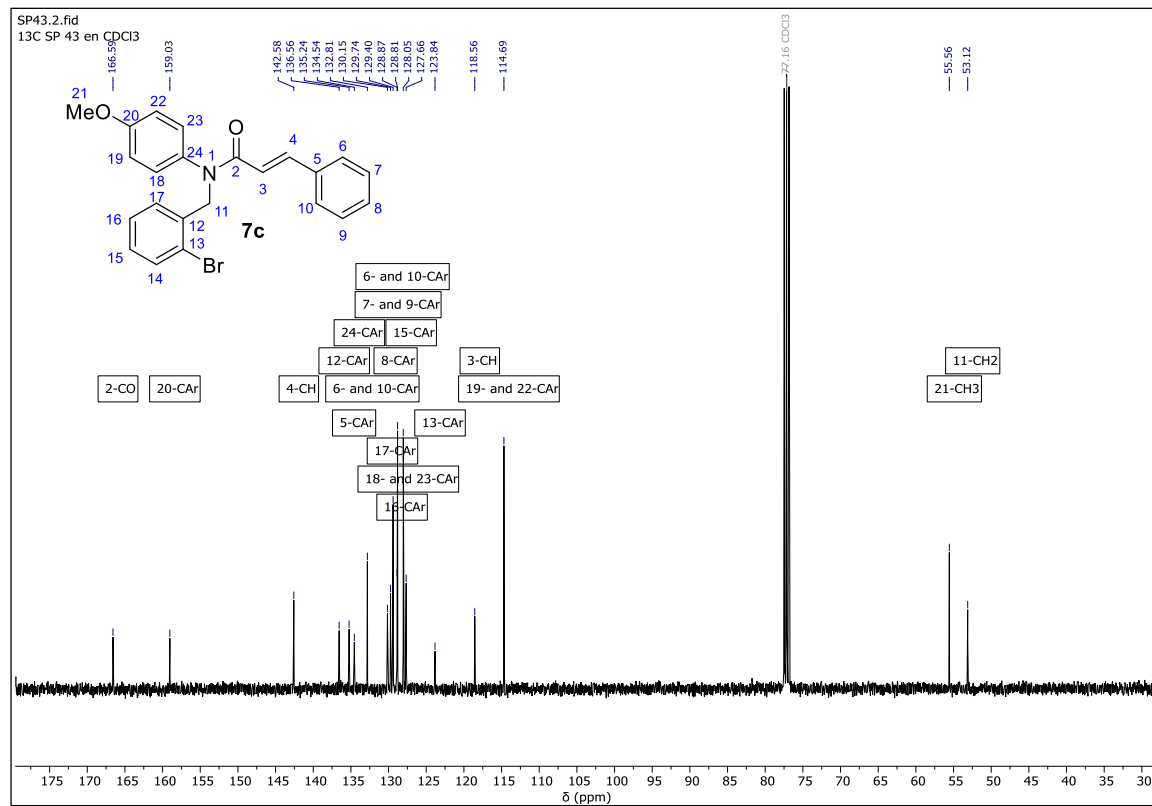

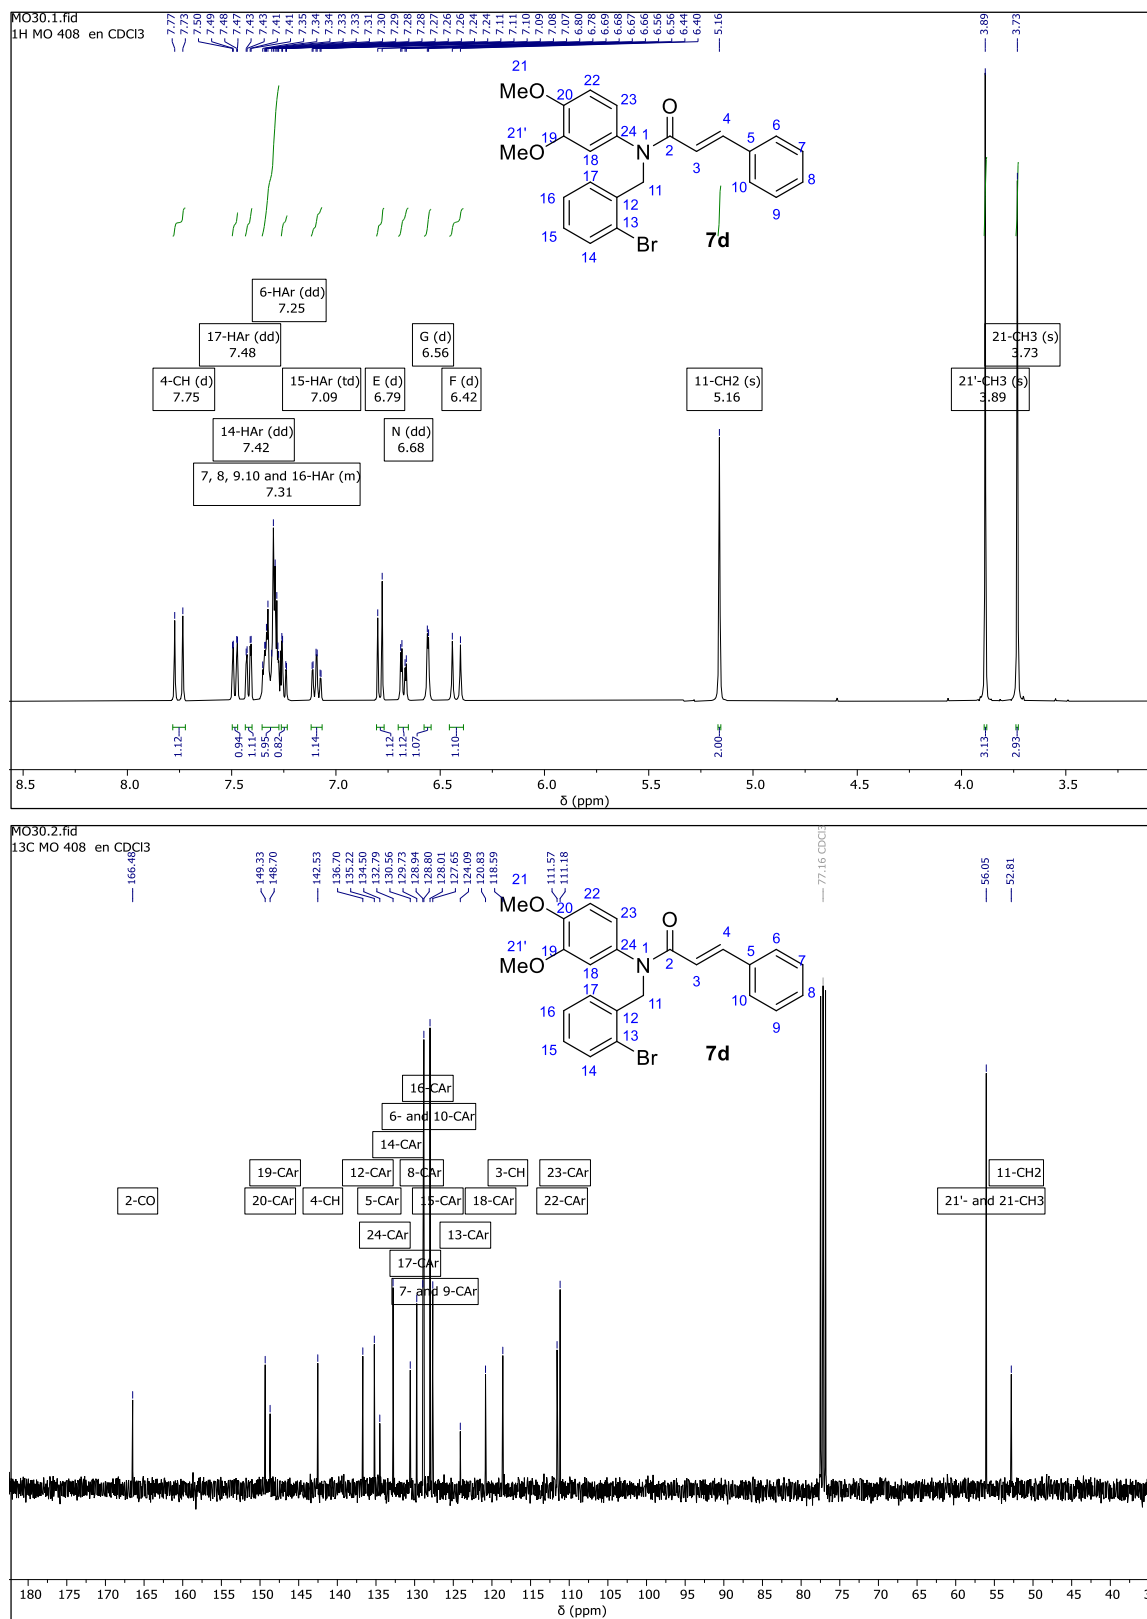

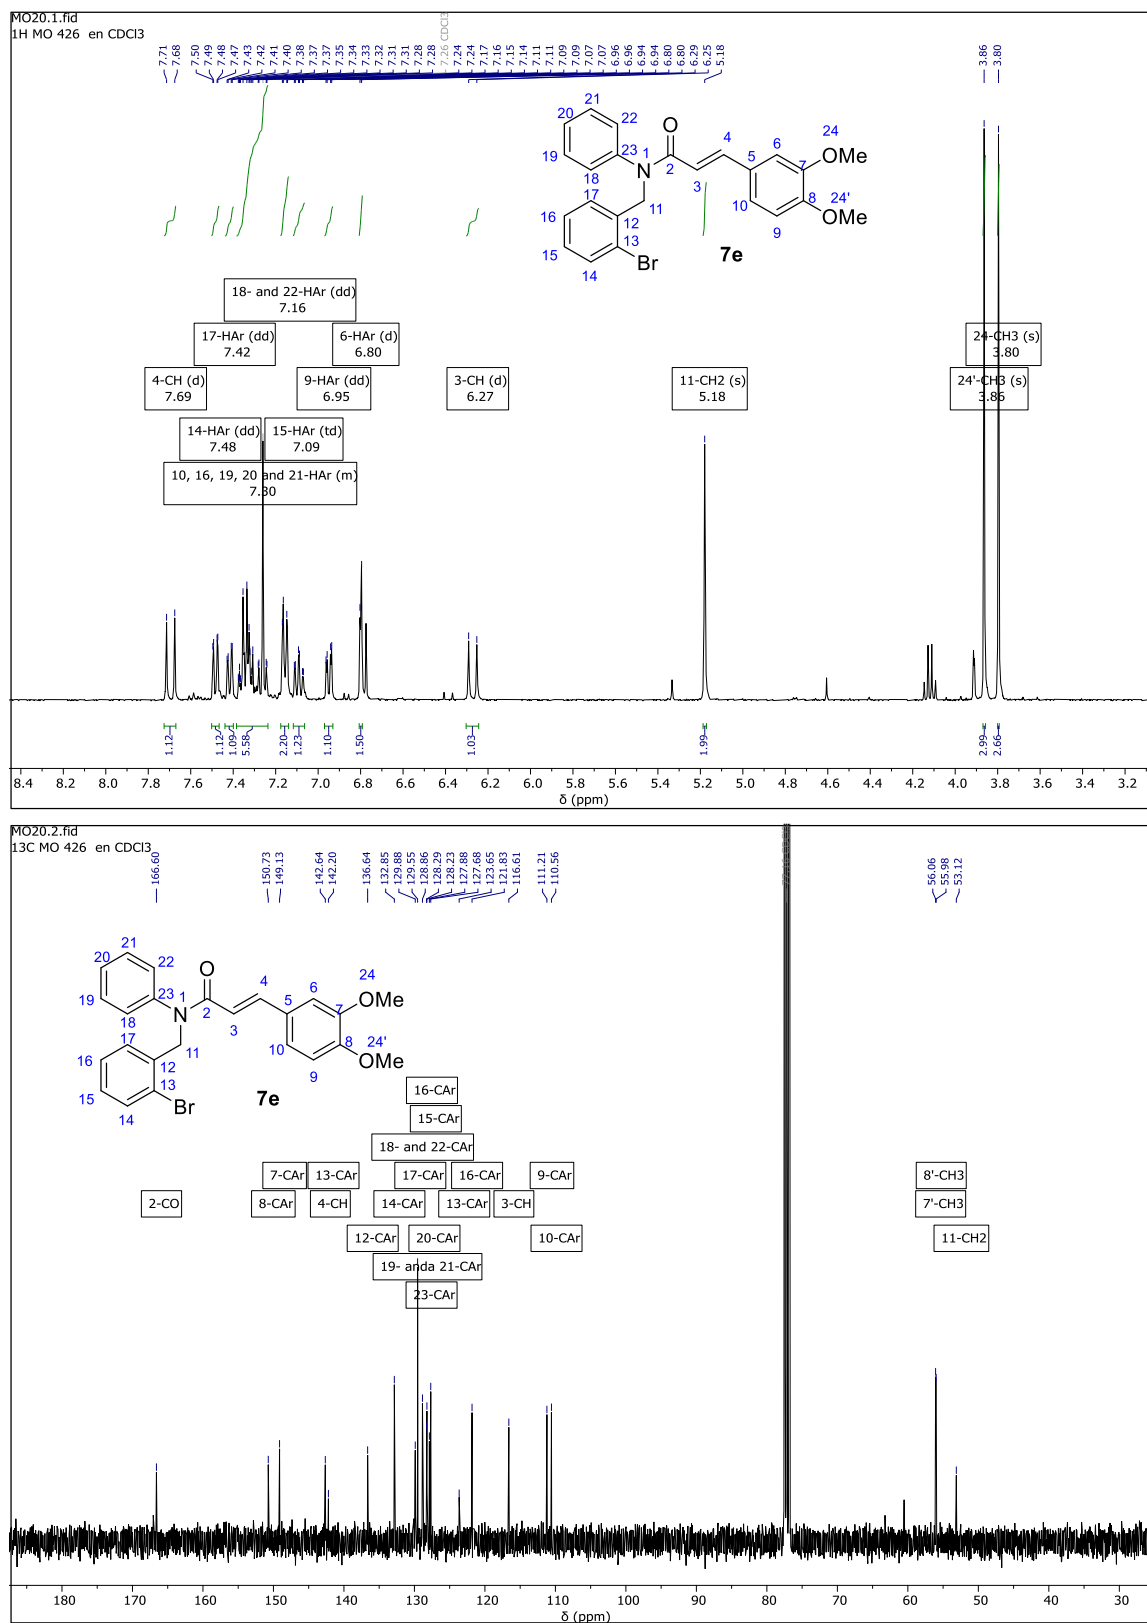

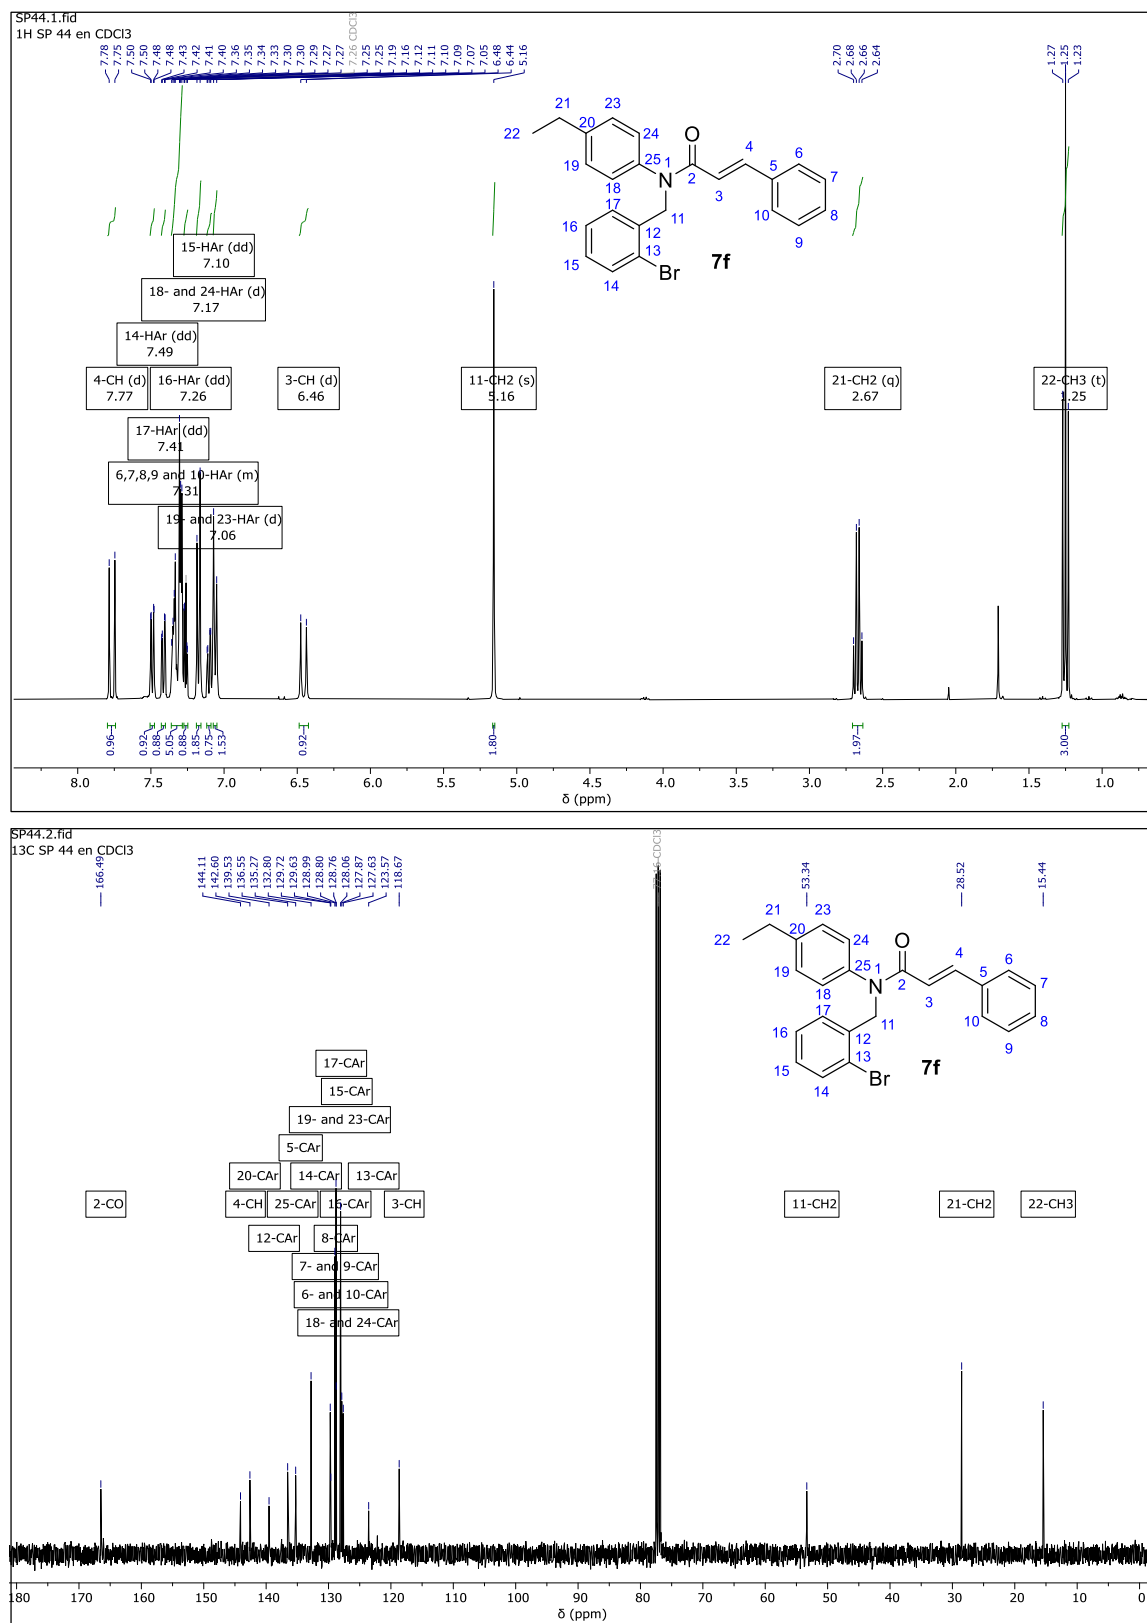

**9. Figures S33-S49 of the respective  $^1\text{H}$  and  $^{13}\text{C}$  NMR spectra of all synthesized *N*-benzyl-4-phenyl-3,4-dihydroquinolin-2(1*H*)-ones 6a-f**

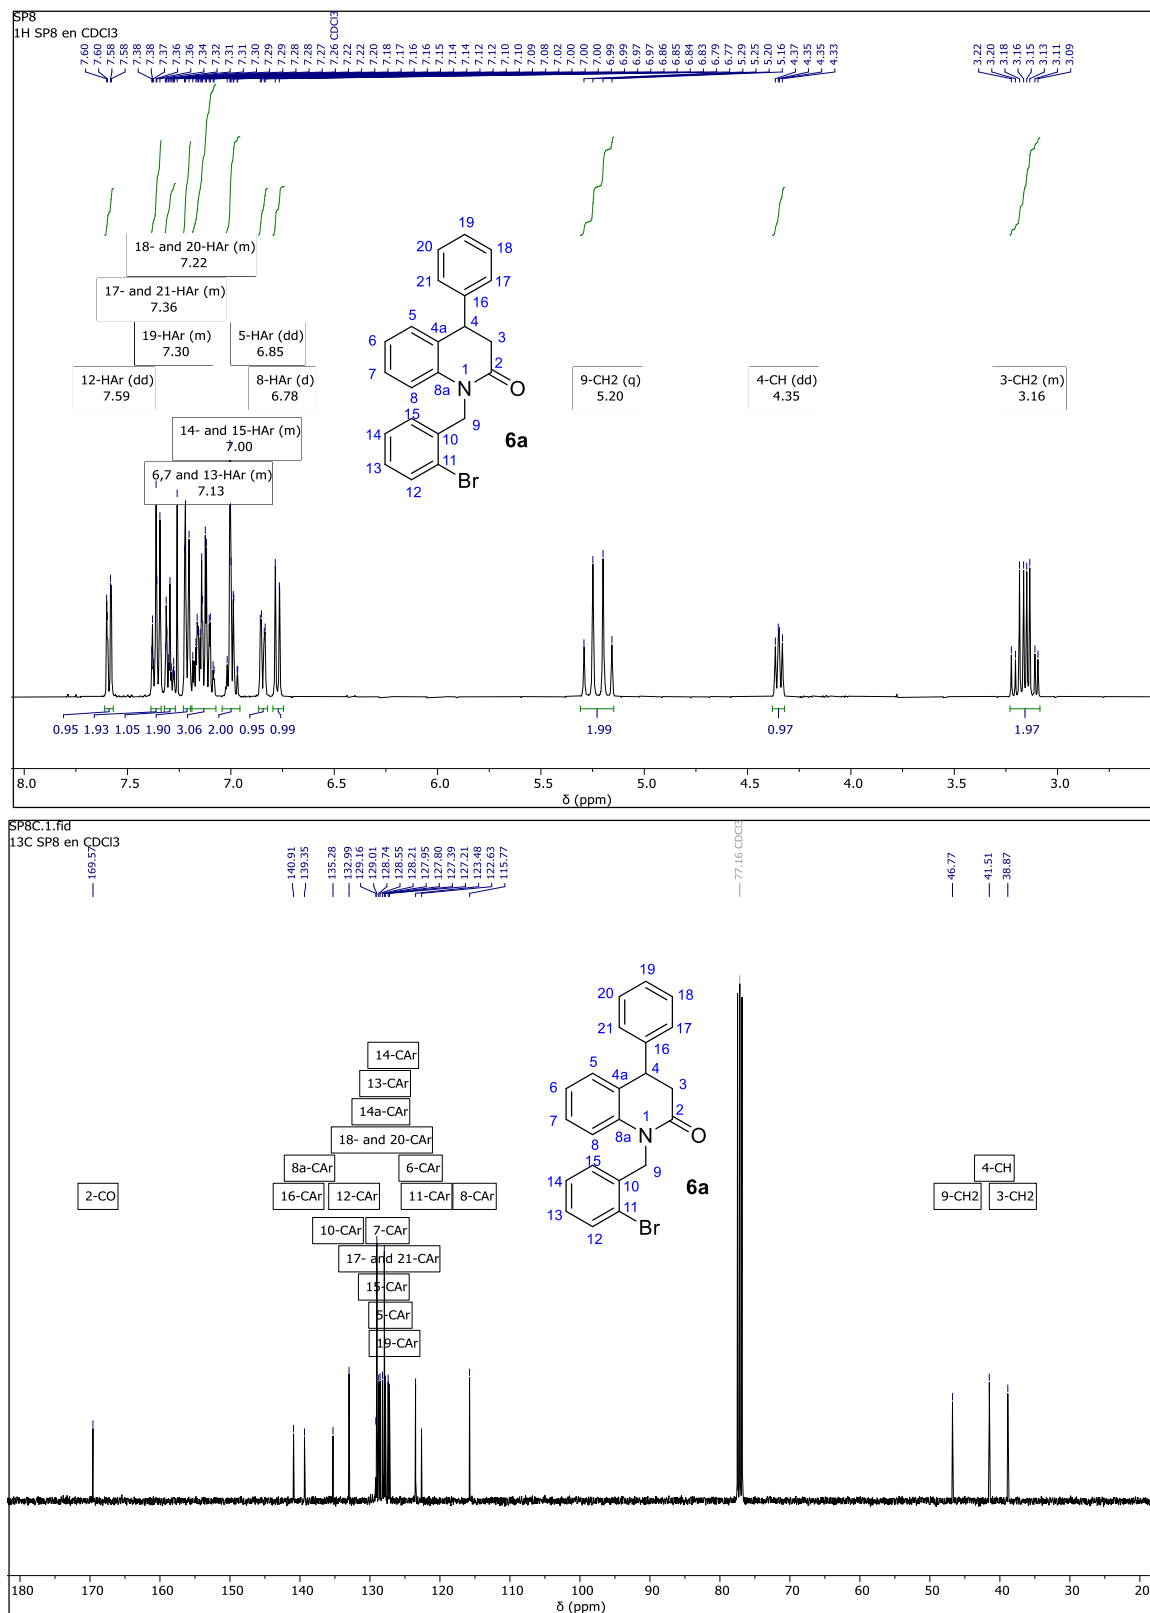



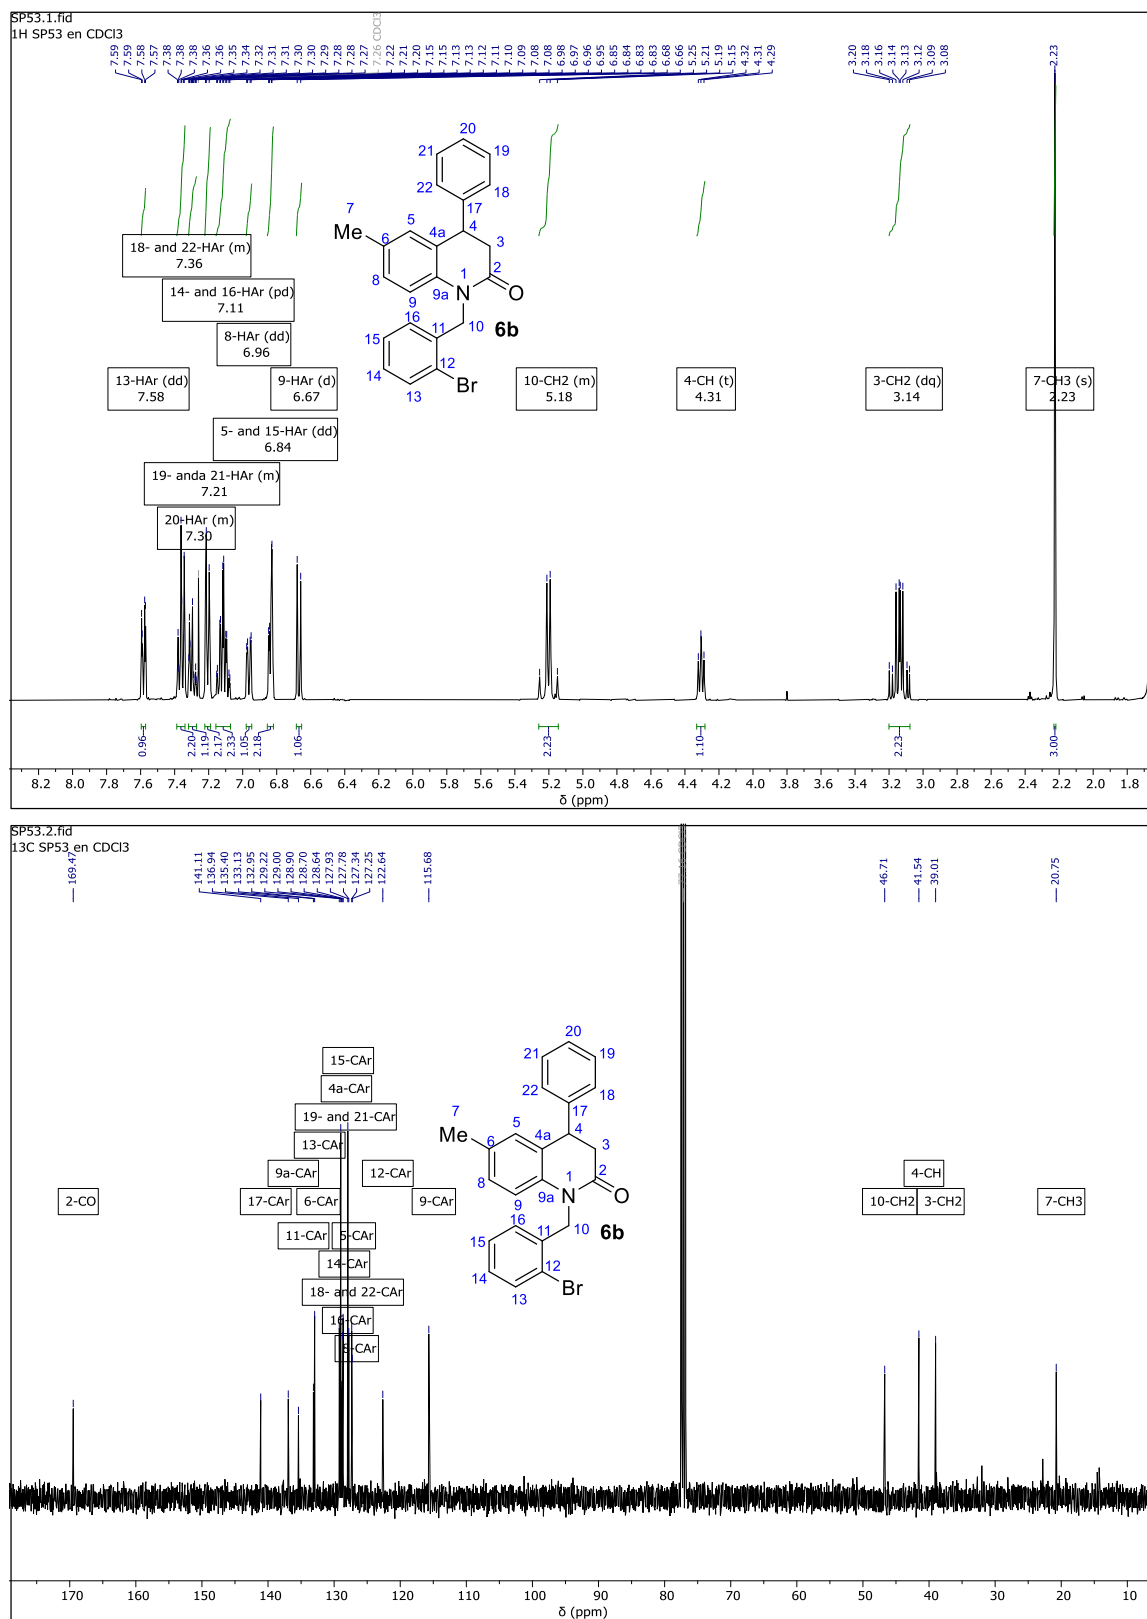

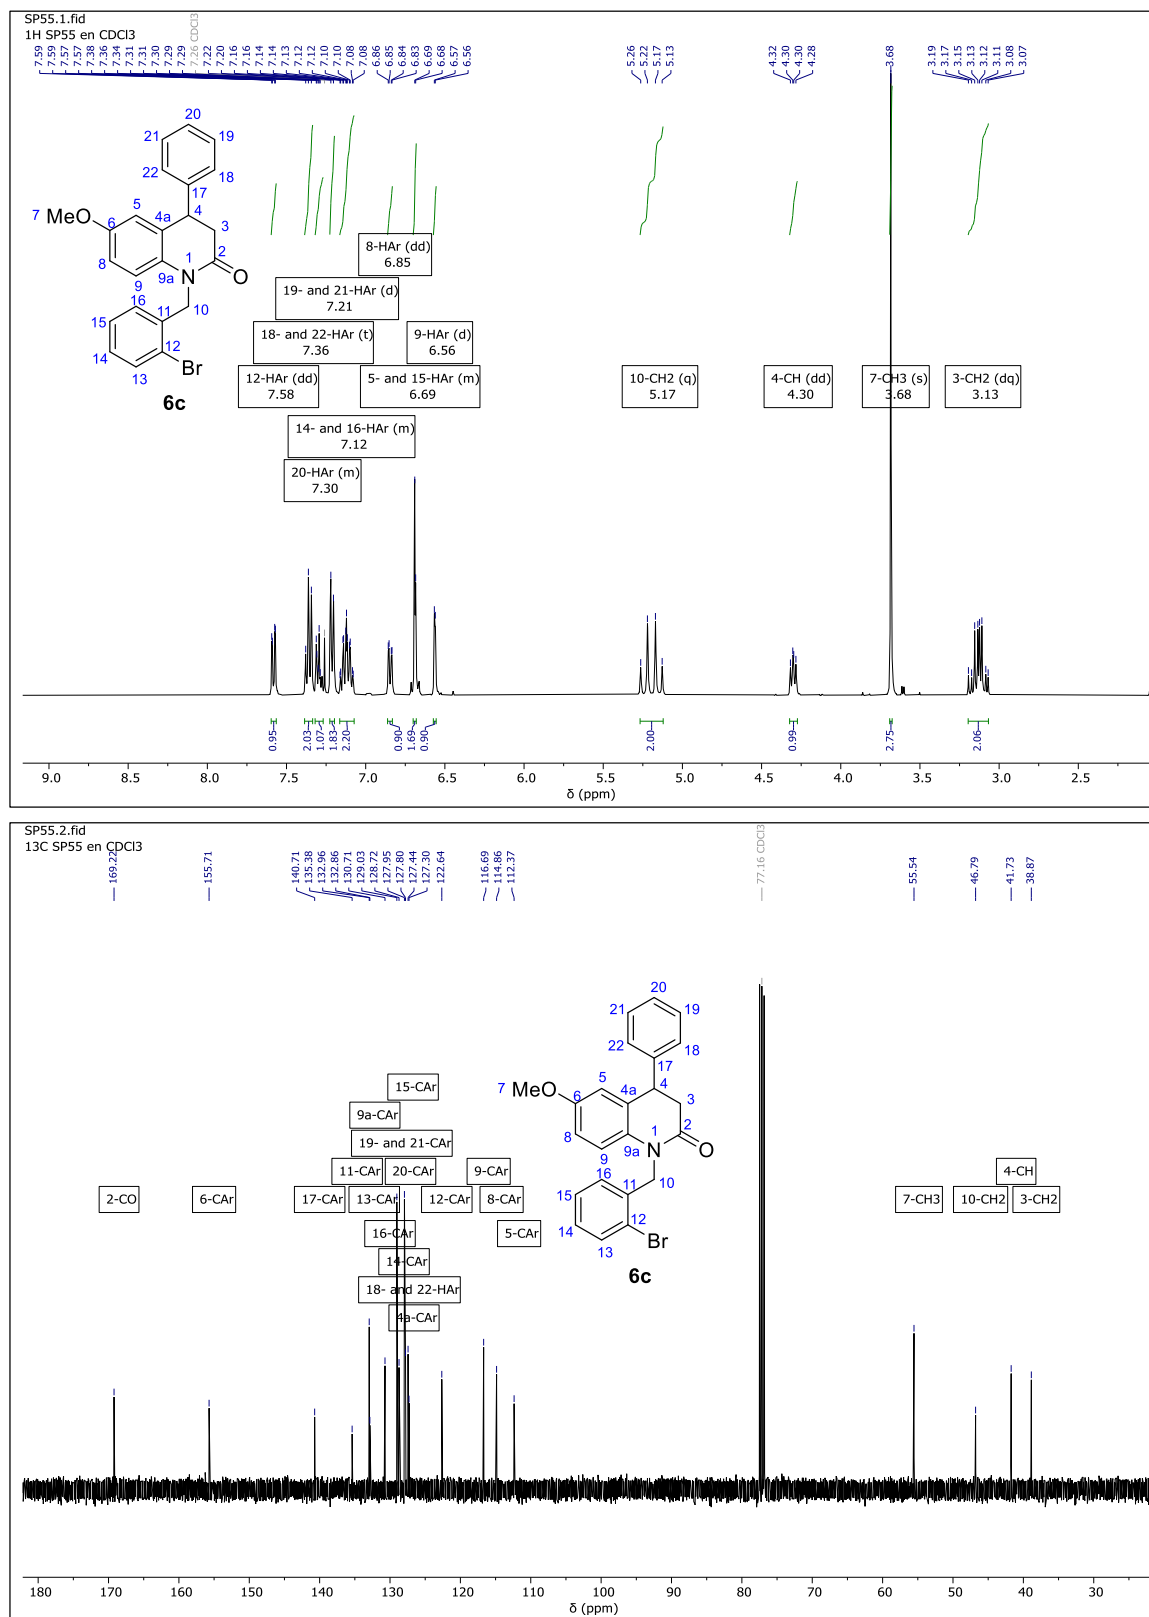

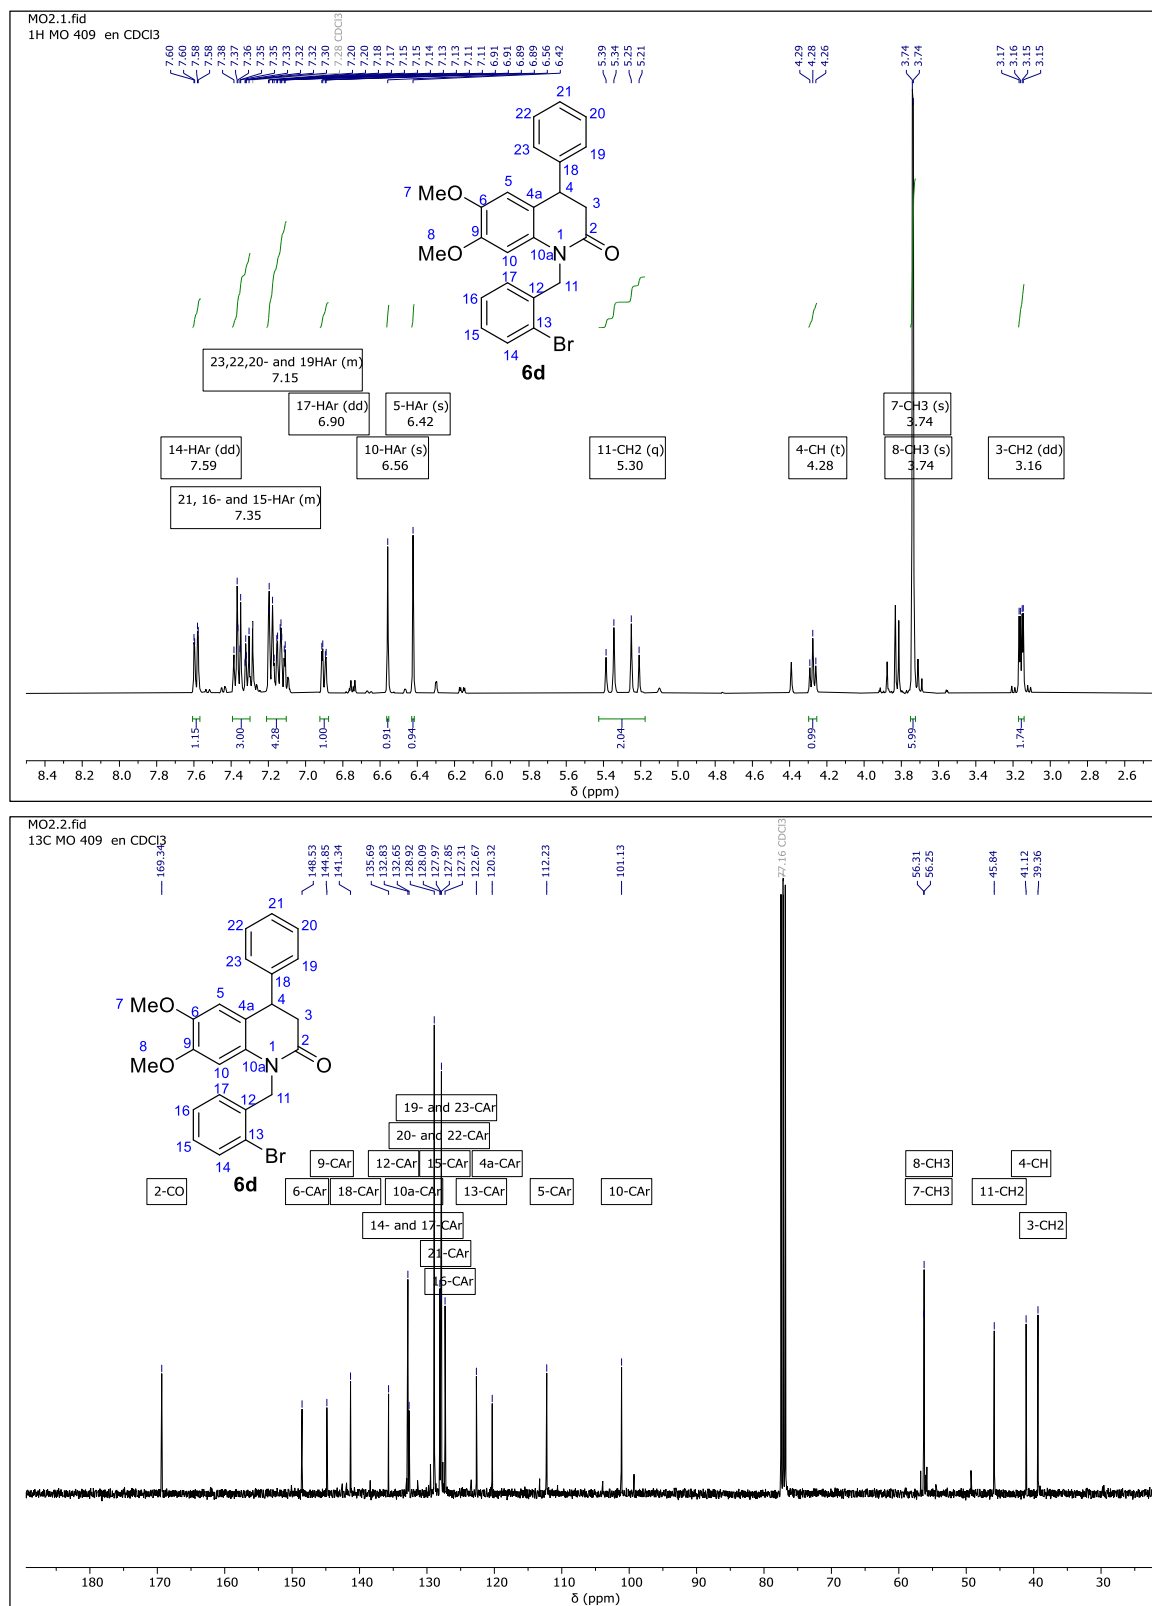

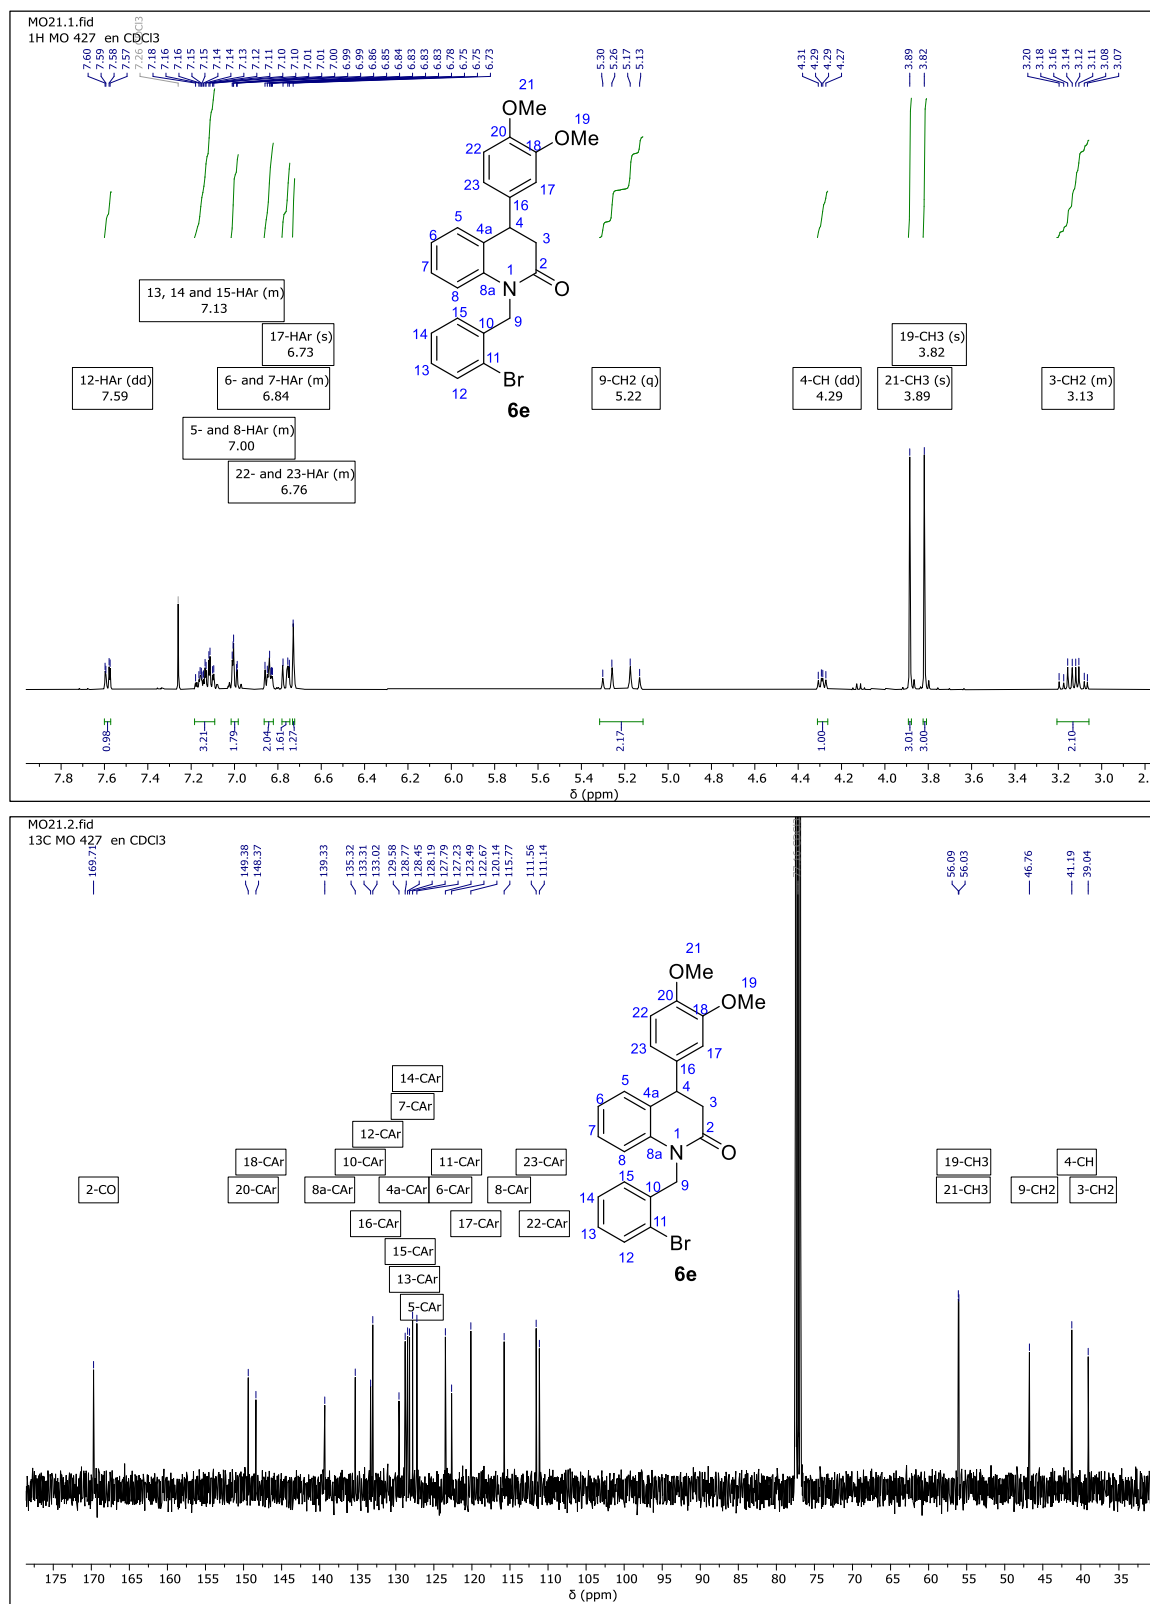

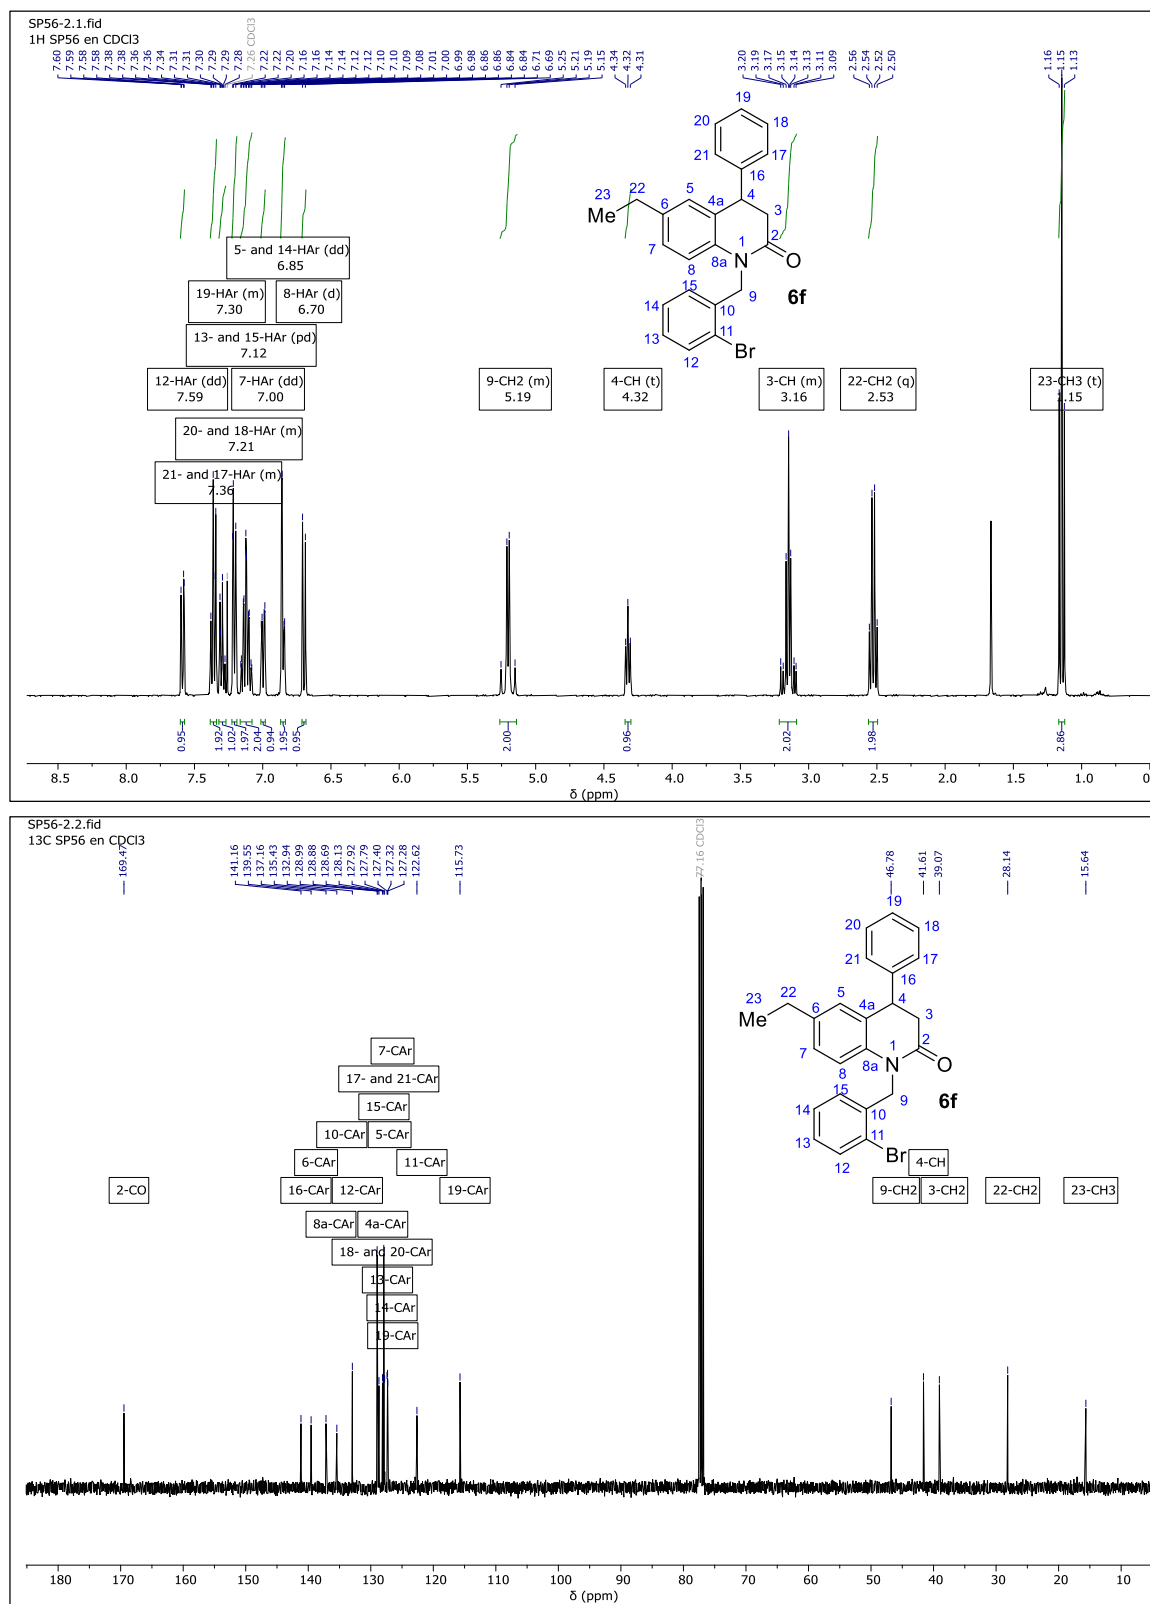

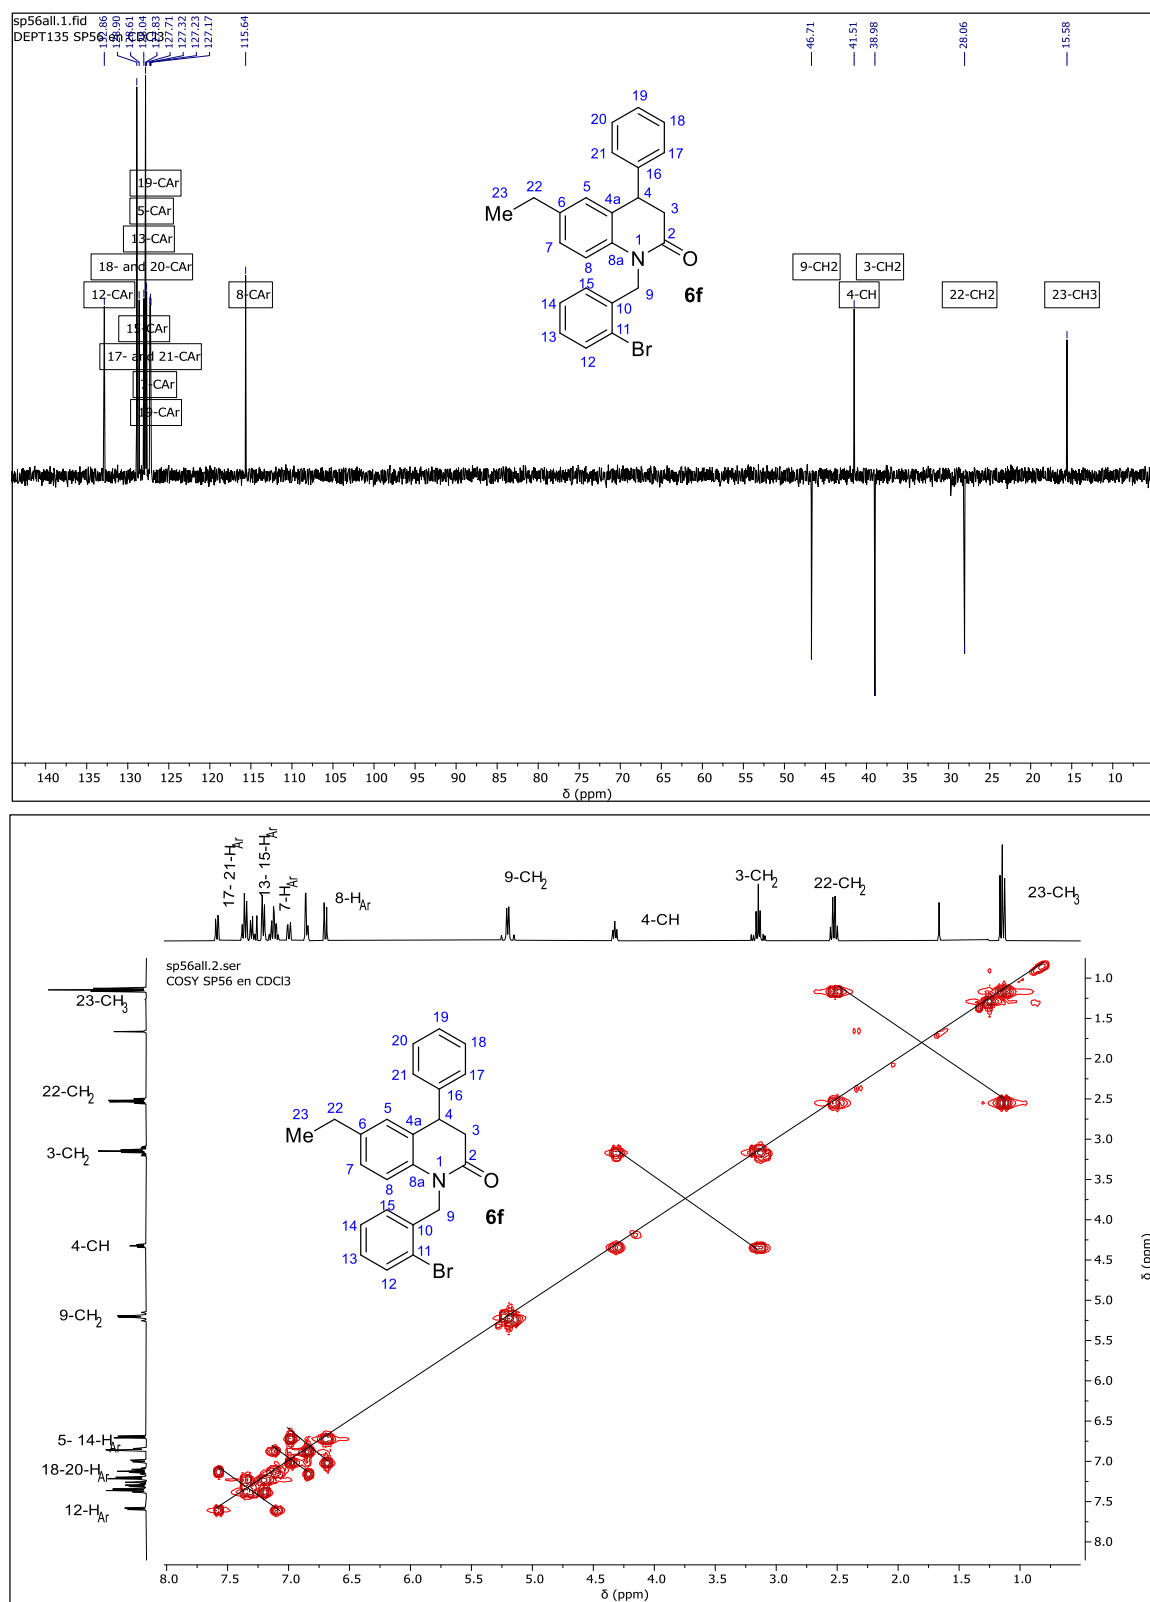

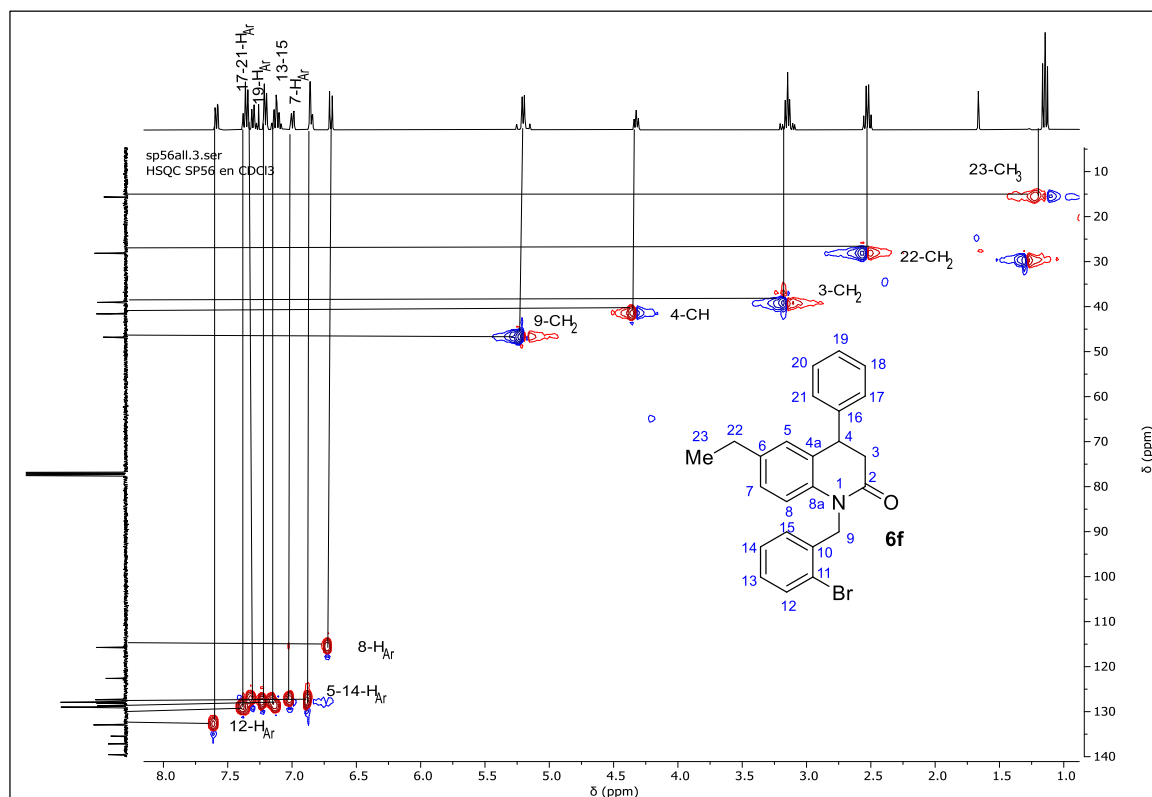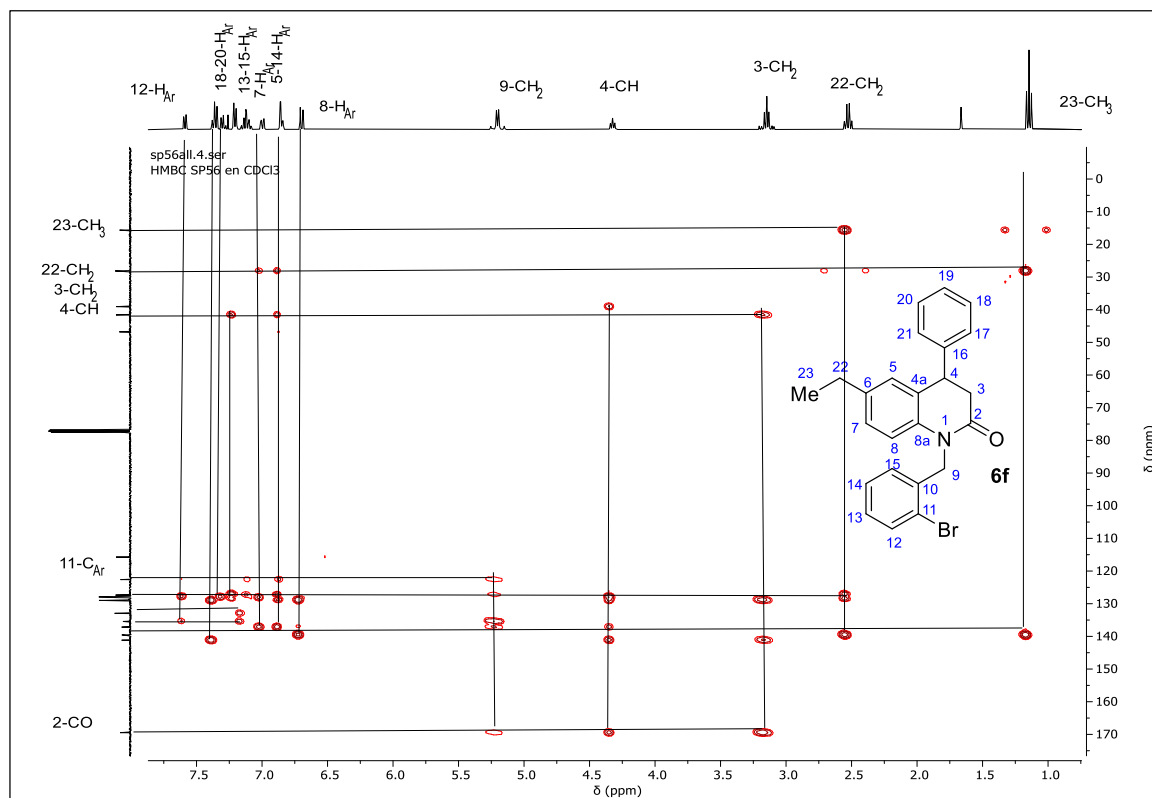

# 10. Figures S50-S66 of the respective $^1\text{H}$ and $^{13}\text{C}$ NMR spectra of all synthesized pyrido[3,2,1-*de*]phenanthridin-6-ones 4a-f

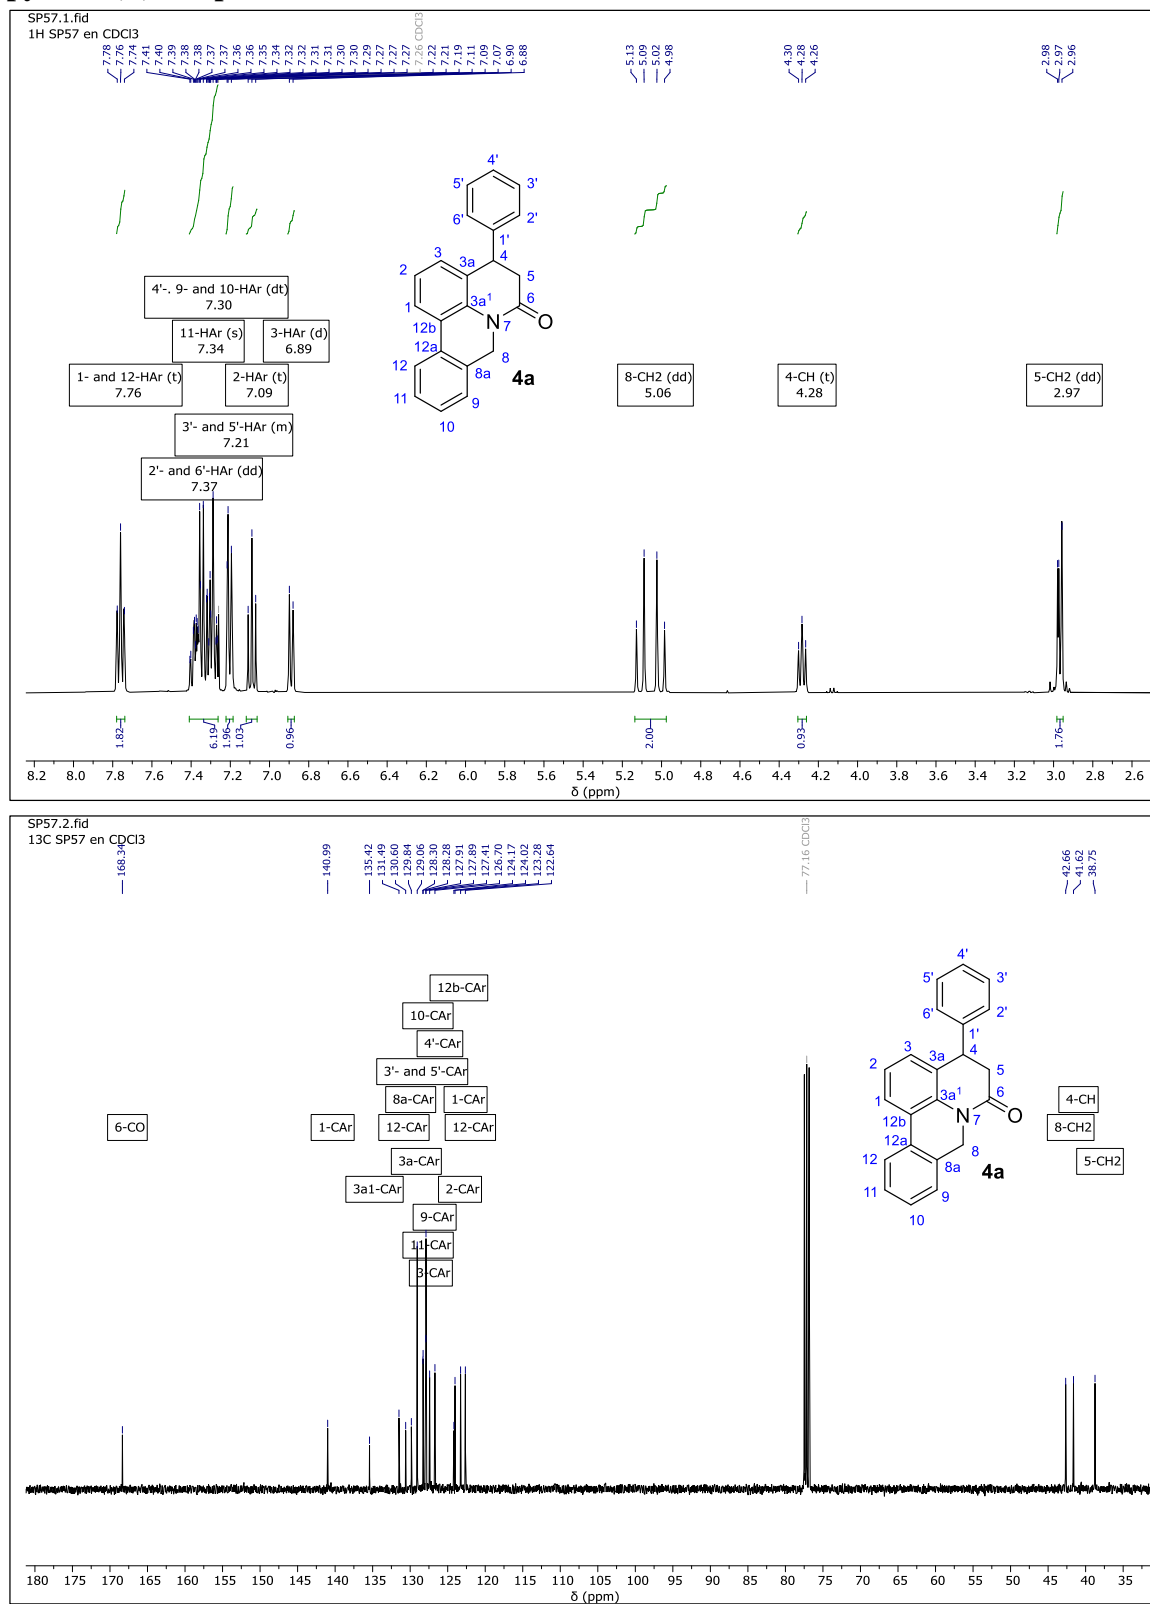



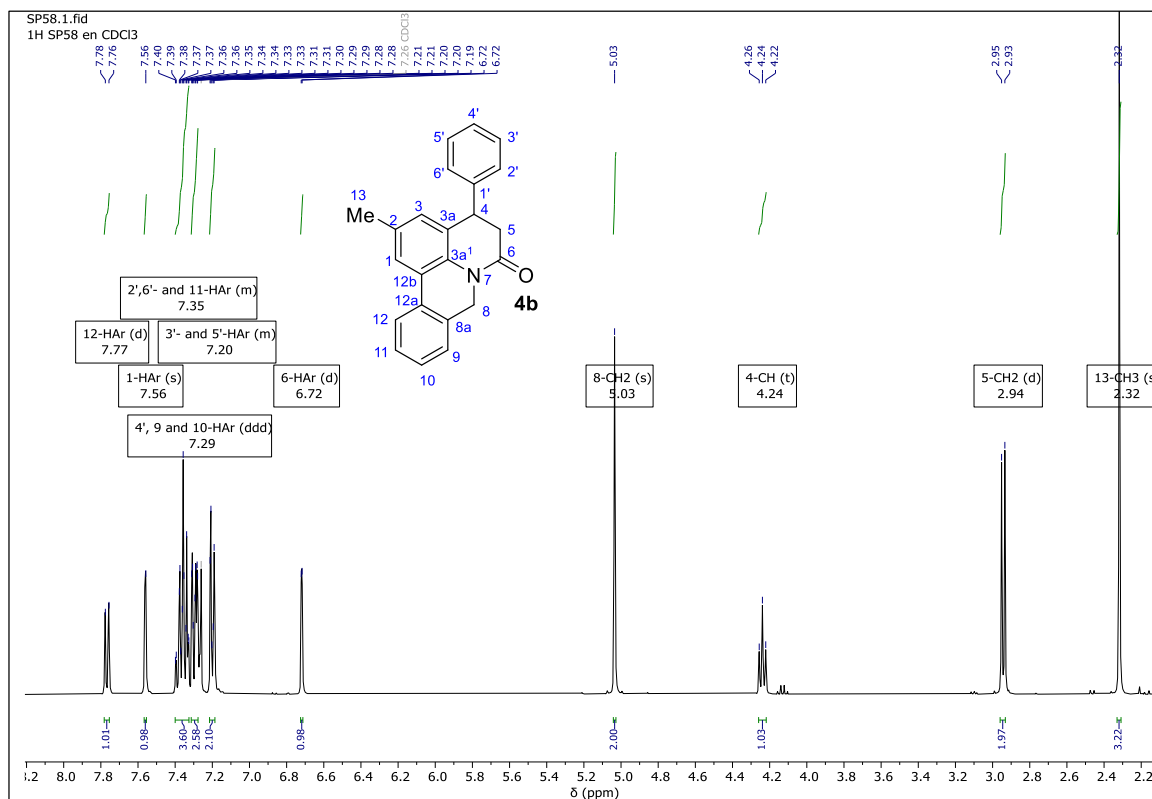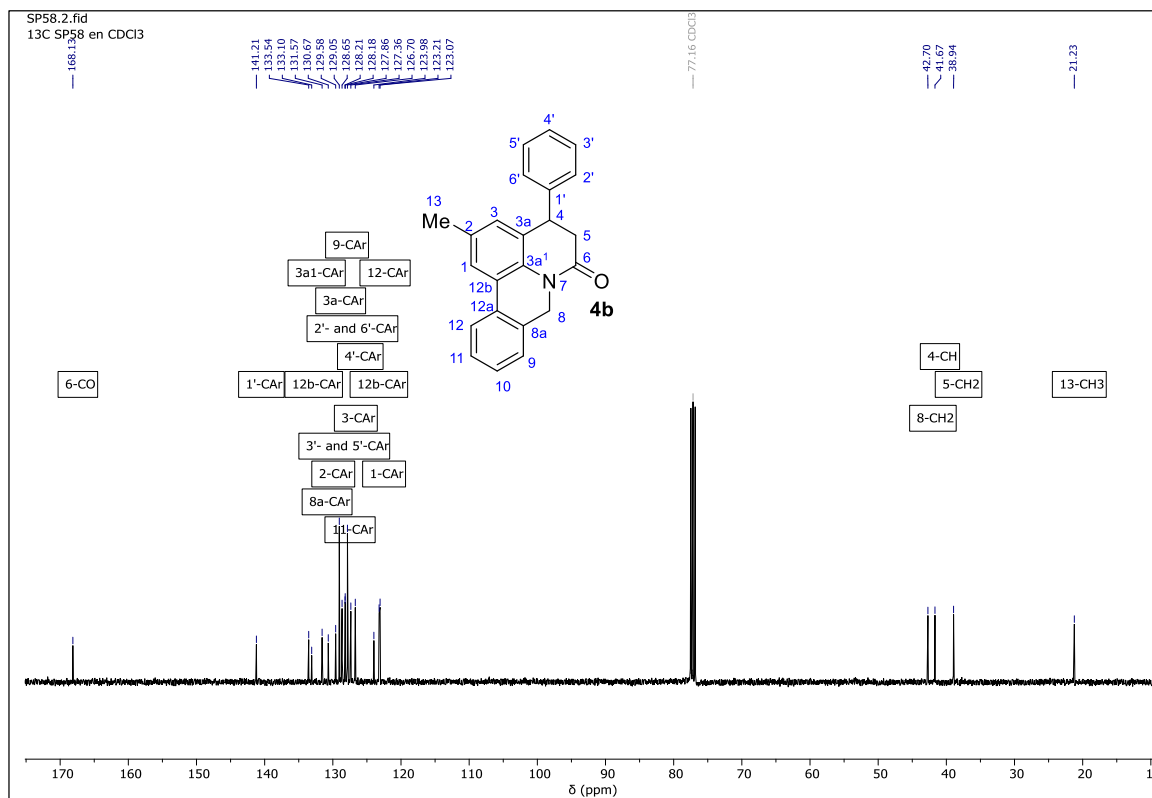

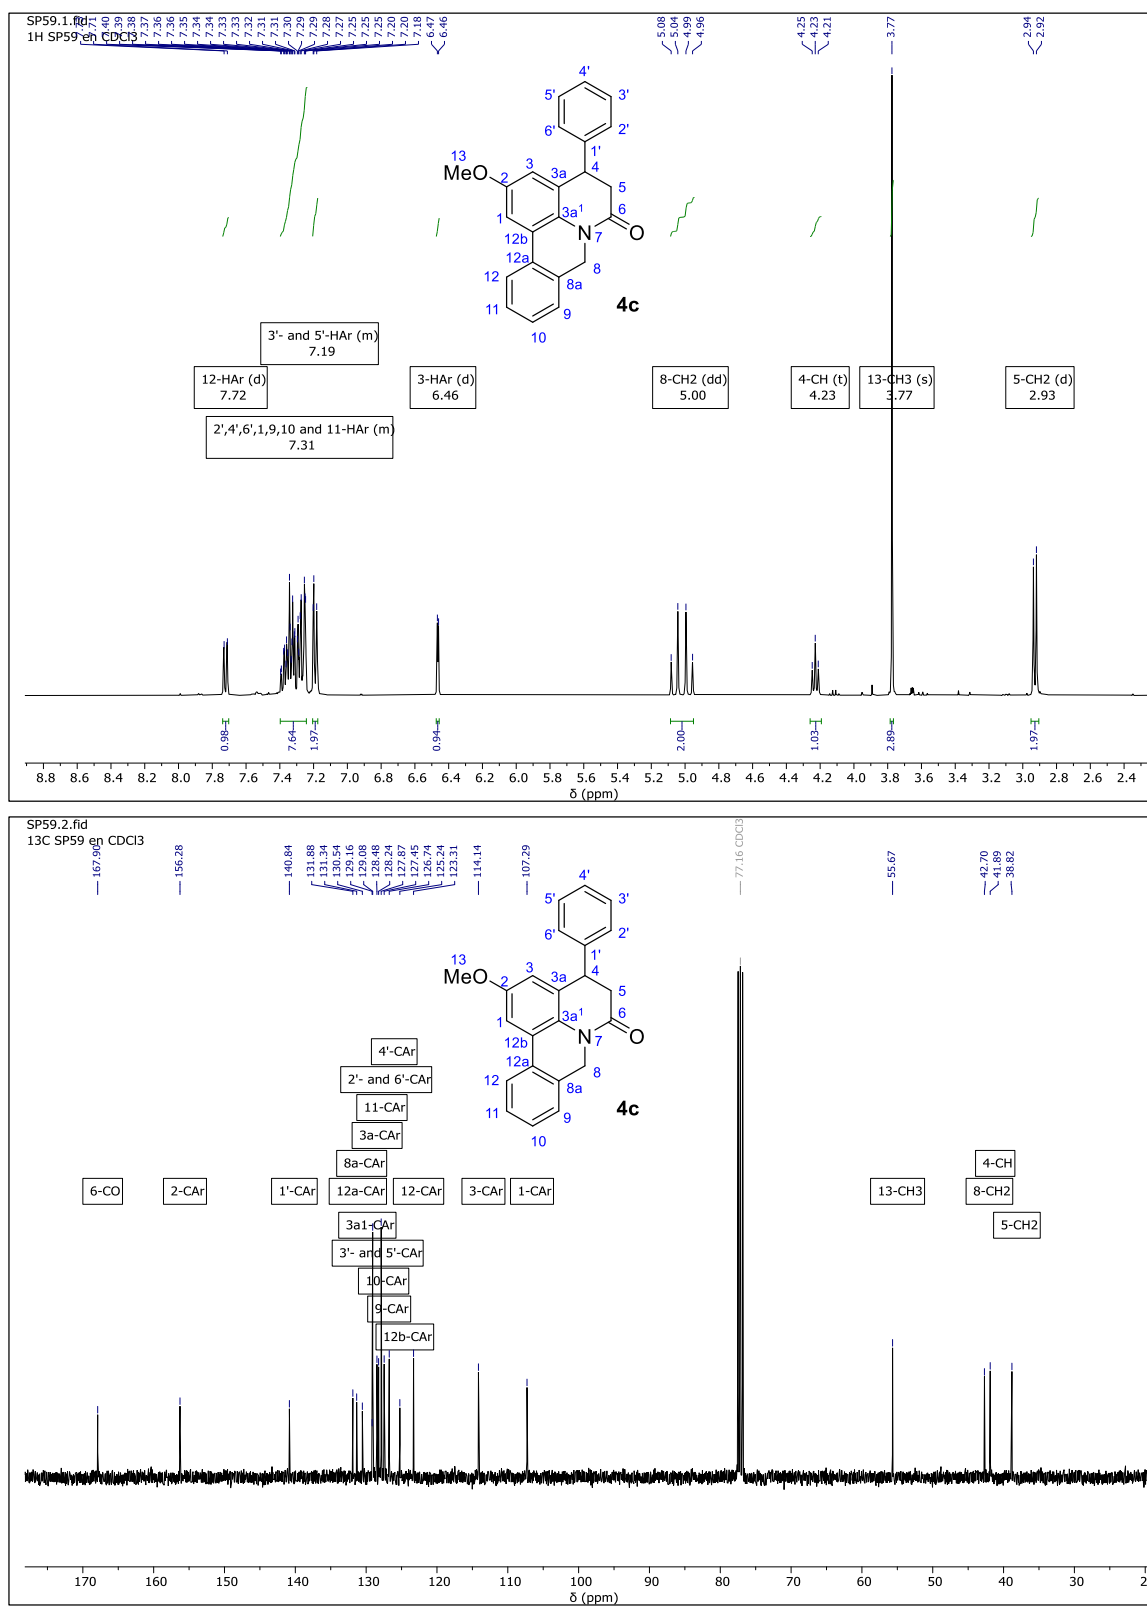

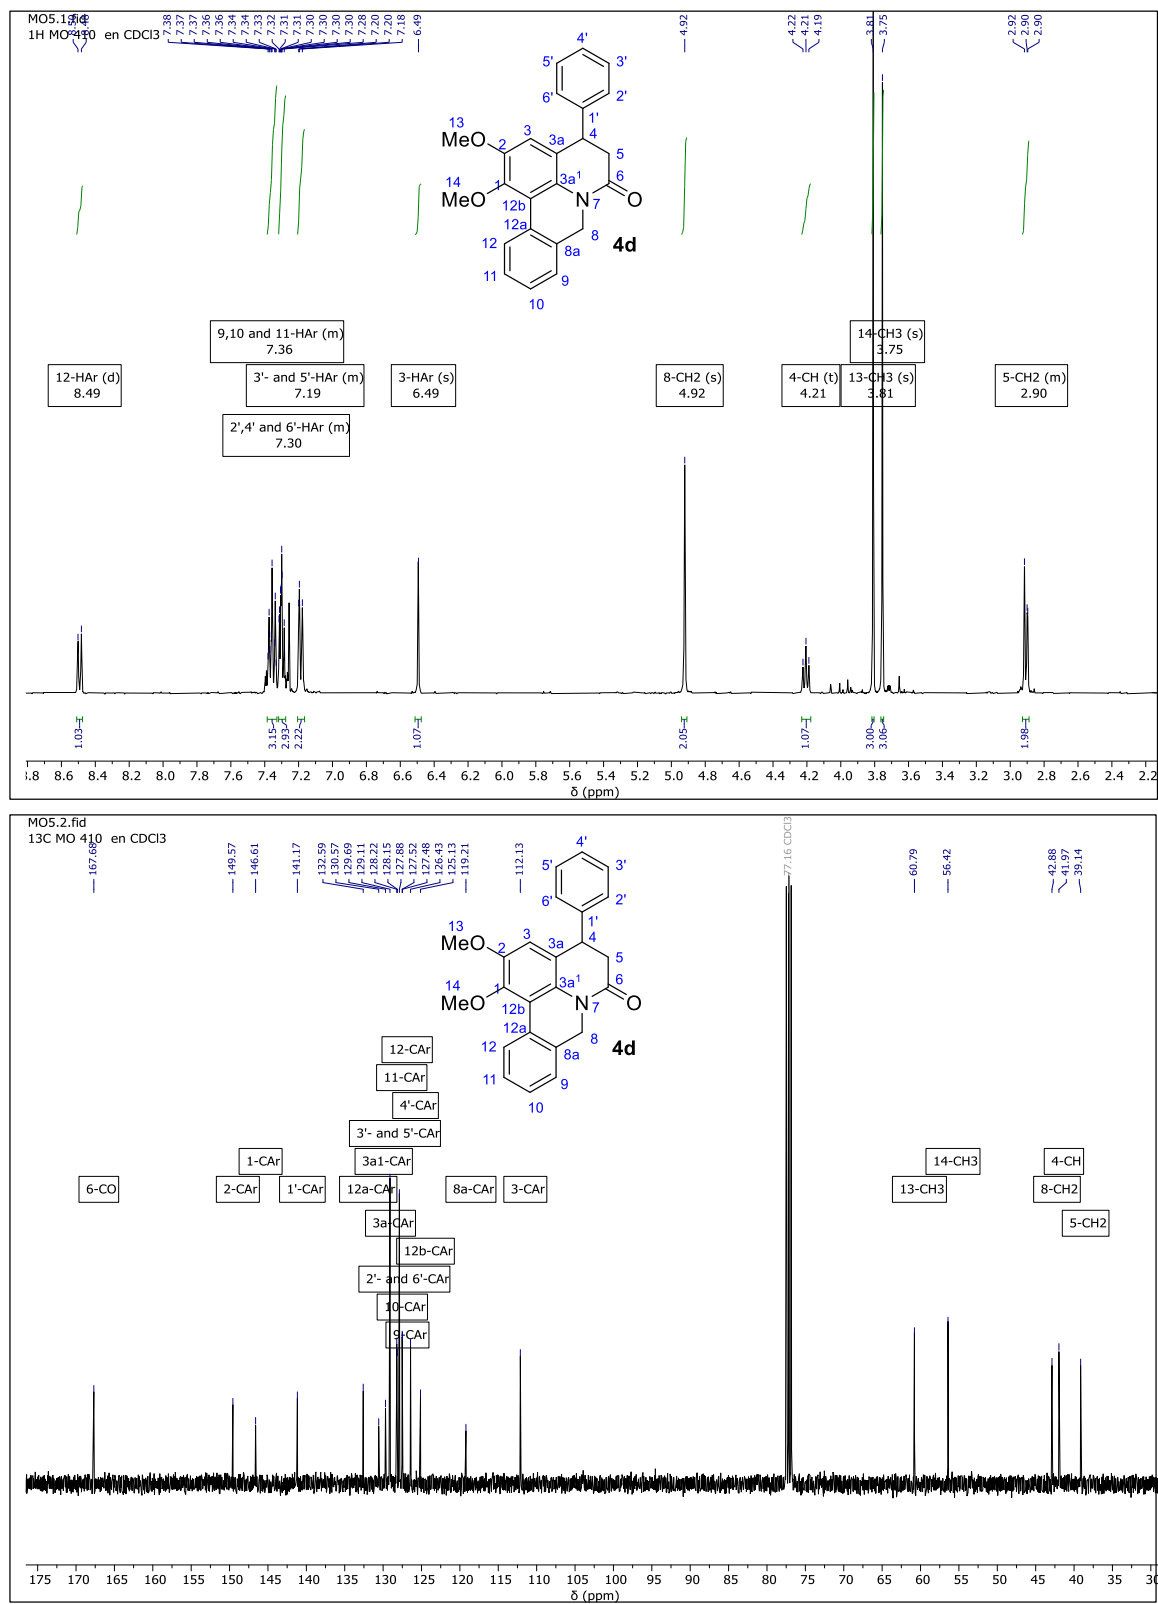

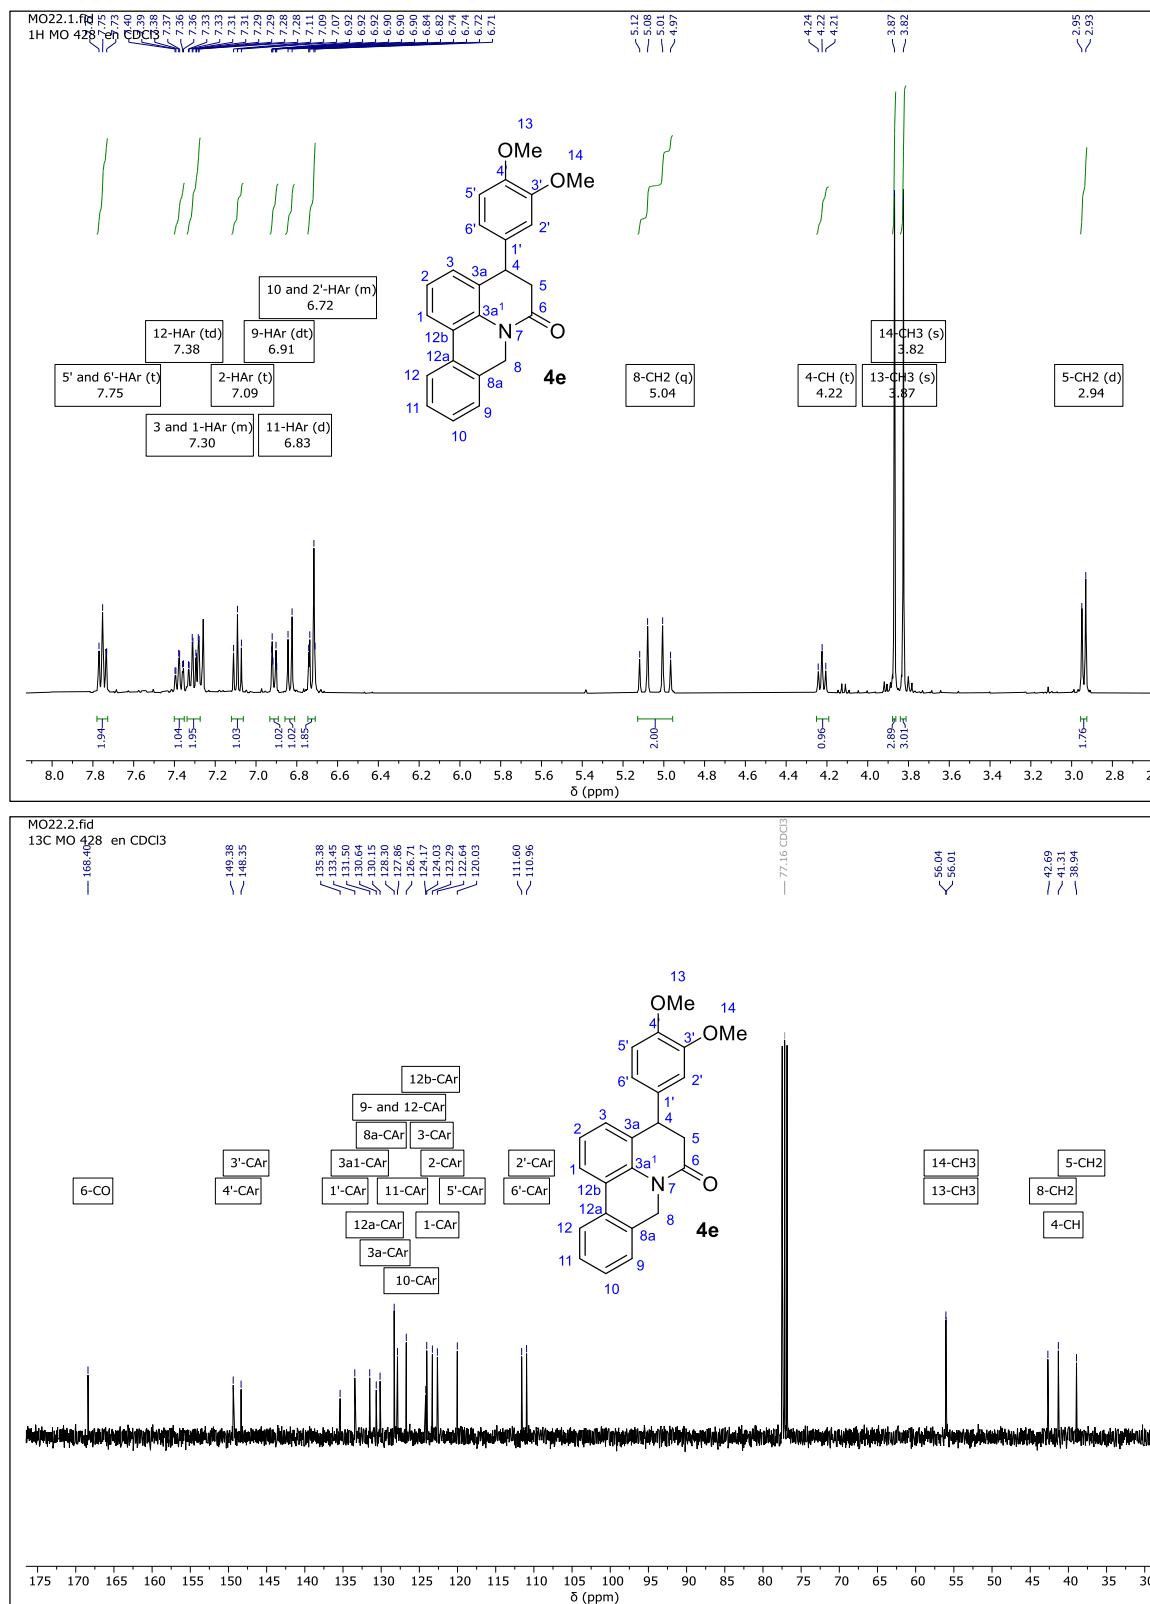

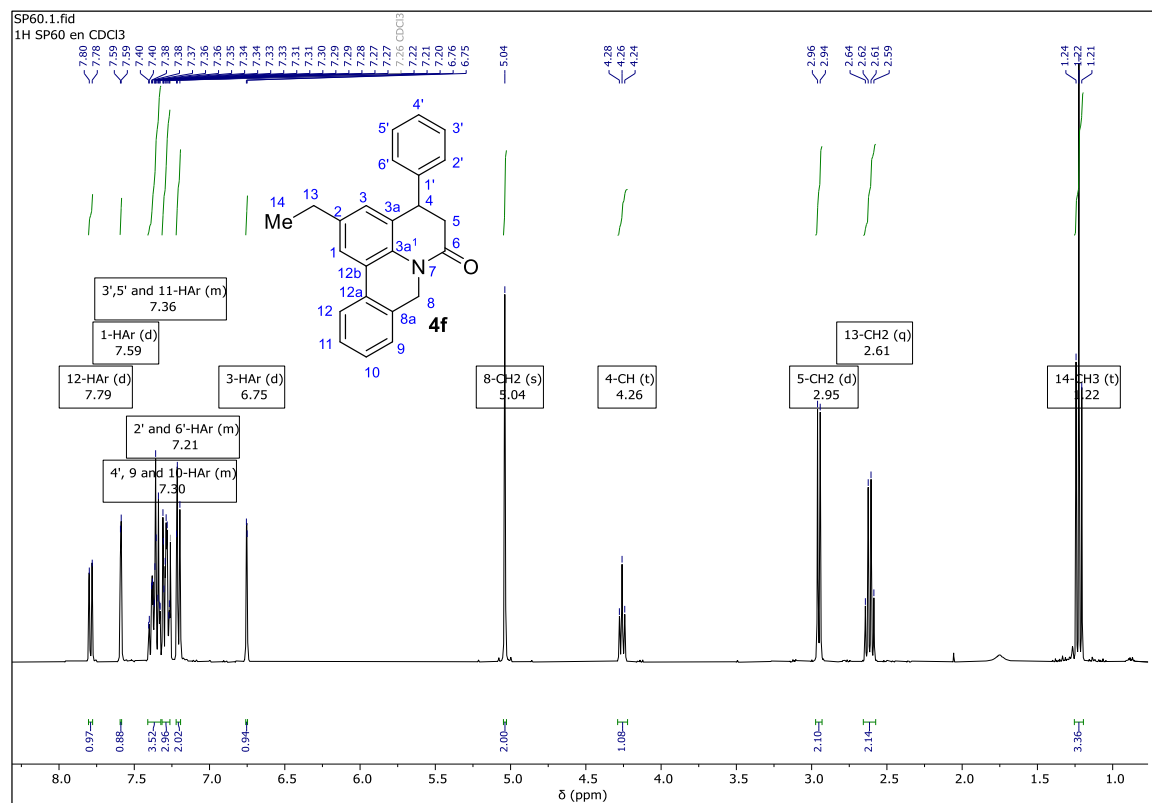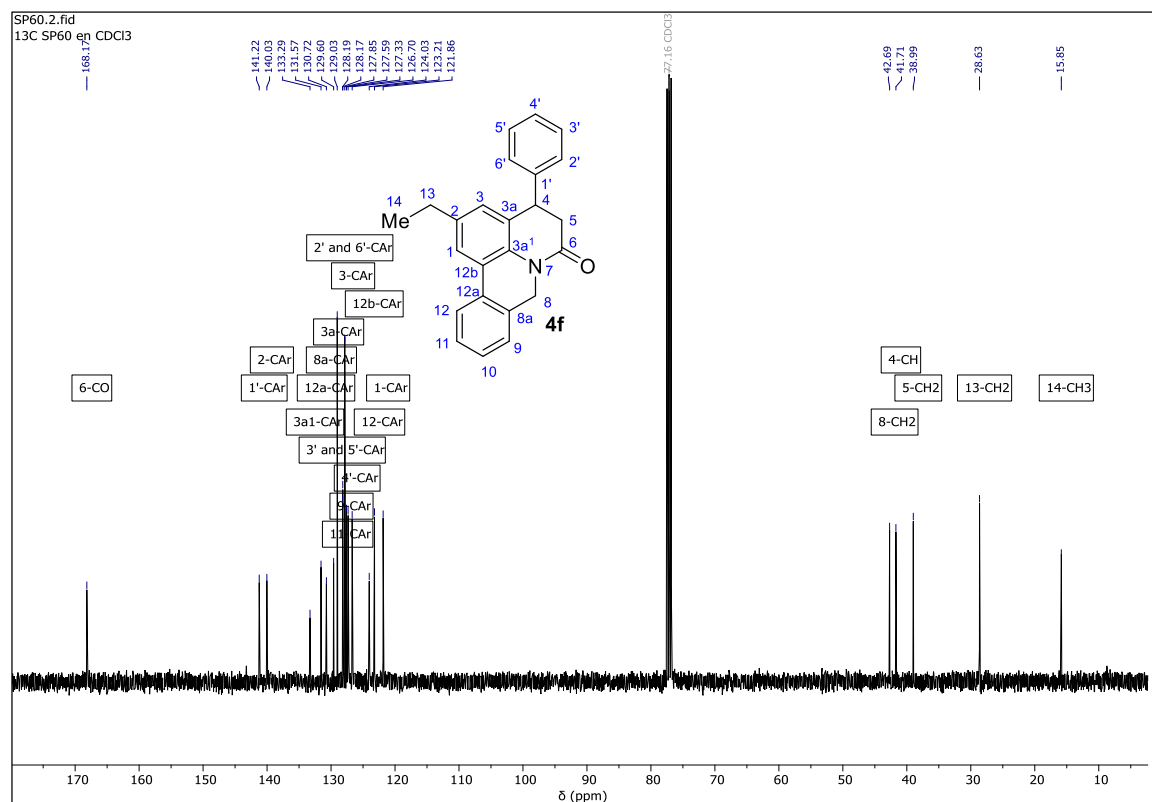

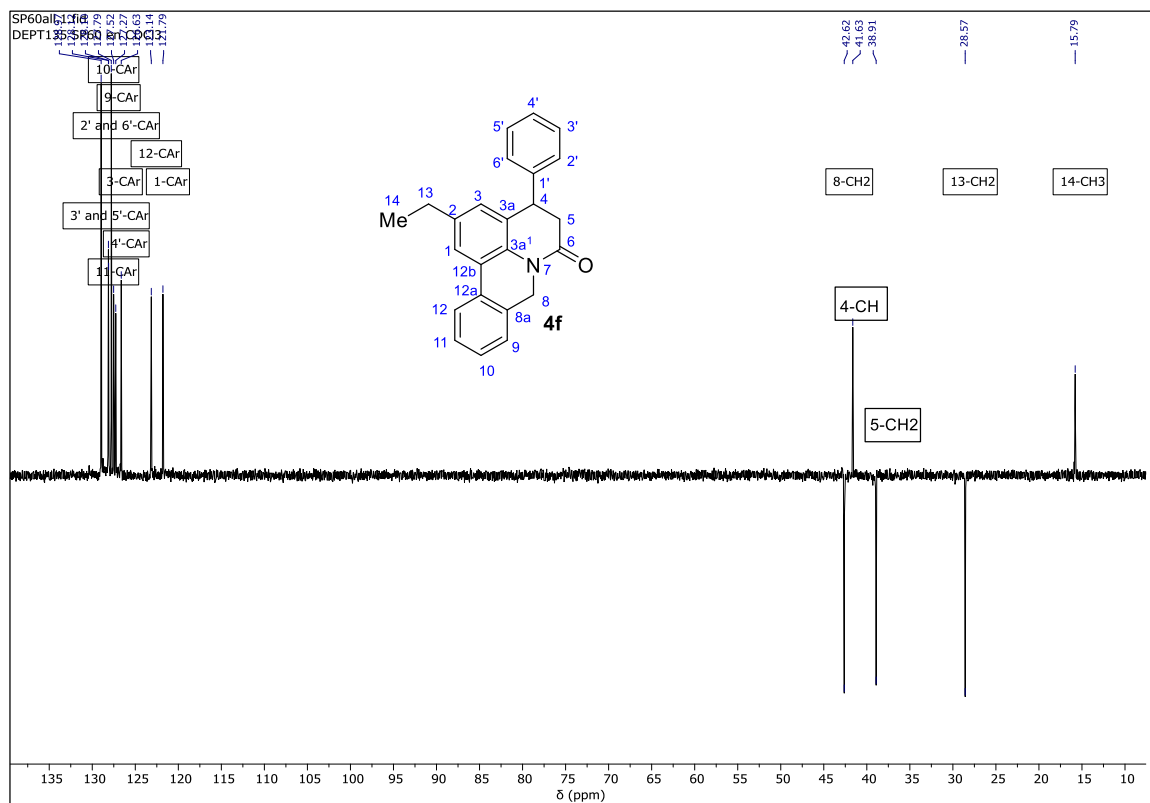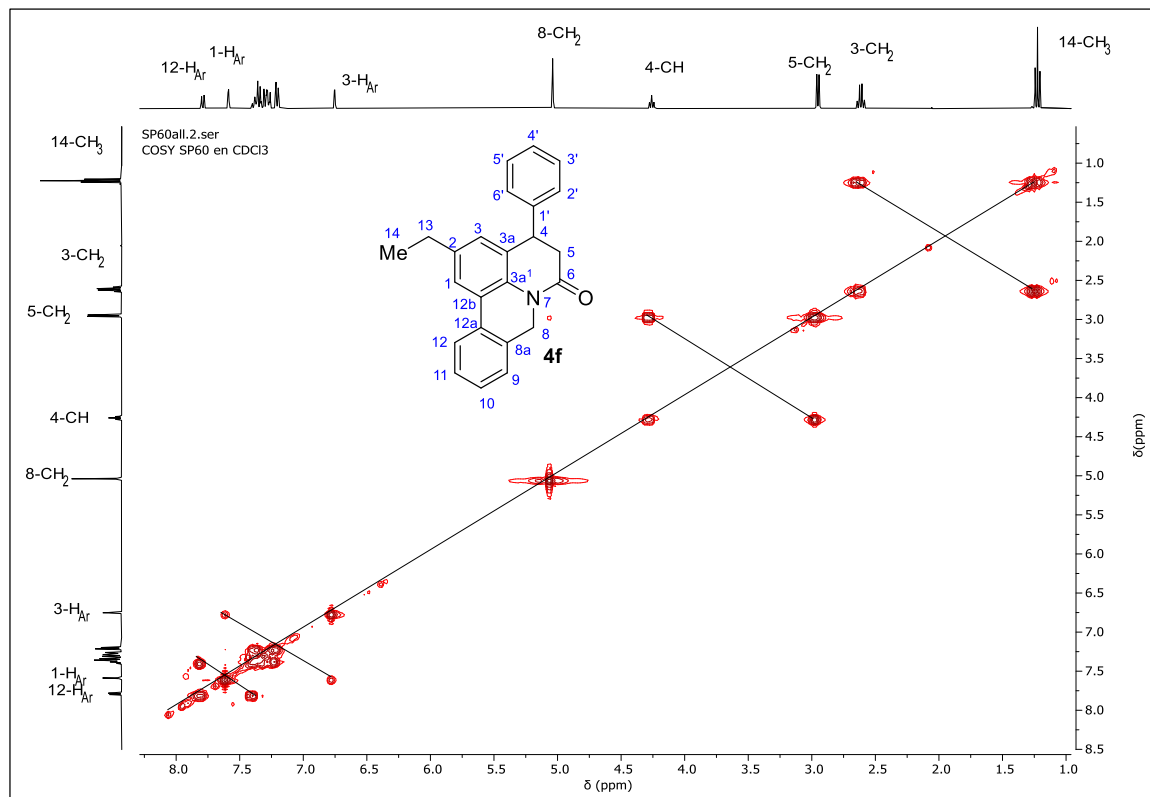

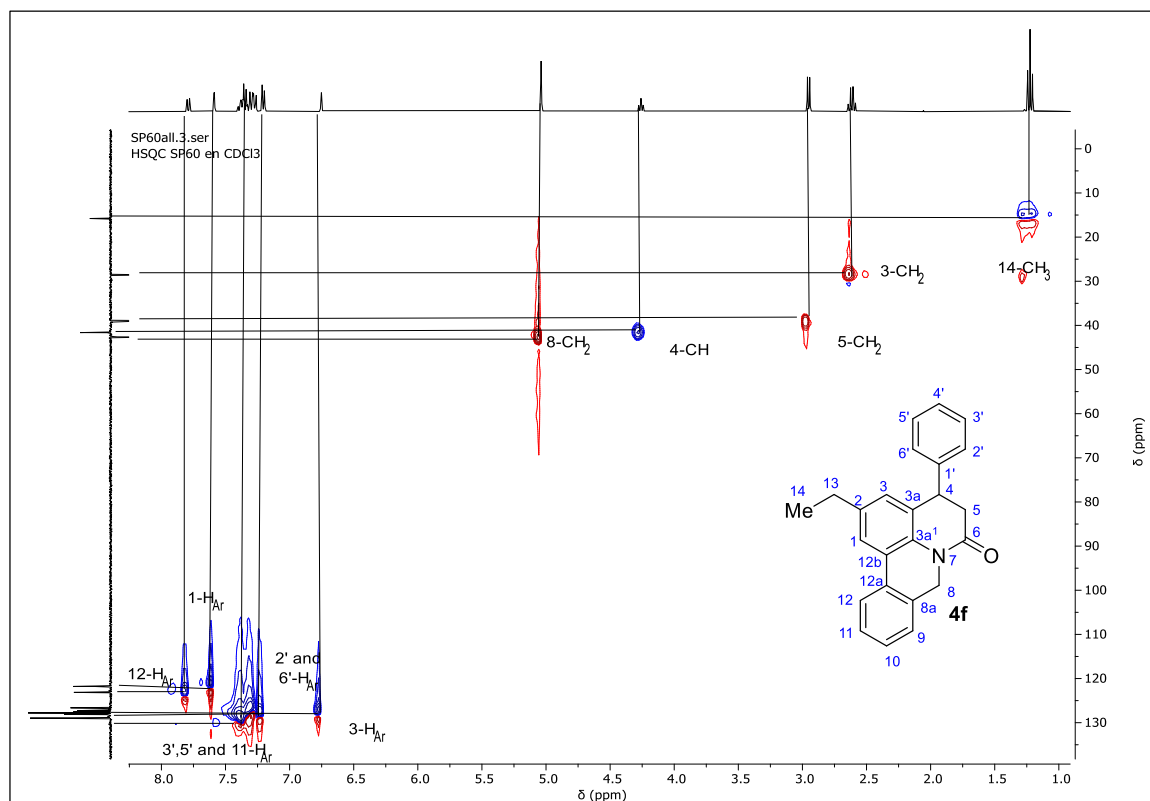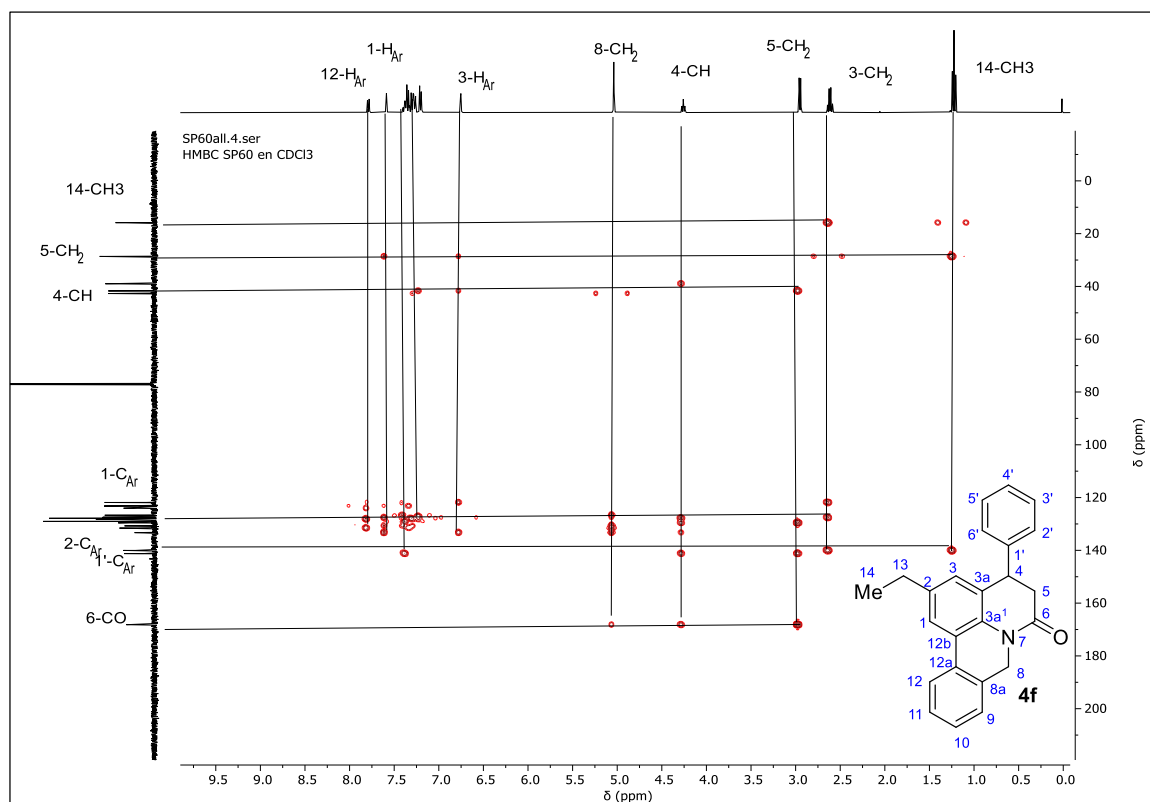

Supplement: s1 [file s1]
